# Supplementary material for: A combination of joint linkage and genome-wide association study reveals putative candidate genes associated with resistance to northern corn leaf blight in tropical maize
Source: Front Plant Sci. 2024 Oct 3;15:1448961. doi: 10.3389/fpls.2024.1448961 (PMC11484028; doi:10.3389/fpls.2024.1448961)
Supplement: Supplementary Table 1 — *, ** significant at P< 0.05 and 0.01, respectively; LSD, least significant difference at 5%, CV, coefficient of variation; KKM, Kakamega; KIT, Kitale. [file Table1.xlsx]

## Sheet: GWAS_BLUPs_392lines
Genotype	BP_TLB1_9	TLB1_9	BLUP_GY	BLUE_GY	BLUP_AD	BLUE_AD	BLUP_ASI	BLUE_ASI	BLUP_PH	BLUE_PH	BLUP_EH	BLUE_EH	BLUP_EPO	BLUE_EPO	BLUP_EPP	BLUE_EPP	BLUP_HC	BLUE_HC	BLUP_ER	BLUE_ER	BLUP_GLS	BLUE_GLS	BLUP_CR	BLUE_CR	BLUP_TLB	BLUE_TLB	BLUP_MOI	BLUE_MOI
IMAS-1:D08WFACXX:1:250018573	3.62	3.53	0.89	0.56	72.99	73.12	4.33	4.77	114.89	112.82	48.86	47.49	0.44	0.43	0.93	0.89	11.88	12.29	10.52	11.31	1.21	1.23	1.51	1.49	2.31	2.27	13.24	12.85
IMAS-10:D08WFACXX:1:250018578	4.5	4.55	1.76	1.79	70.53	70.54	1.71	1.42	114.47	112.65	55.31	55.06	0.48	0.49	0.95	0.95	12.51	13.06	7.79	4.25	1.13	1.1	1.32	1.24	2.75	2.77	13.43	13.28
IMAS-100:D08WFACXX:2:250018738	2.56	2.29	2.09	2.28	75.5	75.78	0.85	0.32	133.03	133.8	56.58	56.48	0.43	0.42	0.99	1.01	3.44	2	13.7	19.31	1.18	1.18	1.61	1.63	1.78	1.65	13.73	13.89
IMAS-101:D08WFACXX:2:250018739	4.32	4.37	1.43	1.34	69.32	69.22	2.19	1.96	141.44	143.89	61.53	62.1	0.43	0.42	0.95	0.93	1.87	-0.4	9.21	7.51	1.18	1.18	1.48	1.46	2.66	2.68	12.97	12.11
IMAS-102:D08WFACXX:2:250018703	4.86	5.12	1.24	0.93	75.7	76.18	1.28	0.55	123.59	122.42	59.13	59.24	0.47	0.48	0.83	0.59	9.58	9.25	10.77	13.27	1.15	1.13	1.52	1.51	2.93	3.06	13.55	13.53
IMAS-103:D08WFACXX:2:250018740	5.51	5.73	1.95	2.07	70.2	70.18	1.42	1.05	130.82	131.2	59.83	60	0.45	0.45	1.02	1.07	3.77	2.42	7.27	2.87	1.2	1.22	1.52	1.5	3.25	3.37	14.18	14.78
IMAS-104:D08WFACXX:2:250018704	3.76	3.68	1.87	1.99	73.32	73.52	1.6	1.15	116.77	115.12	52.84	52.12	0.45	0.45	1.08	1.26	3.63	1.85	9.36	7.79	1.2	1.22	1.43	1.39	2.38	2.34	13.95	14.49
IMAS-105:D08WFACXX:2:250018741	3.75	3.61	1.54	1.47	72.06	72.22	0.92	0.04	124.42	123.62	46.39	44.16	0.38	0.34	0.97	0.97	15.9	18.97	10.32	11.26	1.08	0.96	1.5	1.49	2.37	2.3	13.33	12.92
IMAS-106:D08WFACXX:2:250018705	3.85	3.8	1.38	1.28	76.21	76.56	2.96	2.99	121.63	120.64	53.62	52.85	0.42	0.41	1.08	1.19	5.52	4.54	9.56	8.81	1.18	1.18	1.36	1.29	2.42	2.4	14.29	15
IMAS-107:D08WFACXX:2:250018706	2.98	2.78	2.09	2.27	74.99	75.22	1.33	0.92	144.44	146.74	64.27	64.93	0.43	0.43	1.04	1.12	16.05	17.37	8.22	5.35	1.19	1.2	1.49	1.49	1.99	1.89	13.86	14.11
IMAS-108:D08WFACXX:2:250018707	3.61	3.52	1.2	1.02	76.9	77.23	3.67	3.89	116.58	114.84	58.92	58.93	0.48	0.49	0.78	0.61	1.74	-0.04	10.61	11.42	1.18	1.17	1.42	1.37	2.3	2.26	14.35	15.1
IMAS-109:D08WFACXX:2:250018708	5.75	6.07	1.44	1.35	72.88	73.02	1.1	0.57	149.41	152.37	58.98	59.01	0.4	0.38	1.01	1.07	2.97	1	9.17	7.51	1.14	1.12	1.42	1.39	3.38	3.53	13.34	13.05
IMAS-11:D08WFACXX:1:250018579	4.42	4.46	1.79	1.85	72.82	72.95	2.64	2.6	142.66	144.83	72.39	74.05	0.48	0.49	0.91	0.85	2.2	0.49	8.93	6.96	1.29	1.35	1.83	1.9	2.71	2.73	13.57	13.57
IMAS-110:D08WFACXX:2:250018709	4.03	4	1.57	1.53	73.04	73.18	1.14	0.69	108.31	105.55	51.72	50.95	0.48	0.49	1.04	1.11	18.06	19.83	10.54	11.33	1.19	1.2	1.3	1.22	2.51	2.5	13.41	13.25
IMAS-111:D08WFACXX:2:250018710	5.2	5.37	1.84	1.91	68.61	68.49	1.62	1.33	133.28	133.77	50.41	49.26	0.39	0.38	0.98	1	5.3	4.28	9.75	9.09	1.27	1.33	1.48	1.45	3.1	3.19	13.32	13.05
IMAS-112:D08WFACXX:2:250018711	4.15	4.15	1.34	1.21	75.09	75.35	-0.04	-0.8	131.33	131.77	62.37	62.85	0.47	0.47	1.04	1.1	25.17	28.52	8.71	6.46	1.11	1.07	1.19	1.06	2.58	2.58	14.09	14.59
IMAS-113:D08WFACXX:2:250018742	5.18	5.35	2.03	2.19	72.65	72.75	-0.17	-0.96	150.3	153.35	61.5	61.9	0.42	0.41	0.98	0.99	8.32	7.95	9.11	7.33	1.16	1.15	1.41	1.38	3.09	3.17	13.93	14.29
IMAS-114:D08WFACXX:2:250018743	4.67	4.75	1.19	1.03	76.03	76.33	2.35	2.23	132.11	132.67	68.74	69.88	0.5	0.51	0.94	0.91	15.91	17.21	13.09	17.74	1.17	1.17	1.29	1.23	2.84	2.87	13.51	13.43
IMAS-115:D08WFACXX:2:250018744	3.84	3.79	1.47	1.41	77.7	78.11	2.7	2.65	134.52	135.27	66.59	67.65	0.47	0.48	0.89	0.82	3.53	2.13	9.03	7.22	1.13	1.1	1.38	1.34	2.42	2.39	13.43	13.27
IMAS-116:D08WFACXX:2:250018712	4.45	4.5	1.16	0.96	74.59	74.83	2.76	2.74	135.06	135.93	61.42	61.8	0.45	0.46	0.97	0.98	20.11	22.35	11.1	12.62	1.3	1.38	1.52	1.51	2.72	2.75	14.6	15.61
IMAS-117:D08WFACXX:2:250018713	4.3	4.33	1.68	1.71	76.38	76.94	4.93	5.96	129.08	129.35	58.52	58.48	0.44	0.43	0.9	0.81	17.08	19.64	10.93	12.99	1.13	1.08	NA	NA	2.65	2.67	13.35	12.96
IMAS-118:D08WFACXX:2:250018714	5.2	5.37	1.82	1.91	73.53	73.68	1.39	1.01	135.88	137.1	68.65	70.02	0.49	0.5	1.11	1.24	13.16	13.86	11.35	13.18	1.5	1.69	1.51	1.5	3.1	3.19	13.65	13.73
IMAS-119:D08WFACXX:2:250018715	4.24	4.25	1.58	1.57	73.79	73.96	2.57	2.51	121.6	120.4	56.05	55.66	0.45	0.45	1.02	1.07	3.11	1.6	9.51	8.67	1.24	1.27	1.47	1.43	2.62	2.62	13.33	13.05
IMAS-12:D08WFACXX:1:250018580	3.66	3.59	1.89	1.98	72.48	72.58	2.51	2.43	131.79	132.17	61.23	61.5	0.46	0.46	0.97	0.98	2.73	1.13	8.86	6.77	1.12	1.1	1.35	1.28	2.33	2.29	14.16	14.75
IMAS-121:D08WFACXX:2:250018745	4.5	4.55	1.87	1.99	68.93	68.85	2.04	1.85	129.53	129.9	59.13	59.35	0.45	0.44	0.98	0.99	8.86	8.62	8.29	5.45	1.1	1.05	1.37	1.3	2.75	2.77	13.54	13.5
IMAS-122:D08WFACXX:2:250018717	4.44	4.51	1.7	1.76	70.63	70.65	2.75	2.72	110.69	107.94	52.99	52.36	0.48	0.49	1.01	1.07	17.43	19.43	8.55	5.71	1.2	1.22	1.28	1.2	2.72	2.75	13.4	13.16
IMAS-123:D08WFACXX:2:250018718	4.1	4.09	1.74	1.81	74.4	74.6	1.73	1.43	144.79	147.38	68.44	69.79	0.47	0.47	1.06	1.15	28.23	32.24	9.92	9.65	1.26	1.31	1.63	1.66	2.55	2.55	13.37	13.15
IMAS-124:D08WFACXX:2:250018719	4.61	4.7	1.37	1.27	72.78	72.92	1.95	1.65	140.84	143.11	63.65	64.34	0.45	0.45	0.97	0.98	14.77	15.82	8.7	6.18	1.16	1.14	1.31	1.26	2.8	2.85	13.89	14.26
IMAS-126:D08WFACXX:2:250018721	3.41	3.29	1.82	1.89	73.29	73.44	2.65	2.59	129.62	129.7	53.06	52.32	0.41	0.4	0.95	0.94	2.28	0.6	8.28	5.32	1.07	1	1.8	1.88	2.2	2.14	13.29	13.02
IMAS-127:D08WFACXX:2:250018722	6.41	6.79	0.78	0.46	64.67	64.36	3.61	3.81	125.21	124.83	57.51	57.44	0.45	0.45	0.81	0.67	1.83	0.03	10.23	10.51	1.25	1.29	1.69	1.74	3.7	3.89	12.98	12.39
IMAS-128:D08WFACXX:2:250018723	5.19	5.36	1.38	1.27	69.43	69.36	2.74	2.73	125.44	125.14	52.95	52.3	0.42	0.41	0.87	0.79	3.15	1.64	8.11	5.18	1.2	1.21	1.79	1.87	3.09	3.18	13.1	12.62
IMAS-129:D08WFACXX:2:250018724	2.39	2.05	1.75	1.79	69.38	69.29	5.31	6.09	119.01	117.31	55.88	55.38	0.46	0.47	0.9	0.83	4.24	2.63	7.84	3.95	1.09	1.02	1.25	1.16	1.7	1.52	13.65	13.69
IMAS-13:D08WFACXX:1:250018581	3.07	2.78	1.09	0.69	77.56	78.22	2.2	1.92	133.5	135.74	60.57	61.59	0.46	0.46	0.84	0.65	9.47	9.26	8.91	6.49	1.22	1.27	NA	NA	2.03	1.89	13.05	12.05
IMAS-130:D08WFACXX:2:250018725	4.36	4.4	1.3	1.15	67.03	66.8	4.28	4.75	144.41	146.83	58.15	58.14	0.4	0.38	0.89	0.81	20.14	22.88	8.4	5.15	1.11	1.07	1.43	1.38	2.68	2.7	13.41	13.19
IMAS-131:D08WFACXX:2:250018726	3.89	3.84	2.54	2.86	64.91	64.59	1.71	1.44	120.78	120.1	60.09	60.56	0.49	0.5	1.02	1.07	10.89	11.09	7.66	4.28	1.22	1.25	1.87	1.97	2.45	2.42	13.25	12.9
IMAS-132:D08WFACXX:2:250018727	5.61	6.1	1.15	0.89	60.34	59.31	3.49	3.81	112.82	108.57	42.29	38.47	0.4	0.38	0.95	0.94	7.87	7.02	8.64	4.33	1.56	1.9	1.6	1.61	3.3	3.55	12.96	11.91
IMAS-133:D08WFACXX:2:250018728	5.27	5.46	1.45	1.37	68.53	68.41	3.24	3.36	114.45	112.73	50.09	49.09	0.46	0.47	0.85	0.75	16.36	17.77	10.29	10.52	1.09	1.05	1.46	1.45	3.14	3.23	13.3	13.01
IMAS-134:D08WFACXX:2:250018729	4.15	4.16	1.28	1.14	62.6	62.16	3.3	3.41	141.16	143.25	56	55.86	0.4	0.38	0.95	0.95	4.74	3.6	7.85	4.39	1.09	1.05	1.7	1.75	2.58	2.58	13.16	12.75
IMAS-135:D08WFACXX:2:250018730	3.97	3.89	1.43	1.26	73.49	73.87	0.67	-0.62	99.47	90.79	45.34	42.02	0.45	0.45	0.84	0.51	9.48	8.97	12.13	24.34	1.09	0.99	1.49	1.47	2.48	2.45	13.89	14.61
IMAS-136:D08WFACXX:2:250018746	5.94	6.25	1.58	1.57	64.13	63.78	3.46	3.61	124.83	124.28	40.03	37.65	0.35	0.32	1.02	1.07	3.67	2.29	10.14	10.03	1.49	1.67	1.49	1.47	3.47	3.62	13.54	13.51
IMAS-137:D08WFACXX:2:250018731	3.33	3.2	1.67	1.69	70.23	70.18	2.41	2.29	129.87	129.95	57.28	56.95	0.45	0.45	0.89	0.83	8.69	8.4	9.49	8.23	1.07	1.01	1.28	1.19	2.17	2.1	13.5	13.42
IMAS-138:D08WFACXX:2:250018747	4.39	4.43	1.22	1.08	64.55	64.21	3.72	3.96	118.17	117.16	55.82	55.52	0.45	0.45	0.88	0.8	20	22.2	8.39	5.72	1.13	1.11	1.3	1.23	2.7	2.71	13.45	13.32
IMAS-139:D08WFACXX:2:250018732	3.92	3.88	2.4	2.7	65.98	65.72	2.06	1.87	133.08	133.87	61.27	61.64	0.45	0.45	1.05	1.13	23.21	26.11	11.05	12.5	1.3	1.37	1.68	1.72	2.46	2.44	12.65	11.74
IMAS-14:D08WFACXX:1:250018582	3.26	3.11	1.88	1.98	67.98	67.83	5.16	5.79	134.9	135.98	53.27	52.75	0.4	0.39	0.92	0.88	6.93	6.25	9.71	9.04	1.14	1.11	1.57	1.58	2.13	2.06	14.04	14.51
IMAS-140:D08WFACXX:2:250018733	4.91	5.06	1.11	0.9	63.71	63.28	2.99	3.04	115.14	112.77	47.37	45.63	0.41	0.39	0.89	0.81	32.16	37.02	11.06	12.81	1.19	1.2	1.5	1.49	2.95	3.03	12.94	12.2
IMAS-141:D08WFACXX:2:250018734	5.03	5.17	1.75	1.78	64.22	63.87	2.27	2.14	127.41	127.46	56.33	56.12	0.44	0.44	0.96	0.96	7.32	6.73	9.14	7.66	1.16	1.16	1.82	1.93	3.01	3.09	13.08	12.59
IMAS-142:D08WFACXX:2:250018735	3.6	3.47	1.88	1.97	66.5	66.26	0.89	0.29	127.97	128.29	63.15	64.05	0.48	0.49	0.88	0.79	7.58	7.06	9.59	8.65	1.18	1.18	1.36	1.3	2.3	2.24	13.5	13.42
IMAS-143:D08WFACXX:2:250018736	4.26	4.26	1.71	1.74	67.25	67.08	0.6	0.01	112.21	110.05	45.31	43.72	0.41	0.4	0.98	0.99	41.33	48.21	8.03	4.88	1.21	1.22	1.54	1.54	2.63	2.63	13.36	13.14
IMAS-144:D08WFACXX:2:250018737	6.39	7.15	1.58	1.5	64.23	63.64	3.24	3.43	119.67	117.58	46.39	44.1	0.42	0.4	0.97	0.98	15.74	18.72	7.59	0.61	1.51	1.91	1.49	1.48	3.69	4.08	13.43	13.19
IMAS-145:D08WFACXX:2:250018748	4.2	4.21	1.49	1.43	65.45	65.16	3.72	3.95	130.03	130.04	55.41	55.02	0.43	0.43	0.94	0.92	4.49	3.29	7.83	4.12	1.15	1.14	1.72	1.76	2.6	2.61	13.13	12.67
IMAS-146:D08WFACXX:2:250018749	5	5.15	2.24	2.45	64.33	63.99	1.72	1.43	122.03	120.82	55.04	54.42	0.45	0.44	0.96	0.96	10.37	10.44	7.45	3.31	1.22	1.24	1.43	1.39	3	3.08	13.43	13.29
IMAS-147:D08WFACXX:2:250018750	4.1	4.08	1.41	1.31	69.73	69.68	2.61	2.55	134.48	135.48	58.74	58.88	0.43	0.43	0.98	1	1.77	-0.02	8.3	5.55	1.1	1.05	1.55	1.56	2.55	2.54	13.56	13.54
IMAS-148:D08WFACXX:2:250018751	4.06	4.04	1.37	1.3	72.03	72.1	3.68	3.91	137.33	138.58	61.14	61.5	0.45	0.45	0.98	1	11.21	11.47	10.77	11.81	1.19	1.2	1.65	1.68	2.53	2.52	13.11	12.66
IMAS-149:D08WFACXX:2:250018752	5.54	5.78	1.48	1.44	60.97	60.43	2.51	2.41	107.61	104.91	53.31	52.85	0.48	0.49	1	1.04	7.24	6.63	10.9	12.11	1.2	1.22	1.51	1.49	3.27	3.39	13	12.43
IMAS-15:D08WFACXX:1:250018583	4.47	4.52	1.06	0.84	66.73	66.51	4.28	4.7	131.49	132.09	53.55	53.07	0.41	0.4	0.83	0.71	4.78	3.64	10.5	11.41	1.08	1.03	1.47	1.46	2.74	2.76	13.7	13.84
IMAS-150:D08WFACXX:2:250018753	4.04	4.01	1.61	1.59	63	62.59	3.1	3.17	142.07	143.98	56.22	55.94	0.39	0.37	0.97	0.97	3.2	1.73	9.01	7.47	1.38	1.49	1.42	1.39	2.52	2.51	12.83	12.09
IMAS-151:D08WFACXX:2:250018754	5.02	5.17	1.79	1.85	67.53	67.35	2.17	2	124.53	123.67	57.05	56.66	0.46	0.46	0.95	0.93	3.85	2.5	8.05	4.82	1.43	1.58	1.69	1.73	3.01	3.09	13.4	13.22
IMAS-152:D08WFACXX:2:250018755	3.59	3.41	1.69	1.7	70.49	70.46	1.84	1.39	118.48	115.11	55.47	54.47	0.46	0.47	0.95	0.92	7.63	6.7	10.99	14.04	1.12	1.08	1.5	1.51	2.29	2.2	13.7	13.88
IMAS-153:D08WFACXX:2:250018756	3.68	3.62	2.15	2.32	75.78	76.08	1.01	0.52	115.03	113.08	59.4	59.48	0.5	0.51	0.98	0.99	3.74	2.38	13.24	17.97	1.1	1.05	1.25	1.15	2.34	2.31	13.15	12.72
IMAS-154:D08WFACXX:2:250018757	4.79	4.89	1.33	1.19	68.29	68.18	4.02	4.35	127.84	127.93	62.95	63.57	0.48	0.49	0.92	0.89	4.4	3.19	11.4	13.41	1.2	1.21	1.81	1.89	2.89	2.95	13.18	12.79
IMAS-155:D08WFACXX:2:250018758	5.3	5.51	1.55	1.54	69.18	69.1	2.76	2.73	103.56	99.97	51.49	50.59	0.49	0.51	0.95	0.95	4.24	2.99	10.69	11.46	1.18	1.18	1.55	1.55	3.15	3.26	13.82	14.05
IMAS-156:D08WFACXX:2:250018759	4.59	4.66	1.17	1	68.36	68.26	2.67	2.63	103.12	99.31	47.41	46.03	0.45	0.45	0.99	1.02	44.39	51.93	13.34	18.41	1.76	2.11	1.54	1.54	2.8	2.83	12.99	12.41
IMAS-157:D08WFACXX:2:250018760	4.16	4.16	2.17	2.38	69.31	69.22	0.65	0.07	136.94	138.19	61.78	62.17	0.45	0.45	0.95	0.94	14.47	15.46	8.1	5.18	1.1	1.06	1.41	1.37	2.58	2.58	13.09	12.62
IMAS-158:D08WFACXX:2:250018761	4.27	4.3	2.45	2.77	68.43	68.29	1.34	0.94	119.19	117.72	54.61	54.03	0.45	0.44	1.11	1.25	5.01	3.91	8.44	5.67	1.24	1.29	1.6	1.62	2.63	2.65	12.71	11.83
IMAS-159:D08WFACXX:2:250018762	3.96	3.9	0.77	0.09	70.84	70.89	1.84	1.42	123.99	123.26	61.57	62.63	0.47	0.48	0.94	0.91	3.49	1.09	9.32	7.84	1.2	1.23	NA	NA	2.48	2.45	13.91	14.52
IMAS-16:D08WFACXX:1:250018584	5.75	6.02	1.91	2.02	66.41	66.17	4.44	4.89	140.11	141.89	68.94	70.28	0.47	0.47	1	1.04	5.12	4.06	11.65	14	1.17	1.17	1.47	1.47	3.37	3.51	13.79	13.99
IMAS-160:D08WFACXX:2:250018763	4.2	4.21	1.85	1.92	67.52	67.34	1.71	1.42	142.02	144.1	61.84	62.23	0.43	0.42	0.96	0.96	5.54	4.58	8.12	5.05	1.2	1.21	1.75	1.81	2.6	2.61	13.51	13.41
IMAS-161:D08WFACXX:2:250018764	4.76	4.91	1.21	0.88	68.51	68.3	3.06	3.21	117.77	114.55	49.23	46.91	0.42	0.4	0.9	0.81	5.48	3.83	9.66	9.22	1.14	1.11	NA	NA	2.88	2.95	14.42	15.85
IMAS-162:D08WFACXX:2:250018765	4.34	4.37	1.41	1.34	69.1	69.03	2.93	2.95	126.82	126.47	58.52	58.53	0.46	0.47	1	1.03	16.4	17.83	10.62	11.86	1.11	1.08	1.6	1.62	2.67	2.69	13.44	13.28
IMAS-163:D08WFACXX:2:250018766	3.7	3.64	1.47	1.39	72.09	72.17	1.73	1.44	107.6	104.49	46.44	44.8	0.43	0.43	1.07	1.16	2.34	0.68	6.62	1.4	1.4	1.54	1.9	2	2.35	2.32	13.84	14.1
IMAS-164:D08WFACXX:2:250018767	3.63	3.51	2.46	2.78	70.97	71.02	0.89	0.3	131.78	132.58	65.72	67.04	0.49	0.51	1.17	1.4	7.92	7.47	9.41	8.15	1.19	1.2	1.33	1.27	2.31	2.26	13.79	14.08
IMAS-165:D08WFACXX:2:250018768	4.25	4.26	1.34	1.25	65.66	65.38	0.34	-0.3	123.69	122.98	62.45	62.95	0.48	0.49	1.08	1.19	31.21	35.87	7.91	4.59	1.21	1.24	1.47	1.45	2.63	2.63	13.34	13.09
IMAS-166:D08WFACXX:2:250018769	4.65	4.73	1.57	1.56	64.15	63.77	2.59	2.53	130.08	130.55	52.37	51.69	0.41	0.39	1.17	1.36	5.33	4.31	8.33	5.5	1.13	1.1	1.43	1.4	2.82	2.86	13.4	13.2
IMAS-167:D08WFACXX:2:250018770	4.28	4.32	1.51	1.42	67.68	67.42	3.77	4.25	127.98	127.91	54.43	53.65	0.42	0.41	1.02	1.14	10.63	10.8	9.53	8.35	1.45	1.77	2.1	2.29	2.64	2.66	13.38	13.03
IMAS-168:D08WFACXX:2:250018771	4.95	5.09	1.47	1.41	66.41	66.17	-0.03	-0.8	119.19	117.89	47.78	46.46	0.41	0.4	1.08	1.19	44.17	51.66	7.48	3.19	1.12	1.09	1.32	1.25	2.98	3.05	12.97	12.35
IMAS-169:D08WFACXX:2:250018772	5.73	6	0.95	0.67	64.99	64.66	3.28	3.41	119.92	119.05	49.87	48.92	0.42	0.41	0.9	0.84	12.15	12.66	7.98	4.42	1.17	1.17	1.39	1.32	3.36	3.5	13.53	13.47
IMAS-17:D08WFACXX:1:250018615	4.02	3.99	2.02	2.12	69.21	69.12	2.37	2.25	119.09	117.29	60.66	60.71	0.49	0.5	1.08	1.18	3.55	2.14	10.7	11.83	1.09	1.03	1.63	1.65	2.51	2.49	13.08	12.58
IMAS-170:D08WFACXX:2:250018773	3.54	3.42	1.58	1.53	64.46	64.06	2.38	2.23	106.4	103.35	43.18	41.26	0.4	0.38	1	1.04	8.21	7.67	9.04	7.03	1.11	1.06	1.71	1.75	2.27	2.21	13.35	13.07
IMAS-171:D08WFACXX:2:250018774	4.2	4.2	1.07	0.86	67.98	67.84	3.7	3.93	112.96	110.73	51.25	50.36	0.45	0.45	0.93	0.9	49.47	58.12	9.88	9.31	1.21	1.23	1.41	1.37	2.6	2.6	13.42	13.26
IMAS-172:D08WFACXX:2:250018775	4.77	4.87	1.46	1.41	60.33	59.76	1.37	0.98	99.09	94.8	40.47	38.26	0.41	0.4	0.98	1	6.65	5.93	7.54	3.42	1.15	1.14	1.52	1.52	2.88	2.93	13.52	13.46
IMAS-173:D08WFACXX:2:250018776	4.24	4.27	0.98	0.61	63.69	63.02	3.02	3.12	102.02	94.17	46.8	43.9	0.47	0.49	1.04	1.18	70.64	92.75	16.34	36.04	1.24	1.3	1.49	1.47	2.62	2.64	13.27	12.72
IMAS-174:D08WFACXX:2:250018777	6.15	6.82	1.49	1.39	66.45	66.03	2.27	2.04	119.43	117.56	54.25	53.48	0.45	0.44	1.06	1.23	9.24	8.63	8.79	4.88	1.07	0.94	1.54	1.54	3.58	3.91	13.26	12.69
IMAS-175:D08WFACXX:2:250018778	3.86	3.81	2.52	2.82	63.24	62.83	0.17	-0.54	136.46	137.6	54.03	53.45	0.41	0.39	0.97	0.97	14.12	15.03	7.39	3.21	1.17	1.17	1.44	1.39	2.43	2.41	13.78	13.98
IMAS-176:D08WFACXX:2:250018779	5.29	5.48	1.91	1.99	66.11	65.88	0.76	0.21	126.11	125.47	56.58	56.2	0.44	0.44	1.05	1.13	57.98	68.51	8.98	7.43	1.06	0.99	1.44	1.41	3.14	3.24	13.07	12.57
IMAS-177:D08WFACXX:2:250018780	4.5	4.56	2.14	2.33	66.61	66.4	2.2	2.04	115.76	114.06	45.5	43.91	0.41	0.39	0.96	0.95	9.22	9.05	8.5	5.96	1.12	1.09	1.51	1.49	2.75	2.78	13.06	12.56
IMAS-178:D08WFACXX:2:250018781	3.69	3.62	1.6	1.58	66.15	65.92	1.44	1.07	121.5	120.3	50.77	49.78	0.43	0.42	0.95	0.93	3.59	2.2	10.76	11.67	1.16	1.15	1.47	1.45	2.35	2.31	13.96	14.32
IMAS-179:D08WFACXX:2:250018782	5.56	6.03	1.49	1.43	66.61	66.22	1.77	1.28	105.76	101.06	42.9	40.1	0.42	0.4	0.93	0.86	23.3	28.06	9	6.03	1.27	1.35	1.54	1.55	3.28	3.52	13.67	13.82
IMAS-18:D08WFACXX:1:250018616	3.76	3.67	1.81	1.88	70.57	70.57	3.26	3.41	159.37	164.67	66.37	67.63	0.42	0.4	0.93	0.9	3.64	2.25	8.61	5.86	1.59	1.83	1.69	1.72	2.38	2.33	13.49	13.39
IMAS-180:D08WFACXX:2:250018783	4.24	4.26	1.38	1.28	68.88	68.73	1.47	0.97	107.51	102.69	46.69	44.4	0.45	0.45	0.92	0.86	48.1	58.53	13.25	20.72	1.39	1.54	1.53	1.53	2.62	2.63	13.29	12.89
IMAS-181:D08WFACXX:2:250018784	4.31	4.35	1.73	1.75	65.86	65.55	4.07	4.45	111.65	108.88	48.79	47.39	0.48	0.49	0.96	0.97	6.66	5.93	8.25	4.92	1.5	1.69	1.5	1.51	2.65	2.67	13.1	12.54
IMAS-182:D08WFACXX:2:250018785	3.7	3.62	1.1	0.9	67.89	67.74	0.73	0.19	125.62	125.58	55.91	55.82	0.44	0.44	1.05	1.12	8.71	8.46	11.39	13.68	1.07	1	1.41	1.37	2.35	2.31	13.29	13
IMAS-183:D08WFACXX:2:250018786	3.34	3.21	1.79	1.85	70.27	70.25	-0.33	-1.18	123.38	122.65	55.13	54.84	0.44	0.44	1.03	1.1	12.88	13.52	7.84	4.23	1.19	1.21	1.43	1.38	2.17	2.1	13.49	13.39
IMAS-184:D08WFACXX:2:250018787	5.84	6.2	1.87	1.98	69.09	68.97	-0.5	-1.54	115.07	113.06	52.88	52.27	0.45	0.46	1.1	1.26	18.32	20.56	7.47	2.53	1.1	1.04	1.72	1.77	3.42	3.6	13.72	13.84
IMAS-185:D08WFACXX:2:250018788	4.97	5.11	1.44	1.34	72.69	72.79	-0.37	-1.22	135.99	137.11	48.47	47.19	0.38	0.36	1.13	1.29	4.68	3.52	9.1	7.5	1.09	1.04	1.91	2.03	2.99	3.05	13.59	13.59
IMAS-186:D08WFACXX:2:250018789	3.5	3.39	2.42	2.73	70.68	70.7	-0.17	-0.97	152.51	155.9	73.6	75.5	0.47	0.48	1.19	1.4	2.56	0.92	6.88	1.94	1.06	0.99	1.51	1.5	2.25	2.2	13.27	12.98
IMAS-187:D08WFACXX:2:250018790	4.29	4.31	1.2	1.05	73.67	73.87	0.17	-0.64	119.47	118.16	48.94	47.7	0.42	0.41	1.06	1.16	8.29	7.91	9.48	8.37	1.22	1.24	1.61	1.63	2.64	2.65	13.47	13.36
IMAS-188:D08WFACXX:2:250018791	3.74	3.67	1.93	2.04	70.86	70.87	-0.21	-1.02	134.36	135.3	61.32	61.72	0.44	0.43	1.13	1.28	2.5	0.86	9.82	9.41	1.07	1	1.46	1.44	2.37	2.33	12.96	12.32
IMAS-189:D08WFACXX:2:250018792	4.6	4.66	1.65	1.66	67.48	67.32	1.73	1.44	125.42	125.22	55.56	55.2	0.44	0.44	1.17	1.37	7.9	7.44	8.99	7.32	1.13	1.1	1.41	1.39	2.8	2.83	13.34	13.09
IMAS-19:D08WFACXX:1:250018617	4.4	4.45	1.63	1.63	63.11	62.63	3.11	3.21	113.42	111.36	47.79	46.59	0.42	0.4	0.96	0.96	21.25	24.3	11.95	15.49	1.65	1.99	1.77	1.83	2.7	2.73	12.8	11.9
IMAS-190:D08WFACXX:2:250018793	3.77	3.7	2.34	2.63	72.4	72.48	-0.65	-1.55	127.28	127.22	64.72	65.42	0.49	0.5	1.11	1.25	1.8	0	8.51	6.38	1.08	1.02	1.58	1.59	2.39	2.35	13.73	13.87
IMAS-191:D08WFACXX:2:250018794	4.79	4.9	1.99	2.12	73.81	73.99	-0.03	-0.79	113.1	111.03	51.92	51.22	0.46	0.46	1.09	1.21	1.82	0.03	7.37	3.06	1.11	1.06	1.16	1.04	2.89	2.95	13.79	14
IMAS-192:D08WFACXX:2:250018795	6.15	6.49	1.58	1.54	69.86	69.82	-0.03	-0.8	116.06	114.28	48.67	47.51	0.43	0.42	0.97	0.97	7.64	7.12	8.9	6.94	1.21	1.23	1.77	1.84	3.58	3.75	13.56	13.52
IMAS-193:D08WFACXX:3:250018827	5.05	5.53	1.51	1.42	72.89	73.16	-0.35	-2.31	112.79	108.37	53.14	51.86	0.46	0.47	1.11	1.53	4.21	0.87	9.57	7.65	1.81	2.56	1.45	1.44	3.02	3.26	13.48	13.24
IMAS-194:D08WFACXX:3:250018828	7.15	7.66	1.15	0.98	70.25	70.2	-1.72	-2.93	118.76	117.43	53.16	52.56	0.45	0.45	1.02	1.07	1.77	-0.01	7.72	4.11	1.16	1.15	1.46	1.44	4.08	4.33	13.19	12.81
IMAS-195:D08WFACXX:3:250018829	4.1	4.09	1.5	1.46	73.98	74.15	1.19	0.77	104.95	101.67	44.24	42.57	0.43	0.42	1.03	1.09	7.59	7.07	8.67	6.98	1.07	1	1.46	1.42	2.55	2.54	13.59	13.58
IMAS-196:D08WFACXX:3:250018865	4.2	4.2	1.68	1.71	71.86	71.92	3.3	3.43	123.47	122.55	58.35	58.33	0.45	0.45	0.87	0.79	10.92	11.14	6.62	1.31	1.07	1.01	1.51	1.49	2.6	2.6	13.58	13.58
IMAS-197:D08WFACXX:3:250018866	4.28	4.3	1.37	1.26	72.91	73.04	1.32	0.93	119.3	118.13	58.42	58.43	0.49	0.5	1.07	1.16	5.6	4.63	11.19	12.93	1.11	1.07	1.24	1.15	2.64	2.65	12.79	12.01
IMAS-198:D08WFACXX:3:250018830	6.41	6.79	1.55	1.54	69.36	69.27	1.52	1.17	125.11	124.24	57.07	56.68	0.46	0.46	1.13	1.29	3.27	1.8	7.3	2.83	1.1	1.05	1.36	1.3	3.71	3.9	13.79	13.99
IMAS-199:D08WFACXX:3:250018867	3.38	3.23	2.22	2.44	74.37	74.59	0.21	-0.48	138.32	139.73	72.13	73.86	0.49	0.5	0.99	1.02	7.25	6.65	7.19	2.7	1.09	1.04	1.33	1.25	2.19	2.12	13.3	13.02
IMAS-2:D08WFACXX:1:250018574	3	2.8	2.09	2.25	76.94	77.31	3.1	3.19	132.11	132.59	59.95	60.21	0.45	0.44	0.94	0.92	4.05	2.77	8.29	5.66	1.18	1.19	1.49	1.48	2	1.9	14.41	15.23
IMAS-20:D08WFACXX:1:250018585	4.7	4.79	2.15	2.35	71.37	71.4	3.68	3.92	131.35	131.71	69.82	71.17	0.5	0.51	0.97	0.99	11.98	12.42	13.13	17.66	1.31	1.38	1.89	1.99	2.85	2.89	13.24	12.87
IMAS-200:D08WFACXX:3:250018831	3.95	3.92	1.97	2.08	64.05	63.68	5.9	6.73	114.98	113.44	49.51	48.49	0.43	0.42	0.91	0.87	4.65	3.48	14.13	20.55	1.13	1.1	1.34	1.28	2.48	2.46	13	12.42
IMAS-201:D08WFACXX:3:250018868	4.23	4.23	1.72	1.78	68.25	68.14	4.46	4.9	118.23	117.01	55.19	54.97	0.46	0.46	1	1.03	14.95	16.03	9.75	9.18	1.13	1.1	1.43	1.41	2.61	2.61	13.51	13.43
IMAS-202:D08WFACXX:3:250018832	5.21	5.38	1.54	1.5	66.05	65.81	4.81	5.35	110.39	107.89	47.57	46.34	0.44	0.43	0.96	0.95	3.66	2.28	10.94	12.2	1.38	1.5	1.58	1.6	3.1	3.19	13.54	13.49
IMAS-203:D08WFACXX:3:250018833	6.25	6.61	1.25	1.11	62.96	62.55	2.77	2.74	125.55	125.2	51.15	50.37	0.44	0.43	0.95	0.94	22.79	25.6	9.13	7.67	1.16	1.16	1.62	1.66	3.63	3.8	13.45	13.33
IMAS-204:D08WFACXX:3:250018834	5.65	5.89	1.11	0.93	63.96	63.61	1.86	1.6	105.32	102.61	42.07	40.35	0.41	0.39	0.89	0.81	7.34	6.78	9.29	8.24	1.17	1.16	1.5	1.48	3.33	3.45	13.29	12.99
IMAS-205:D08WFACXX:3:250018835	5.86	6.14	1.27	1.13	66.27	66.02	3.07	3.14	125.54	125.24	54.31	53.72	0.43	0.42	0.99	1.02	3.74	2.37	8.59	6.14	1.29	1.36	1.51	1.49	3.43	3.57	13.08	12.57
IMAS-206:D08WFACXX:3:250018836	6.71	7.6	1.58	1.51	65.82	65.17	0.86	-0.34	124.13	122.72	50.08	48.05	0.41	0.38	0.97	0.99	8.48	7.46	11.13	14.52	1.24	1.38	2.45	3.01	3.85	4.3	13.59	13.6
IMAS-207:D08WFACXX:3:250018837	5.25	5.81	1.44	1.31	67	66.56	2.15	1.84	135.25	136.86	53.32	52.27	0.4	0.37	0.95	0.89	2.59	-1.66	9.45	7.03	1.27	1.37	1.89	1.97	3.13	3.4	13.22	12.49
IMAS-208:D08WFACXX:3:250018838	4.9	5.02	1.25	1.11	71.12	71.16	2.85	2.86	124.68	124.67	66.52	67.66	0.49	0.51	0.86	0.76	1.77	-0.03	9.76	9.11	1.15	1.13	1.51	1.51	2.95	3.01	13.85	14.1
IMAS-209:D08WFACXX:3:250018869	4.09	4.08	1.32	1.2	73.44	73.62	2.09	1.9	142.24	144.3	54.48	53.99	0.39	0.38	0.84	0.73	4.52	3.33	11.74	14.45	1.15	1.13	1.43	1.38	2.55	2.54	13.69	13.83
IMAS-21:D08WFACXX:1:250018586	3.31	3.16	1.72	1.75	65.68	65.41	0.75	0.19	131.73	132.36	62.01	62.52	0.46	0.47	0.94	0.92	4.44	3.24	12.86	17.1	1.09	1.04	1.33	1.28	2.16	2.08	14.19	14.78
IMAS-210:D08WFACXX:3:250018870	4.15	4.15	1.23	1.09	73.51	73.66	2.59	2.53	139.04	140.94	56.46	56.36	0.42	0.41	0.95	0.94	3.3	1.85	14.83	22.06	1.21	1.24	1.61	1.63	2.57	2.58	14.51	15.41
IMAS-211:D08WFACXX:3:250018871	5.93	6.23	1.65	1.68	73.14	73.28	1.35	0.95	129.24	129.25	54.79	54.3	0.42	0.42	0.94	0.92	6.83	6.14	8.2	5.19	1.15	1.13	1.45	1.41	3.47	3.61	13.11	12.64
IMAS-212:D08WFACXX:3:250018839	4.12	4.12	2.06	2.23	73.86	74.03	2.91	2.94	118.4	116.75	58.23	58.08	0.48	0.48	1.03	1.09	2.84	1.28	7.17	2.67	1.09	1.04	1.24	1.14	2.56	2.56	13.83	14.07
IMAS-213:D08WFACXX:3:250018840	5.35	5.96	1.27	0.96	76.38	77.12	3.62	4.16	125.01	124.5	57.02	56.88	0.46	0.46	0.82	0.42	4.24	0.92	10.17	11.18	1.25	1.34	1.49	1.47	3.18	3.48	13.57	13.54
IMAS-214:D08WFACXX:3:250018841	3.65	3.56	2.12	2.29	70.79	70.81	3.23	3.35	113.67	111.71	50.33	49.34	0.45	0.46	0.98	0.99	2.78	1.19	10.1	10.13	1.13	1.11	1.59	1.6	2.33	2.28	13.96	14.32
IMAS-215:D08WFACXX:3:250018842	5.05	5.52	1.72	1.78	70.05	69.97	2.43	2.19	115.36	111.13	50	47.75	0.44	0.43	0.97	0.98	2.59	-1.65	10.85	14.9	1.34	1.55	1.42	1.37	3.03	3.26	14.08	15.21
IMAS-216:D08WFACXX:3:250018843	4.85	5.09	1.58	1.56	74.77	75.19	2.05	1.7	130.48	131.45	66.06	67.85	0.48	0.5	0.93	0.87	6.65	4.64	8.92	5.67	1.18	1.19	1.22	1.11	2.92	3.05	13.72	13.93
IMAS-217:D08WFACXX:3:250018872	5.18	5.35	1.64	1.63	74.39	74.6	1.36	0.99	123.73	123.02	65.48	66.45	0.51	0.53	0.93	0.89	7.12	6.49	9.02	7.47	1.11	1.08	1.41	1.39	3.09	3.17	13.64	13.68
IMAS-218:D08WFACXX:3:250018844	5.48	5.76	1.1	0.84	73.54	73.73	3.57	3.8	129.7	129.63	68.79	69.82	0.51	0.53	0.9	0.83	6.39	5.37	8.96	6.87	1.13	1.09	1.38	1.34	3.24	3.38	13.76	13.94
IMAS-219:D08WFACXX:3:250018845	4.16	4.15	1.98	2.13	71.35	71.39	2.63	2.59	146.27	149.3	62.49	63.21	0.44	0.43	0.94	0.92	16.63	18.1	7.67	3.74	1.07	1.01	1.32	1.23	2.58	2.58	13.02	12.46
IMAS-22:D08WFACXX:1:250018587	4.34	4.38	1.21	1.04	76.69	77.01	2.12	1.92	143.23	145.3	72.96	74.57	0.49	0.5	0.83	0.7	9.1	8.91	12.98	17.72	1.08	1.03	1.47	1.46	2.67	2.69	13.77	13.96
IMAS-220:D08WFACXX:3:250018846	4.2	4.2	1.94	2.06	75.29	75.54	2.83	2.84	132.49	133.08	60.54	60.88	0.45	0.45	1.09	1.21	2.69	1.09	11.24	12.98	1.4	1.53	1.38	1.34	2.6	2.6	14.17	14.75
IMAS-221:D08WFACXX:3:250018847	3.67	3.58	1.18	1.01	75.59	75.86	3.7	3.93	113.43	111.08	58.75	58.68	0.5	0.51	1.02	1.09	6.88	6.2	6.78	1.5	1.2	1.22	1.57	1.57	2.34	2.29	13.39	13.18
IMAS-222:D08WFACXX:3:250018848	4.4	4.45	2.06	2.25	69.97	69.94	3	3.04	146.13	148.67	76.27	78.44	0.49	0.5	0.98	0.99	13.69	14.5	7.2	2.51	1.21	1.23	1.34	1.27	2.7	2.72	13.36	13.14
IMAS-224:D08WFACXX:3:250018850	3.97	3.95	1.35	1.24	72.03	72.11	3.98	4.32	151.2	154.74	67.63	68.81	0.45	0.45	0.89	0.8	2.3	0.6	7.99	3.85	1.13	1.1	1.42	1.38	2.48	2.47	13.44	13.26
IMAS-225:D08WFACXX:3:250018851	4.34	4.37	1.9	2.01	73.46	73.61	0.43	-0.19	130.31	130.38	54.48	53.86	0.42	0.41	1.11	1.24	4.76	3.62	6.92	1.97	1.16	1.15	1.5	1.48	2.67	2.68	13.45	13.3
IMAS-226:D08WFACXX:3:250018852	4.05	4.04	1.43	1.34	69.02	68.93	1.72	1.43	118.56	117.04	53.47	52.87	0.45	0.45	0.98	1.01	11.69	12.07	8.42	5.58	1.08	1.03	1.43	1.4	2.52	2.52	13.39	13.18
IMAS-227:D08WFACXX:3:250018853	3.93	3.9	1.31	1.18	73.57	73.72	1.54	1.2	122.61	121.76	49.17	48.02	0.41	0.4	1.08	1.19	5.3	4.27	10.41	10.89	1.38	1.5	1.81	1.88	2.47	2.45	13.54	13.5
IMAS-228:D08WFACXX:3:250018854	3.85	3.8	1.5	1.47	70.12	70.1	3.48	3.66	107.38	104.3	44.02	42.28	0.42	0.4	0.93	0.91	4.11	2.82	11.13	13.18	1.07	1	1.53	1.52	2.43	2.4	13.7	13.81
IMAS-229:D08WFACXX:3:250018855	3.32	3.18	1.78	1.83	73.61	73.78	1.04	0.57	112.13	109.93	43.92	42.17	0.4	0.39	1.01	1.06	9.49	9.38	9.16	7.72	1.07	1.01	1.31	1.24	2.16	2.09	13.47	13.36
IMAS-23:D08WFACXX:1:250018588	3.95	3.89	1.24	0.88	61.09	60.17	3.35	3.62	128.32	128.34	44.75	41.34	0.37	0.33	0.86	0.7	4.22	2.08	27.45	72.23	1.13	1.07	NA	NA	2.48	2.45	12.96	11.63
IMAS-230:D08WFACXX:3:250018856	3.69	3.62	1.71	1.73	70.02	69.98	1.19	0.75	130.1	130.5	58.66	58.68	0.43	0.42	1	1.03	2.6	0.98	7.73	4.13	1.3	1.38	1.7	1.75	2.35	2.31	13.47	13.39
IMAS-231:D08WFACXX:3:250018857	4.77	4.88	1.68	1.67	72.64	72.75	1.73	1.45	124.56	123.98	61.29	61.57	0.48	0.49	1.04	1.12	25.92	29.42	8.48	6.52	1.33	1.43	1.33	1.28	2.88	2.94	13.44	13.31
IMAS-232:D08WFACXX:3:250018873	4.22	4.21	1.27	1.15	75.8	76.09	4.79	5.36	121.63	121.1	56.11	56.09	0.46	0.47	0.91	0.87	24.73	27.96	10.98	12.36	1.08	1.02	1.35	1.3	2.61	2.61	14.13	14.69
IMAS-233:D08WFACXX:3:250018858	4.43	4.47	1.28	1.17	77.6	77.99	3.41	3.58	127.27	126.81	58.29	58.15	0.46	0.47	0.93	0.89	5.03	3.96	8.25	5.43	1.1	1.05	1.15	1.02	2.71	2.73	14.24	14.87
IMAS-234:D08WFACXX:3:250018874	6.66	7.08	0.93	0.67	75.49	75.76	3.44	3.62	133.25	133.94	67.21	68.33	0.48	0.49	0.85	0.75	14.6	15.63	18.68	32.01	1.11	1.07	1.49	1.47	3.83	4.04	14.07	14.56
IMAS-236:D08WFACXX:3:250018860	5.31	5.5	1.8	1.87	66.33	66.1	3.51	3.73	117.12	115.79	47.41	46.18	0.41	0.4	1.02	1.08	3.36	1.9	8.1	5.19	1.17	1.16	1.46	1.44	3.15	3.25	13.16	12.74
IMAS-237:D08WFACXX:3:250018861	3.49	3.36	1.58	1.58	73.84	74.03	1.65	1.33	109.23	106.58	52.97	52.26	0.47	0.47	0.93	0.9	9.68	9.62	9.54	8.55	1.15	1.13	1.41	1.38	2.25	2.18	13.64	13.69
IMAS-238:D08WFACXX:3:250018862	4.3	4.31	1.41	1.33	71.15	71.19	3.48	3.66	127.85	127.65	54.73	54.17	0.43	0.42	1.03	1.1	24.44	27.61	7.95	4.67	1.35	1.45	1.48	1.46	2.65	2.66	13.35	13.12
IMAS-239:D08WFACXX:3:250018863	3.71	3.62	1.55	1.51	76.25	76.56	6.55	7.55	125.51	125.22	62.74	63.29	0.49	0.5	0.93	0.9	6.27	5.45	7.34	3.09	1.09	1.04	1.3	1.23	2.35	2.31	14.32	15.04
IMAS-24:D08WFACXX:1:250018589	3.16	2.99	1.59	1.58	71.48	71.53	1.21	0.78	125.23	124.71	54.36	53.68	0.43	0.42	0.96	0.96	6.07	5.22	8.24	5.36	1.12	1.08	1.91	2.01	2.08	2	13.91	14.24
IMAS-240:D08WFACXX:3:250018864	4.07	4.06	1.82	1.87	75.55	75.82	3.65	3.88	125.72	125.49	64.23	65.03	0.49	0.5	1.02	1.08	2.66	1.08	7.51	3.31	1.09	1.05	1.36	1.3	2.54	2.53	13.71	13.81
IMAS-241:D08WFACXX:3:250018875	3.64	3.5	2	2.3	74.8	75.2	1.47	0.87	133.01	134.63	60.39	61.03	0.44	0.43	0.94	0.9	5.96	4.47	9.81	9.22	1.25	1.33	NA	NA	2.32	2.25	13.53	13.45
IMAS-242:D08WFACXX:3:250018876	4.27	4.29	2.12	2.34	67.79	67.65	1.34	0.94	145.63	148.21	58.77	58.9	0.41	0.4	1.12	1.26	12.54	13.09	10.04	9.92	1.2	1.21	1.57	1.56	2.64	2.64	12.9	12.22
IMAS-243:D08WFACXX:3:250018877	3.89	3.81	1.57	1.53	75.11	75.57	0.77	-0.2	134.19	136.79	61.98	63.27	0.44	0.43	0.99	1.03	3.41	0.91	9.68	8.57	1.35	1.51	1.46	1.45	2.45	2.4	14.51	16.16
IMAS-244:D08WFACXX:3:250018878	3.14	2.98	1.58	1.54	70.61	70.61	3.75	3.98	136.17	137.16	61.34	61.73	0.45	0.45	0.95	0.95	25.36	28.75	8.76	6.78	1.16	1.15	1.5	1.49	2.07	1.99	13.46	13.36
IMAS-245:D08WFACXX:3:250018879	3.63	3.55	1.84	1.9	70.04	70.02	2.79	2.81	119.84	119.06	49.5	48.82	0.42	0.41	0.93	0.9	10.79	10.96	8.37	6.02	1.15	1.14	1.8	1.86	2.32	2.27	13.74	13.89
IMAS-246:D08WFACXX:3:250018880	3.43	3.29	1.84	1.92	69.5	69.44	4.45	4.9	127.96	128.03	57.87	57.84	0.45	0.45	1	1.03	15.61	16.83	12.32	15.71	1.1	1.05	1.52	1.5	2.21	2.14	13.49	13.39
IMAS-247:D08WFACXX:3:250018881	3.77	3.7	1.78	1.85	69.83	69.77	2.61	2.54	134.41	135.43	64.5	65.3	0.48	0.49	0.95	0.93	14.16	15.09	10.54	11.01	1.12	1.09	1.42	1.38	2.39	2.35	13.26	12.93
IMAS-248:D08WFACXX:3:250018882	4.45	4.49	2.05	2.22	65.13	64.84	2.24	2.08	121.15	120.3	57.25	57.17	0.45	0.45	0.97	0.98	14.16	15.1	8.95	7	1.13	1.11	1.55	1.55	2.72	2.75	13.85	14.09
IMAS-249:D08WFACXX:3:250018883	4.06	4.03	2.13	2.32	70.46	70.46	2.07	1.89	130.32	130.89	54.03	53.6	0.42	0.41	0.93	0.91	15.27	16.44	9.7	9.19	1.06	0.99	1.44	1.41	2.53	2.52	13.26	12.94
IMAS-25:D08WFACXX:1:250018618	3.8	3.73	2.12	2.3	69.67	69.61	0.74	0.2	125.95	125.75	58.46	58.55	0.46	0.46	1.04	1.11	2.45	0.8	9.94	9.67	1.06	0.99	1.76	1.83	2.4	2.37	14.65	15.68
IMAS-250:D08WFACXX:3:250018884	2.96	2.75	1.71	1.74	67.01	66.82	1.28	0.85	124.12	123.68	51.8	51.11	0.42	0.42	1.1	1.22	9.82	9.78	10.09	10.12	1.36	1.46	1.53	1.51	1.98	1.87	13.42	13.28
IMAS-251:D08WFACXX:3:250018885	3.21	3.02	1.7	1.72	68.37	68.23	1.9	1.62	127.12	126.71	51.42	50.22	0.41	0.4	0.99	1.03	18.18	19.97	10.82	12.17	1.08	1.02	1.46	1.42	2.11	2.01	13.69	13.82
IMAS-252:D08WFACXX:3:250018886	3.84	3.8	1.56	1.53	67.51	67.33	2.82	2.82	124.15	123.56	54.61	54.21	0.45	0.44	0.89	0.82	16.38	17.8	10.72	11.63	1.17	1.17	1.51	1.5	2.42	2.4	13.35	13.11
IMAS-253:D08WFACXX:3:250018887	3.74	3.67	1.69	1.7	68.5	68.39	3.08	3.14	121.99	121.23	58.2	58.22	0.46	0.47	1.04	1.12	5.62	4.66	10.58	11.21	1.14	1.13	1.89	2	2.37	2.34	13.93	14.28
IMAS-254:D08WFACXX:3:250018888	3.86	3.8	2.02	2.18	67.78	67.65	2.12	1.96	137.5	139.19	60.17	60.56	0.44	0.43	1.06	1.15	18.19	20.01	10.38	10.88	1.23	1.27	1.65	1.7	2.43	2.4	13.25	12.93
IMAS-255:D08WFACXX:3:250018889	3.75	3.68	2.32	2.59	69.52	69.47	2.82	2.83	137.77	139.3	59.14	59.37	0.44	0.43	1	1.03	8.96	8.72	10.82	11.98	1.2	1.21	1.59	1.6	2.37	2.34	13.78	13.97
IMAS-256:D08WFACXX:3:250018890	3.99	3.96	1.98	2.13	71.28	71.31	1.89	1.64	129.31	129.27	55.54	55.05	0.43	0.43	0.95	0.94	17.86	19.58	12.36	15.84	1.35	1.47	1.51	1.51	2.5	2.48	13.73	13.89
IMAS-257:D08WFACXX:3:250018891	3.94	3.91	2.06	2.23	69.87	69.81	4.39	4.8	127.71	127.57	62.02	62.48	0.47	0.48	0.98	1	17.57	19.22	7.34	2.93	1.16	1.15	1.7	1.76	2.47	2.45	13.23	12.87
IMAS-258:D08WFACXX:3:250018892	3.71	3.63	1.53	1.5	72.54	72.66	3.36	3.51	117.61	116.45	55.37	55.22	0.46	0.46	0.91	0.86	28.32	32.36	9.74	9.08	1.07	1	2	2.14	2.36	2.31	13.84	14.13
IMAS-259:D08WFACXX:3:250018893	3.07	2.87	2.17	2.38	69.81	69.77	2.13	1.95	123.47	122.82	55.97	55.59	0.44	0.44	0.96	0.96	24.56	27.76	8.75	6.64	1.15	1.13	1.49	1.48	2.03	1.94	13.59	13.59
IMAS-26:D08WFACXX:1:250018590	4.16	4.16	1.31	1.18	67.13	66.93	5.27	5.9	104.93	101.53	42.32	40.33	0.42	0.41	0.88	0.81	16.99	18.53	11.1	12.48	1.1	1.06	2.11	2.28	2.58	2.58	13.16	12.72
IMAS-260:D08WFACXX:3:250018894	3.89	3.84	1.83	1.91	69.55	69.47	3.3	3.42	129.98	130.47	61.23	61.68	0.45	0.45	0.87	0.79	8.65	8.37	13.13	17.71	1.1	1.06	1.53	1.54	2.44	2.42	14.07	14.52
IMAS-261:D08WFACXX:3:250018895	3.85	3.8	2.09	2.25	66.81	66.6	1.89	1.65	132.57	133.13	67.5	68.58	0.49	0.5	0.95	0.94	4.3	3.06	7.02	2.7	1.07	1	1.4	1.36	2.42	2.4	13.66	13.74
IMAS-262:D08WFACXX:3:250018896	4.46	4.57	1.69	1.7	72.72	72.9	3.19	3.38	113.63	110.63	53.15	52.02	0.46	0.46	0.96	0.95	7.51	5.96	8.52	3.72	1.1	1.01	1.71	1.76	2.73	2.79	13.52	13.39
IMAS-263:D08WFACXX:3:250018897	4.1	4.09	1.98	2.12	70.72	70.74	1.93	1.69	129.39	129.65	60.53	60.9	0.46	0.46	0.88	0.81	6.47	5.7	10.58	11.08	1.18	1.19	1.7	1.74	2.55	2.55	14.04	14.51
IMAS-264:D08WFACXX:3:250018898	4.12	4.11	1.72	1.76	70.56	70.55	1.94	1.72	119.84	119.33	52.96	52.49	0.45	0.45	0.93	0.9	9.13	8.95	8.99	7.21	1.05	0.98	1.42	1.39	2.56	2.56	13.32	13.05
IMAS-265:D08WFACXX:3:250018899	4.13	4.13	1.64	1.63	75.07	75.32	1.41	1.04	124.44	123.86	56.9	56.78	0.45	0.44	1.03	1.09	15.17	16.32	9.46	8.38	1.06	1	1.53	1.53	2.56	2.56	13.73	13.88
IMAS-266:D08WFACXX:3:250018900	4.73	4.82	1.93	2.04	71.72	71.77	1.4	1.03	127.05	126.93	62.32	62.77	0.48	0.48	1.04	1.12	21.7	24.28	6.77	1.6	1.11	1.06	1.67	1.71	2.86	2.91	13.89	14.18
IMAS-267:D08WFACXX:3:250018901	4.54	4.59	1.86	1.93	73	73.17	1.66	1.38	116.29	115.17	55.83	55.86	0.47	0.47	0.9	0.84	8.05	7.62	8.87	6.98	1.11	1.07	1.53	1.53	2.77	2.79	13.49	13.42
IMAS-268:D08WFACXX:3:250018902	3.82	3.75	1.73	1.76	74.78	75	1.48	1.12	123.73	123.3	59.82	60.05	0.47	0.47	0.89	0.81	12.32	12.82	8.16	5.44	1.45	1.6	1.78	1.87	2.41	2.37	13.97	14.35
IMAS-269:D08WFACXX:3:250018903	3.53	3.31	2.18	2.56	71.2	71.25	1.57	0.84	127.4	127.38	58.07	58.06	0.44	0.44	0.99	1.04	28.9	35.73	9.33	7.31	1.13	1.08	1.55	1.56	2.26	2.15	13.69	13.92
IMAS-27:D08WFACXX:1:250018591	4.47	4.53	0.94	0.67	75.33	75.6	5.25	5.9	118.88	117.64	52.18	51.67	0.43	0.42	0.9	0.85	28.04	32.01	13.62	19	1.35	1.45	1.53	1.54	2.74	2.76	13.55	13.53
IMAS-270:D08WFACXX:3:250018904	4.55	4.75	1.55	1.49	74.13	74.6	3.08	3.25	139.4	142.46	63.49	64.63	0.45	0.45	0.87	0.63	2.53	-1.74	9.15	5.21	1.06	0.93	1.46	1.42	2.78	2.87	14.11	15.35
IMAS-271:D08WFACXX:3:250018905	2.85	2.52	2.17	2.42	68.88	68.75	2.24	2.01	135.4	136.55	65.14	66.09	0.47	0.48	0.93	0.88	15.02	16.36	11.91	16.23	1.14	1.1	1.25	1.14	1.93	1.76	14.2	15.03
IMAS-272:D08WFACXX:3:250018906	4.32	4.34	1.26	1.13	65.53	65.26	3.4	3.55	128.69	128.61	53.82	53.23	0.43	0.42	0.91	0.87	41.46	48.37	10.92	12.16	1.14	1.12	1.42	1.38	2.66	2.67	13.49	13.42
IMAS-273:D08WFACXX:3:250018907	3.01	2.62	1.69	1.71	66.51	66.09	1.94	1.55	109.57	105.09	49.38	47.46	0.45	0.45	1.06	1.25	17.45	21.36	9.48	7.55	1.29	1.42	1.49	1.47	2	1.81	13.43	13.15
IMAS-274:D08WFACXX:3:250018908	4.24	4.25	1.06	0.86	68.36	68.24	5.48	6.33	124.57	124.02	50.78	49.68	0.43	0.42	0.93	0.89	2.3	0.61	14.07	21.47	1.12	1.09	1.5	1.5	2.62	2.62	14.09	14.7
IMAS-275:D08WFACXX:3:250018909	3.92	3.88	2.61	3.01	71.55	71.61	2.05	1.83	118.75	117.75	51.12	50.34	0.43	0.42	0.89	0.83	2.4	0.74	9.48	8.43	1.06	0.98	1.62	1.64	2.46	2.44	14.41	15.23
IMAS-276:D08WFACXX:3:250018910	5.21	5.39	1.53	1.51	71.31	71.35	1.87	1.6	128.73	128.77	54.81	54.37	0.43	0.42	0.95	0.93	46.26	54.22	10.56	11.29	1.14	1.12	1.52	1.51	3.1	3.19	13.77	13.97
IMAS-277:D08WFACXX:3:250018911	3.01	2.81	1.35	1.25	69.48	69.43	2.35	2.22	129.56	129.81	49.36	48.41	0.41	0.4	0.94	0.92	17.13	18.71	13.25	17.95	1.08	1.02	1.64	1.66	2.01	1.9	13.57	13.58
IMAS-278:D08WFACXX:3:250018912	4.55	4.61	1.77	1.84	68.66	68.57	4.96	5.53	136.15	137.52	59.43	59.79	0.45	0.45	0.91	0.86	11.96	12.38	13.64	19.11	1.11	1.07	1.68	1.72	2.77	2.8	13.47	13.36
IMAS-279:D08WFACXX:3:250018913	4.66	4.75	2.32	2.56	68.49	68.35	1.82	1.55	148.11	151.13	72.55	74.25	0.46	0.47	0.97	0.97	3.64	2.26	11.23	13.48	1.1	1.05	2.38	2.63	2.83	2.87	13.23	12.88
IMAS-28:D08WFACXX:1:250018592	4.05	4.03	1.69	1.71	69.05	68.97	3.22	3.31	124.57	124.47	56.76	56.71	0.44	0.44	1.01	1.06	6.73	6.03	10.39	10.86	1.24	1.28	1.79	1.86	2.52	2.51	13.4	13.22
IMAS-280:D08WFACXX:3:250018914	2.85	2.62	2	2.14	67.09	66.9	4.31	4.72	149.15	152.25	72.07	73.71	0.46	0.47	0.92	0.88	2.74	1.16	10.28	10.42	1.06	1	1.4	1.37	1.92	1.81	13.77	13.95
IMAS-281:D08WFACXX:3:250018915	3.81	3.45	1.15	0.07	79.29	82.67	4.03	6.44	NA	NA	NA	NA	0.47	0.51	0.91	0.61	8.12	5.76	10.89	20.02	1.16	1.11	NA	NA	2.4	2.23	13.96	16.58
IMAS-282:D08WFACXX:3:250018916	3.11	2.77	1.07	0.67	74	74.35	5.38	6.6	124.05	123.03	55.92	55.45	0.45	0.46	0.78	0.44	4.07	0.63	14.82	29.69	1.06	0.92	1.23	1.12	2.06	1.89	13.4	13.11
IMAS-283:D08WFACXX:3:250018917	4.06	4.04	1.46	1.39	70.94	70.97	4.27	4.72	136.31	137.86	72.97	74.98	0.52	0.54	0.8	0.61	1.05	-1.43	10.26	10.9	1.21	1.23	1.59	1.61	2.53	2.52	13.93	14.34
IMAS-284:D08WFACXX:3:250018918	4.13	4.12	0.86	0.44	79.67	80.56	3.28	3.5	159.3	168.18	77.47	82.11	0.46	0.46	0.91	0.81	3.28	0.76	9.28	7.1	1.06	0.96	1.46	1.45	2.57	2.56	14.06	14.93
IMAS-285:D08WFACXX:3:250018919	3.59	3.5	1.89	1.98	71.09	71.11	3.16	3.26	130.78	131.14	56.7	56.52	0.43	0.43	0.98	1	31.68	36.46	10.37	10.82	1.08	1.01	1.24	1.15	2.3	2.25	13.88	14.16
IMAS-286:D08WFACXX:3:250018920	2.96	2.56	1.21	1	69.35	69.22	4.5	5.28	106.96	100.72	46.48	43.35	0.44	0.43	0.89	0.76	5.65	4	9.01	6.33	1.1	1.03	1.43	1.41	1.98	1.78	13.71	13.93
IMAS-287:D08WFACXX:3:250018921	3.49	3.31	1.51	1.43	67.47	67.16	4.98	6.01	122.17	120.91	52.86	51.53	0.44	0.43	0.9	0.81	8.33	7.71	10.99	13.34	1.13	1.07	NA	NA	2.24	2.16	13.36	12.97
IMAS-288:D08WFACXX:3:250018922	3.91	3.87	1.02	0.79	65.31	65.04	5.77	6.57	103.72	99.79	46.75	45.22	0.45	0.45	0.86	0.77	4.93	3.83	12.54	16.5	1.11	1.07	1.59	1.6	2.45	2.43	14.1	14.65
IMAS-289:D08WFACXX:4:250018954	3.51	3.39	1.54	1.51	65.79	65.52	3.81	4.09	108.06	105.62	49.22	48.31	0.44	0.43	1	1.05	22.86	25.68	10.4	10.76	1.12	1.08	1.45	1.41	2.25	2.2	13.47	13.35
IMAS-29:D08WFACXX:1:250018593	2.89	2.69	1.95	2.06	77.04	77.39	2.73	2.71	142.19	144.33	67.39	68.57	0.46	0.46	0.98	0.99	2.88	1.31	9.1	7.47	1.18	1.19	1.44	1.42	1.95	1.85	13.87	14.14
IMAS-290:D08WFACXX:4:250018955	2.72	2.47	2.31	2.58	64.48	64.13	3.56	3.75	118.09	116.75	47.8	46.54	0.43	0.43	1.27	1.55	25.72	29.19	8.79	6.74	1.29	1.34	1.23	1.12	1.86	1.74	12.89	12.19
IMAS-291:D08WFACXX:4:250018956	3.94	3.9	2.09	2.27	67.51	67.35	2.43	2.33	137.07	138.61	58.86	59.08	0.44	0.43	1.01	1.06	7.32	6.74	15.9	24.99	1.21	1.23	1.51	1.49	2.47	2.45	13.06	12.53
IMAS-292:D08WFACXX:4:250018992	3.94	3.91	2.34	2.64	72.96	73.08	1.61	1.29	130.45	130.62	61.87	62.26	0.46	0.47	1.04	1.11	3.72	2.33	8.31	5.47	1.12	1.08	2.16	2.36	2.47	2.45	13.51	13.45
IMAS-293:D08WFACXX:4:250018993	4	3.97	2.05	2.19	69	68.92	1.94	1.69	137.31	138.94	58.65	58.8	0.43	0.42	1.06	1.16	12.6	13.18	8.29	5.45	1.23	1.26	1.55	1.54	2.5	2.48	13.44	13.3
IMAS-294:D08WFACXX:4:250018957	4.26	4.34	2.17	2.77	68.4	67.99	2.74	2.68	135.31	138.73	61.54	62.96	0.44	0.43	0.94	0.87	9.17	8.54	9.26	5.61	1.17	1.16	1.36	1.24	2.63	2.67	13.31	12.38
IMAS-295:D08WFACXX:4:250018994	3.27	2.99	2.09	2.41	66.88	66.38	1.62	0.88	140.29	144.01	71.1	74.18	0.49	0.51	1.03	1.15	8.46	7.82	9.17	6.44	1.19	1.2	1.71	1.81	2.13	1.99	13.36	12.83
IMAS-296:D08WFACXX:4:250018958	3.89	3.81	1.85	1.99	64.54	63.96	5.15	6.23	131.4	131.75	57.28	56.96	0.44	0.44	1.01	1.1	5.03	2.12	9.49	7.77	1.42	1.71	1.59	1.6	2.44	2.4	13.31	12.86
IMAS-297:D08WFACXX:4:250018995	3.7	3.62	1.84	1.92	67.49	67.3	3.31	3.42	138.61	139.83	56.37	56.03	0.42	0.41	1	1.04	8.07	7.66	8.52	5.84	1.13	1.11	1.4	1.35	2.35	2.31	13.8	14.01
IMAS-298:D08WFACXX:4:250018959	5.01	5.16	1.39	1.3	71.89	71.98	3.97	4.3	130.45	130.86	58.66	58.69	0.44	0.44	0.92	0.88	5.69	4.75	11.28	12.97	1.11	1.07	1.58	1.59	3.01	3.08	13.18	12.77
IMAS-299:D08WFACXX:4:250018960	5.22	5.39	1.02	0.79	62.42	61.97	3.29	3.42	129.96	130.26	50.93	50.09	0.38	0.36	0.86	0.76	13.37	14.11	8	4.81	1.15	1.14	1.6	1.62	3.11	3.2	13.12	12.68
IMAS-3:D08WFACXX:1:250018575	3.45	3.33	1.11	0.89	71.66	71.71	4.84	5.39	120.86	119.9	55.98	55.78	0.46	0.47	0.9	0.85	3.69	2.32	8.79	6.7	1.26	1.31	1.32	1.25	2.22	2.17	13.23	12.88
IMAS-300:D08WFACXX:4:250018961	3.74	3.6	2	2.26	70.4	70.39	4.26	4.97	142.15	145.18	59.02	59.1	0.42	0.4	0.99	1.03	7.12	5.36	8.72	4.55	1.06	0.91	1.34	1.27	2.37	2.3	14.21	15.28
IMAS-301:D08WFACXX:4:250018962	3.95	3.91	1.39	1.29	74.01	74.21	4	4.3	143.21	145.18	57.51	57.29	0.43	0.42	1.02	1.07	10.7	10.87	14.6	21.45	1.1	1.05	1.45	1.4	2.48	2.45	14.26	14.94
IMAS-302:D08WFACXX:4:250018963	3.95	3.92	2.08	2.23	70.62	70.63	4.16	4.51	152.15	155.65	62.99	63.52	0.41	0.4	0.95	0.95	9.86	9.84	10.13	10.12	1.19	1.19	1.68	1.72	2.48	2.46	13.96	14.33
IMAS-303:D08WFACXX:4:250018964	3.42	3.3	2.26	2.5	68.73	68.64	3.98	4.29	140.67	142.45	62.25	62.74	0.45	0.45	0.92	0.88	24.23	27.35	11.32	13.33	1.13	1.09	1.55	1.53	2.21	2.15	13.6	13.65
IMAS-304:D08WFACXX:4:250018965	3.2	3.03	1.33	1.22	71.23	71.27	2.22	2.06	125.22	125.16	56.71	56.63	0.46	0.46	0.96	0.95	20.15	22.38	13.99	20.03	1.15	1.13	1.62	1.64	2.1	2.02	12.95	12.34
IMAS-305:D08WFACXX:4:250018996	3.19	2.99	1.2	1.05	70.14	70.1	5.22	5.95	143.41	146.33	59.59	59.83	0.42	0.41	0.88	0.79	2.32	0.64	9.88	9.39	1.08	1.02	1.18	1.08	2.09	2	13.81	14.04
IMAS-306:D08WFACXX:4:250018997	3.39	3.2	1.8	1.86	71.54	71.59	4.26	4.78	144.69	147.45	60.86	61.14	0.42	0.4	1.03	1.13	4.46	2.9	10.95	13	1.07	0.99	1.4	1.35	2.19	2.1	13.91	14.35
IMAS-307:D08WFACXX:4:250018998	3.74	3.62	1.3	1.14	68.33	68.15	6.98	8.53	141.58	144.13	56.84	56.79	0.41	0.39	0.84	0.68	25.44	29.64	14.22	24.03	1.17	1.15	1.77	1.85	2.37	2.31	13.18	12.63
IMAS-308:D08WFACXX:4:250018966	3.78	3.72	1.37	1.3	69.58	69.52	5.18	5.82	145.91	148.68	59.25	59.45	0.44	0.44	0.9	0.83	2.28	0.6	10.88	12.01	1.17	1.17	1.53	1.52	2.39	2.36	13.67	13.76
IMAS-309:D08WFACXX:4:250018967	4.76	4.87	2.21	2.43	69.16	69.08	2.01	1.79	132.45	132.93	64.45	65.22	0.48	0.49	0.96	0.96	19.05	21.02	9.59	8.74	1.12	1.09	1.67	1.71	2.88	2.93	12.62	11.65
IMAS-31:D08WFACXX:1:250018595	4.42	4.47	1.89	1.98	67.47	67.28	2.01	1.8	119.17	118.09	53.61	53.1	0.45	0.45	0.91	0.87	2.23	0.52	8.62	6.02	1.09	1.04	1.14	1.01	2.71	2.73	13.42	13.24
IMAS-310:D08WFACXX:4:250018968	4.42	4.46	1.95	2.06	69.01	68.93	2.94	2.98	122.54	122.25	56.56	56.61	0.44	0.44	0.98	1	1.82	0.02	9.48	8.28	1.16	1.16	1.68	1.73	2.71	2.73	13.64	13.68
IMAS-311:D08WFACXX:4:250018969	3.85	3.8	1.33	1.22	70.41	70.43	4.77	5.31	111.41	108.98	51.88	51.28	0.46	0.46	0.96	0.95	1.8	0	8.41	5.91	1.13	1.1	1.98	2.11	2.43	2.4	13.47	13.37
IMAS-312:D08WFACXX:4:250018970	3.47	3.35	2.88	3.36	70.35	70.35	3.02	3.06	144.36	146.71	63.84	64.5	0.45	0.45	1.09	1.21	15.11	16.24	8.22	5.36	1.29	1.36	1.97	2.09	2.23	2.17	13.06	12.55
IMAS-314:D08WFACXX:4:250018971	4.38	4.6	1.61	1.56	62.96	59.95	3.1	3.77	NA	NA	NA	NA	0.46	0.47	0.95	0.9	8.14	5.79	9.25	2.73	1.17	1.15	NA	NA	2.69	2.8	13.68	14.39
IMAS-315:D08WFACXX:4:250018972	3.47	3.37	2.22	2.44	64.41	64.07	4.23	4.6	114.79	112.9	55.1	54.81	0.47	0.48	1	1.04	14.64	15.65	7.62	3.62	1.26	1.31	1.61	1.62	2.24	2.18	13.02	12.47
IMAS-316:D08WFACXX:4:250018973	5.04	5.27	0.99	0.63	70.11	70.06	5.5	6.53	140.06	142.3	56.38	56.11	0.4	0.38	0.85	0.69	1.23	-2.04	13.37	21.29	1.16	1.15	2.07	2.22	3.02	3.14	13.6	13.61
IMAS-317:D08WFACXX:4:250018974	4.9	5.3	1.51	1.33	68.03	67.54	3.5	4.17	136.06	138.72	48.08	44.08	0.37	0.27	0.87	0.62	2.54	-1.73	9.5	7.22	1.19	1.21	1.57	1.57	2.95	3.15	13.65	13.87
IMAS-318:D08WFACXX:4:250018975	4.18	4.18	1.13	0.9	70.91	70.93	4.08	4.48	156.43	161.42	62.83	63.52	0.41	0.39	0.88	0.79	3.74	2	10.44	11.14	1.18	1.18	1.83	1.91	2.59	2.59	13.68	13.78
IMAS-32:D08WFACXX:1:250018596	4.21	4.23	1.52	1.44	66.41	66.14	3.21	3.33	112.67	109.97	45.76	43.96	0.41	0.4	1	1.05	1.92	-0.33	11.05	12.94	1.09	1.03	2.15	2.35	2.6	2.61	13.39	13.16
IMAS-320:D08WFACXX:4:250018977	2.89	2.67	1.79	1.86	67.51	67.34	6.12	7.02	106.92	103.91	50.14	49.13	0.47	0.47	0.95	0.94	10.76	10.93	9.2	7.78	1.18	1.18	1.52	1.52	1.95	1.84	13.13	12.66
IMAS-321:D08WFACXX:4:250018978	4.96	5.11	1.55	1.54	68.54	68.4	3.9	4.24	121.82	121.02	60.53	60.68	0.48	0.49	0.98	1.01	20.68	23.58	10.27	10.69	1.11	1.06	1.55	1.55	2.98	3.06	13.32	13.03
IMAS-322:D08WFACXX:4:250018979	4.32	4.33	1.91	2.03	74.29	74.47	1.05	0.58	133.87	134.94	54.97	54.66	0.42	0.41	1.03	1.1	26.89	30.59	9.34	8.14	1.18	1.18	1.43	1.4	2.66	2.67	13.76	13.94
IMAS-323:D08WFACXX:4:250018980	3.99	3.95	1.5	1.44	72.7	72.81	2.54	2.47	128.33	128.24	55.86	55.49	0.45	0.45	0.98	0.99	2.94	1.39	9.9	9.57	1.18	1.18	1.51	1.5	2.49	2.48	13.83	14.11
IMAS-324:D08WFACXX:4:250018981	3.91	3.87	1.33	1.18	73.26	73.41	4.42	4.88	120.22	119.08	61.22	61.61	0.48	0.5	0.73	0.51	13.07	13.75	10.26	10.5	1.2	1.22	2.33	2.58	2.45	2.43	13.72	13.87
IMAS-325:D08WFACXX:4:250018982	4.2	4.21	1.87	1.96	73.99	74.19	1.14	0.7	130.71	131.01	67.35	68.45	0.51	0.52	1.05	1.14	6.71	6	8.25	5.3	1.29	1.35	1.42	1.38	2.6	2.61	14.06	14.54
IMAS-326:D08WFACXX:4:250018983	4.21	4.22	1.92	2.02	74.25	74.46	1.19	0.76	122.37	121.48	64.19	64.9	0.49	0.5	1.06	1.16	5.75	4.82	10.11	9.95	1.15	1.13	1.8	1.88	2.61	2.61	13.53	13.51
IMAS-327:D08WFACXX:4:250018984	3.94	3.89	2.03	2.18	73.56	73.75	2.77	2.77	125.49	125.04	60.58	60.84	0.46	0.47	0.96	0.96	2.73	1.14	9.98	9.71	1.1	1.05	1.45	1.41	2.47	2.44	13.97	14.37
IMAS-328:D08WFACXX:4:250019000	4.06	4.04	1.57	1.54	73.27	73.4	2.01	1.79	120.69	119.4	59.29	59.21	0.49	0.5	0.94	0.92	3.13	1.62	9.28	7.89	1.06	0.99	1.79	1.87	2.53	2.52	13.35	13.13
IMAS-329:D08WFACXX:4:250018985	4.04	4	1.35	1.18	77.7	78.45	3.88	4.44	109.87	104.34	53.41	51.76	0.47	0.48	0.77	0.42	10.84	11.07	8.78	4.61	1.11	1.06	2.08	2.24	2.52	2.5	14.86	17.07
IMAS-33:D08WFACXX:1:250018597	3.55	3.43	2.25	2.48	68.5	68.4	4.21	4.59	113.69	111.6	46.37	44.93	0.43	0.42	0.94	0.91	12.01	12.46	9.37	8.28	1.32	1.41	1.38	1.34	2.27	2.22	13.65	13.73
IMAS-331:D08WFACXX:4:250018986	3.59	3.5	2.1	2.27	68.49	68.37	3.66	3.89	131.09	131.37	59.82	59.9	0.45	0.45	0.95	0.95	18.03	19.8	9.06	7.55	1.15	1.13	1.98	2.11	2.3	2.25	14.04	14.49
IMAS-332:D08WFACXX:4:250018987	3.2	3.03	1.54	1.51	74.42	74.63	1.71	1.41	143.88	145.92	77.29	79.53	0.51	0.54	0.94	0.92	4.58	3.4	9.87	9.42	1.26	1.31	1.58	1.58	2.1	2.02	14.59	15.56
IMAS-334:D08WFACXX:4:250018989	4.3	4.32	1.02	0.79	76.42	76.72	5.63	6.59	99.03	95.04	44.3	42.26	0.45	0.44	1.17	1.39	26.78	30.72	9.91	9.77	1.18	1.19	2.07	2.24	2.65	2.66	14.01	14.44
IMAS-335:D08WFACXX:4:250018990	3.8	3.73	1.25	1.11	69.65	69.62	3.83	4.09	118.81	117.81	56.86	56.83	0.47	0.48	0.93	0.9	10.99	11.2	9.48	8.5	1.08	1.02	1.89	1.99	2.4	2.37	13.72	13.84
IMAS-336:D08WFACXX:4:250018991	5.1	5.42	1.02	0.65	71.38	71.47	1.73	1.24	105.63	99.63	49.42	47.35	0.46	0.47	1	1.07	34	43.76	10.51	12.24	1.18	1.19	1.45	1.41	3.05	3.21	13.26	12.65
IMAS-337:D08WFACXX:4:250019002	3.89	3.84	2.41	2.73	72.09	72.17	2.61	2.55	140.15	142.1	68.8	70.2	0.48	0.48	1.01	1.05	10.28	10.35	9.16	7.63	1.12	1.09	1.65	1.67	2.44	2.42	13.3	13.01
IMAS-338:D08WFACXX:4:250019003	3.73	3.65	1.91	2.02	72.24	72.33	1.24	0.83	124.38	123.62	56.58	56.34	0.45	0.45	1.01	1.06	4.04	2.74	10.01	10.01	1.18	1.17	2.01	2.15	2.37	2.33	13.74	13.89
IMAS-339:D08WFACXX:4:250019004	3.87	3.83	2.09	2.26	73.12	73.27	3.03	3.08	133.18	133.91	55.69	55.38	0.43	0.43	0.99	1.01	3.73	2.36	12.2	15.7	1.07	1	1.2	1.09	2.44	2.41	13.68	13.78
IMAS-34:D08WFACXX:1:250018598	3.66	3.58	1.75	1.81	70.69	70.7	2.48	2.39	111.84	109.51	57.61	57.59	0.51	0.53	1.04	1.11	16.79	18.31	7.84	4.48	1.05	0.97	1.41	1.37	2.33	2.29	13.11	12.65
IMAS-340:D08WFACXX:4:250019005	4.63	4.7	1.57	1.52	70.14	70.13	3.63	3.85	131.71	131.96	62.43	62.92	0.47	0.48	0.91	0.86	8.5	8.17	13.68	19.16	1.12	1.09	2.01	2.15	2.81	2.85	13.48	13.4
IMAS-341:D08WFACXX:4:250019006	4.14	4.12	1.6	1.58	76.75	77.09	2.12	1.94	120.32	119.28	54.2	53.66	0.45	0.44	0.9	0.85	4.18	2.89	10.88	12.07	1.07	1.01	1.71	1.77	2.57	2.56	13.22	12.85
IMAS-342:D08WFACXX:4:250019007	3.83	3.77	1.84	1.95	66.78	66.58	4.58	5.03	114.11	112.02	47.09	45.67	0.42	0.42	1	1.03	7.93	7.49	9.99	9.76	1.25	1.29	2.11	2.27	2.41	2.38	14.1	14.64
IMAS-345:D08WFACXX:4:250019010	3.26	3.03	1.32	1.06	78.65	79.38	3.18	3.44	146.42	152.19	64.49	66.54	0.42	0.41	0.81	0.59	7.79	6.96	15.33	27.97	1.18	1.19	NA	NA	2.13	2.01	13.86	14.32
IMAS-346:D08WFACXX:4:250019011	3.9	3.86	2.28	2.51	67.35	67.16	2.75	2.72	163.14	168.12	88.31	91.99	0.51	0.53	0.95	0.95	1.77	-0.02	8.59	6.22	1.28	1.34	1.8	1.88	2.45	2.43	13.92	14.25
IMAS-347:D08WFACXX:4:250019012	2.99	2.79	1.28	1.12	76.09	76.39	5.19	5.96	155.12	159.06	69.47	71.3	0.44	0.44	1.01	1.06	3.95	2.28	8.81	6.48	1.09	1.03	1.39	1.35	1.99	1.89	13.92	14.26
IMAS-348:D08WFACXX:4:250019013	3.64	3.55	1.01	0.69	73.52	73.68	8.31	10.02	135.23	135.87	70.12	71.48	0.5	0.52	0.78	0.57	17.88	20.01	15.19	25.58	1.3	1.39	2.08	2.24	2.32	2.28	13.7	13.83
IMAS-35:D08WFACXX:1:250018599	4.56	4.77	1.35	1.14	66.05	65.46	4.7	5.91	115.38	111.67	50.88	48.84	0.44	0.42	0.97	0.97	2.52	-1.76	9.51	7.3	1.06	0.91	1.53	1.52	2.78	2.89	13.08	11.95
IMAS-350:D08WFACXX:4:250019015	3.4	3.15	1.12	0.83	80.74	81.73	4.37	5.11	144.61	148.89	75.29	79.38	0.48	0.49	0.99	1.03	17.74	20.53	11.87	17.78	1.18	1.19	2.08	2.25	2.2	2.07	14.13	15.12
IMAS-351:D08WFACXX:4:250019016	3.36	3.23	1.39	1.31	76.69	77.02	4.95	5.52	168.21	174.45	82.96	86.26	0.49	0.5	0.94	0.91	5.82	4.9	12.21	15.43	1.3	1.38	1.58	1.62	2.18	2.11	14.2	14.8
IMAS-354:D08WFACXX:4:250019019	3.35	3.2	1.27	1.13	75.2	75.45	4.66	5.17	127.43	127.54	68.38	69.85	0.51	0.54	0.77	0.59	6.42	5.63	10.23	10.57	1.15	1.14	1.37	1.33	2.17	2.1	13.22	12.9
IMAS-36:D08WFACXX:1:250018600	3.45	3.21	1.48	1.35	65.28	64.76	1.13	0.35	131.17	131.66	55.93	55.39	0.44	0.43	0.99	1.03	2.6	-1.64	7.91	1.4	1.18	1.19	1.53	1.53	2.22	2.11	13.34	12.93
IMAS-361:D08WFACXX:4:250019026	3.14	2.97	1.45	1.39	79.17	79.63	3.63	3.86	147.31	149.88	78.74	81.13	0.51	0.53	0.95	0.93	13.78	14.61	8.72	6.6	1.09	1.04	1.36	1.3	2.07	1.98	14.47	15.36
IMAS-362:D08WFACXX:4:250019027	4.28	4.29	2.04	2.2	71.87	71.94	3.64	3.87	140.56	142.42	78.36	80.85	0.54	0.56	0.91	0.86	9.7	9.64	14.67	21.64	1.14	1.12	1.7	1.74	2.64	2.65	13.92	14.26
IMAS-363:D08WFACXX:4:250019028	2.93	2.73	1.99	2.12	68.24	68.11	3.94	4.23	134.18	135	63.79	64.35	0.45	0.45	0.92	0.88	6.74	6.04	8.32	5.48	1.17	1.16	1.8	1.87	1.97	1.86	13.5	13.41
IMAS-364:D08WFACXX:4:250019029	4.43	4.47	0.89	0.6	78.89	79.35	4.54	5	147.96	150.8	90.69	94.71	0.55	0.58	0.92	0.88	12.02	12.49	11.64	14.05	1.12	1.09	1.45	1.44	2.71	2.73	13.76	13.92
IMAS-365:D08WFACXX:4:250019030	3.36	3.23	2.07	2.24	75.73	76.02	4.27	4.67	156.33	160.34	73.79	75.57	0.46	0.46	0.87	0.79	18.71	20.64	11.14	12.85	1.2	1.22	1.59	1.6	2.18	2.12	14.45	15.31
IMAS-368:D08WFACXX:4:250019033	3.63	3.54	1.3	1.17	73.4	73.56	5.52	6.23	153.97	157.43	75.81	77.83	0.47	0.48	0.87	0.78	5.45	4.46	13.03	17.58	1.17	1.16	1.71	1.75	2.31	2.27	13.72	13.84
IMAS-369:D08WFACXX:4:250019034	4.47	4.53	1.45	1.38	69.09	68.97	2.9	2.92	124.78	123.79	56.43	55.98	0.45	0.45	0.95	0.95	6.05	5.22	9.71	9	1.17	1.17	1.7	1.75	2.73	2.77	13.63	13.67
IMAS-37:D08WFACXX:1:250018601	4.06	4.05	1.55	1.51	73.78	73.97	1.41	1.02	109.34	106.64	57.16	56.93	0.5	0.52	1.02	1.07	7.1	6.48	8.43	5.75	1.09	1.04	1.8	1.88	2.53	2.52	13.68	13.78
IMAS-370:D08WFACXX:4:250019035	3.75	3.69	1.79	1.85	74.48	74.68	2.67	2.63	144.82	147.24	76.73	79.05	0.49	0.51	0.94	0.91	32.73	37.73	12.86	17.29	1.22	1.24	1.78	1.85	2.38	2.35	14.64	15.65
IMAS-371:D08WFACXX:4:250019036	4.46	4.53	1.83	1.93	69.2	69.1	3.67	3.97	153.24	158.34	80.94	84.67	0.5	0.51	0.93	0.89	26.16	29.94	9.75	9.24	1.19	1.21	1.68	1.72	2.73	2.77	13.37	13.13
IMAS-373:D08WFACXX:4:250019038	3.6	3.5	2.09	2.28	74.76	74.99	3.19	3.29	146.87	149.55	79.38	82.1	0.52	0.54	1.06	1.15	4.75	3.61	8.49	6	1.19	1.19	1.95	2.08	2.3	2.25	14.24	14.88
IMAS-374:D08WFACXX:4:250019039	3.08	2.87	1.87	1.98	72.68	72.81	4.34	4.82	154.66	158.5	85.23	88.65	0.53	0.56	1.06	1.17	4.24	2.62	9.02	7.17	1.11	1.07	1.5	1.49	2.04	1.93	13.9	14.26
IMAS-376:D08WFACXX:4:250019041	3.21	3.05	1.04	0.82	75.94	76.21	3.51	3.71	150.55	153.7	78.64	81.09	0.5	0.51	0.84	0.71	3.78	2.32	14.18	20.57	1.15	1.14	1.39	1.35	2.11	2.02	14.52	15.44
IMAS-378:D08WFACXX:4:250019043	3.88	3.82	0.92	0.66	72.52	72.63	2.76	2.75	113.8	111.6	51.44	50.57	0.43	0.43	0.85	0.73	29.65	33.98	14.79	22.39	1.15	1.13	1.43	1.39	2.44	2.41	13	12.4
IMAS-379:D08WFACXX:4:250019044	4.85	4.97	1.51	1.46	61.73	61.25	1.38	1	112.11	110	47.03	45.78	0.42	0.41	0.94	0.92	4.71	3.55	8.61	6.18	1.26	1.3	1.72	1.78	2.93	2.99	13.72	13.85
IMAS-38:D08WFACXX:1:250018602	4.48	4.54	1.19	1.01	63.13	62.73	4.4	4.83	105.55	102.44	41.12	39.05	0.41	0.4	0.93	0.89	3.13	1.64	9.12	7.65	1.18	1.18	1.44	1.4	2.74	2.77	13.16	12.73
IMAS-380:D08WFACXX:4:250019045	2.99	2.79	1.6	1.59	75.48	75.75	5.64	6.4	135.13	135.95	72.57	74.16	0.51	0.53	0.86	0.78	24.26	27.41	14.22	20.46	1.11	1.08	1.44	1.4	1.99	1.9	13.34	13.12
IMAS-381:D08WFACXX:4:250019046	3.84	3.74	1.44	1.3	75.5	75.98	5.85	7.32	140.63	144.55	66.8	69.07	0.47	0.47	0.92	0.85	17.83	20.67	9.28	7.59	1.17	1.15	NA	NA	2.42	2.37	13.4	13.12
IMAS-382:D08WFACXX:4:250019047	3.48	3.3	2.2	2.67	70.37	70.38	2.35	2.17	122.17	120.62	55.57	54.78	0.45	0.45	0.98	1	11.6	12.16	10.08	10.22	1.21	1.25	NA	NA	2.24	2.15	13.69	13.87
IMAS-383:D08WFACXX:4:250019048	3.05	2.68	1.95	2.18	78.19	78.92	6.46	8.74	198.16	213.1	107.41	116.49	0.5	0.53	0.84	0.51	9.31	8.76	9.95	9.92	1.19	1.21	1.97	2.1	2.03	1.84	13.74	14.1
IMAS-387:D08WFACXX:5:250019083	3.57	3.46	1.75	1.83	65.09	64.78	5.9	6.74	143.86	146.11	59.26	59.38	0.41	0.4	0.95	0.93	6.45	5.68	9.66	8.89	1.05	0.98	1.47	1.45	2.28	2.23	13.43	13.27
IMAS-388:D08WFACXX:5:250019119	3.46	3.34	2.1	2.28	69.08	69	5.12	5.74	134.56	135.22	67.37	68.38	0.48	0.49	1.03	1.09	3.04	1.52	8.74	6.58	1.16	1.16	1.41	1.37	2.23	2.17	14.08	14.57
IMAS-39:D08WFACXX:1:250018603	3.34	3.2	1.79	1.85	70.25	70.21	0.96	0.46	130.2	130.47	65.4	66.2	0.48	0.49	0.9	0.84	5.14	4.1	12.04	15.13	1.16	1.15	2.33	2.59	2.17	2.1	13.45	13.3
IMAS-390:D08WFACXX:5:250019084	3.58	3.47	1.25	1.11	73.81	73.99	4.06	4.39	134.07	134.38	59.48	59.46	0.45	0.45	0.87	0.79	8.33	7.97	17.02	27.72	1.08	1.03	1.44	1.41	2.29	2.23	13.52	13.47
IMAS-391:D08WFACXX:5:250019121	3.16	2.98	1	0.76	76.77	77.12	2.66	2.61	121.29	120.47	60.68	61.17	0.49	0.5	1	1.05	32.87	37.89	12.03	15.05	1.33	1.43	1.73	1.78	2.08	1.99	12.78	11.99
IMAS-392:D08WFACXX:5:250019085	3.57	3.41	1.83	1.99	75.97	76.5	5.7	7.08	126.78	126.45	63.28	64.53	0.49	0.51	0.92	0.85	14.87	16.64	9.33	7.84	1.18	1.19	NA	NA	2.29	2.21	13.88	14.39
IMAS-393:D08WFACXX:5:250019122	3.3	3.15	1.72	1.75	74.6	74.84	3.42	3.58	150.67	153.73	80.01	82.61	0.5	0.51	1.05	1.13	1.76	-0.05	7.83	4.28	1.19	1.2	1.84	1.96	2.15	2.07	13.72	13.87
IMAS-394:D08WFACXX:5:250019086	3.93	3.87	1.92	2.15	64.79	64.21	6.62	8.43	134.91	137.15	62.4	63.36	0.45	0.44	0.93	0.88	9.71	9.57	12.01	16.65	1.25	1.34	NA	NA	2.46	2.44	13.86	14.34
IMAS-395:D08WFACXX:5:250019087	4.36	4.39	2.09	2.25	67.28	67.11	1.95	1.74	135.77	137.05	52.87	52.42	0.41	0.4	0.93	0.9	40.47	47.17	11.45	13.52	1.14	1.12	1.73	1.78	2.68	2.69	13.52	13.46
IMAS-396:D08WFACXX:5:250019088	4.05	4.03	2.16	2.36	68.52	68.41	3.48	3.67	129.11	129.34	59.2	59.28	0.44	0.43	0.95	0.93	2.89	1.34	9.67	9.06	1.16	1.16	1.54	1.54	2.53	2.52	13.92	14.23
IMAS-397:D08WFACXX:5:250019089	4.29	4.3	1.72	1.73	72.16	72.27	8.12	9.55	171.37	177.78	90.67	94.74	0.51	0.53	0.82	0.69	22.88	25.71	16.83	27.53	1.07	1	1.84	1.93	2.65	2.65	14.07	14.55
IMAS-398:D08WFACXX:5:250019090	5.02	5.16	1.98	2.12	66.24	66.01	3.62	3.84	148.51	151.64	81.56	84.56	0.52	0.54	0.92	0.88	5.56	4.58	8.07	4.85	1.04	0.96	1.54	1.53	3.01	3.08	13.79	13.99
IMAS-399:D08WFACXX:5:250019091	3.53	2.87	NA	NA	68.24	67.34	6.3	12.93	148.92	167.52	69.81	78.45	0.45	0.46	0.91	0.41	NA	NA	15.04	86.33	NA	NA	NA	NA	2.26	1.93	13.37	10.94
IMAS-4:D08WFACXX:1:250018611	3.79	3.72	1.74	1.77	70.43	70.42	2.62	2.56	121.86	120.96	54.62	54.18	0.44	0.44	0.95	0.94	11.38	11.69	10.37	10.92	1.56	1.79	1.53	1.52	2.39	2.36	12.98	12.37
IMAS-40:D08WFACXX:1:250018619	5.23	5.4	1.17	1.02	71.78	71.84	2.63	2.59	105.85	102.79	44.63	43.01	0.44	0.44	0.95	0.94	3.1	1.58	11.99	14.93	1.12	1.08	1.41	1.36	3.11	3.2	13.5	13.41
IMAS-401:D08WFACXX:5:250019123	3.54	3.41	2.18	2.35	72.08	72.17	2.54	2.47	118.55	117.24	64.18	64.98	0.51	0.53	1.13	1.29	5.75	4.83	7.12	2.54	1.32	1.41	1.65	1.68	2.27	2.21	13.42	13.27
IMAS-403:D08WFACXX:5:250019125	4.14	4.15	1.7	1.73	75.38	75.63	2.41	2.29	181.24	188.74	95.6	100.11	0.5	0.52	0.94	0.92	19.22	21.24	11.14	12.83	1.15	1.13	1.6	1.61	2.57	2.58	13.34	13.08
IMAS-404:D08WFACXX:5:250019093	4.03	4	1.84	1.89	65.93	65.62	1	0.42	126.63	126.49	48.43	46.97	0.4	0.38	0.94	0.92	2.32	0.64	7.87	3.69	1.19	1.2	1.6	1.61	2.51	2.5	13.71	13.83
IMAS-405:D08WFACXX:5:250019094	3.44	3.29	2.2	2.47	69.89	69.85	3.03	3.1	118.72	117.5	56.13	55.92	0.47	0.48	0.99	1.01	1.59	-0.76	10.06	9.92	1.08	1.01	1.44	1.4	2.22	2.14	14.13	14.76
IMAS-408:D08WFACXX:5:250019097	3.23	2.91	1.64	1.64	69.65	69.56	2.68	2.59	120.15	117.49	49.86	47.57	0.43	0.41	1	1.07	3.14	0.58	8.82	5.3	1.23	1.28	1.42	1.37	2.12	1.95	14.27	15.48
IMAS-409:D08WFACXX:5:250019126	4.23	4.24	1.93	2.03	66.58	66.35	4.21	4.57	146.73	149.23	66.82	67.69	0.45	0.45	0.92	0.88	2.89	1.32	8.89	7	1.13	1.1	1.63	1.65	2.61	2.62	13.54	13.49
IMAS-41:D08WFACXX:1:250018604	2.84	2.6	1.6	1.59	74.26	74.46	1.96	1.74	145.29	148.38	67.06	68.36	0.45	0.45	0.92	0.88	1.87	0.09	9.52	8.62	1.1	1.05	1.16	1.03	1.92	1.8	14.11	14.62
IMAS-410:D08WFACXX:5:250019098	4.81	4.92	2.17	2.39	68.16	68.01	2.5	2.41	141.09	143.16	74.7	76.93	0.5	0.52	1.08	1.2	6.78	6.08	7.53	3.46	1.35	1.45	1.5	1.47	2.91	2.96	13.01	12.44
IMAS-411:D08WFACXX:5:250019099	3.74	3.58	1.94	2.14	68.72	68.53	2.57	2.45	127.89	127.24	55.88	55.15	0.44	0.43	1.02	1.12	11.25	11.75	8.88	5.34	1.09	0.98	1.51	1.48	2.37	2.29	13.52	13.39
IMAS-412:D08WFACXX:5:250019100	3.73	3.66	2.03	2.17	72.5	72.62	2.57	2.51	126.28	126.15	63.92	64.6	0.49	0.5	0.93	0.89	4.33	3.08	8.64	6.5	1.43	1.58	1.7	1.76	2.36	2.33	14.13	14.68
IMAS-413:D08WFACXX:5:250019101	4.76	4.86	1.79	1.85	66.98	66.78	4.36	4.78	122.12	121.71	59.42	59.91	0.46	0.47	0.96	0.95	9.92	9.92	8.44	6.04	1.25	1.29	1.5	1.5	2.88	2.93	13.48	13.38
IMAS-415:D08WFACXX:5:250019103	3.98	3.95	1.24	1.11	73.58	73.75	6.62	7.64	146.96	149.91	76.2	78.53	0.49	0.51	0.86	0.77	8.4	8.04	14.03	20.14	1.1	1.05	1.85	1.94	2.49	2.48	14.23	14.88
IMAS-416:D08WFACXX:5:250019104	3.18	3.02	1.92	2.02	74.82	75.06	2.19	2.04	118.11	116.52	60.97	61.3	0.51	0.53	1.02	1.07	39.18	45.57	8.88	7.37	1.18	1.18	1.41	1.37	2.09	2.01	13.24	12.91
IMAS-418:D08WFACXX:5:250019106	4.12	4.11	2.81	3.28	71.77	71.85	1.59	1.27	144.63	147.47	74.19	76.42	0.49	0.5	1.06	1.16	10.34	10.41	7.59	3.59	1.22	1.25	1.89	2	2.56	2.55	13.69	13.8
IMAS-419:D08WFACXX:5:250019107	3.84	3.79	1.16	0.97	74.17	74.34	1.47	1.1	116.11	114.07	49.71	48.42	0.44	0.44	0.91	0.86	5.43	4.43	9.06	7.36	1.15	1.13	1.36	1.29	2.42	2.39	13.92	14.25
IMAS-42:D08WFACXX:1:250018620	4.71	4.8	1.35	1.22	61.99	61.53	3.61	3.82	108.82	105.93	44.51	42.82	0.42	0.41	0.93	0.91	2.65	1.03	9.86	9.48	1.15	1.13	1.39	1.32	2.85	2.9	13.28	13
IMAS-420:D08WFACXX:5:250019108	4.02	4	1.73	1.75	70.24	70.22	2.76	2.75	127.04	126.66	60.07	60.17	0.47	0.47	0.92	0.88	4.67	3.5	8.02	4.73	1.22	1.26	1.35	1.28	2.51	2.5	13.75	13.93
IMAS-421:D08WFACXX:5:250019109	4.19	4.2	1.96	2.08	72.7	72.81	3.14	3.25	124.62	124.28	58.85	58.98	0.48	0.48	0.95	0.94	16.11	17.45	7.81	4.27	1.15	1.13	1.57	1.6	2.6	2.6	13.28	12.99
IMAS-422:D08WFACXX:5:250019110	4.19	4.2	1.88	2.05	70.72	70.75	2.13	1.73	125.45	124.6	57.06	56.7	0.45	0.46	1.06	1.32	7.81	6.47	9.61	8.42	1.05	0.9	1.34	1.27	2.6	2.6	14.05	15.14
IMAS-423:D08WFACXX:5:250019111	4.29	4.31	1.36	1.26	74.65	74.87	3.89	4.16	129.46	129.44	64.01	64.61	0.47	0.48	0.94	0.92	2.19	0.5	9.32	7.86	1.09	1.04	1.44	1.39	2.65	2.66	13.7	13.8
IMAS-425:D08WFACXX:5:250019112	3.75	3.67	1.54	1.51	71.78	71.84	-0.18	-0.97	127.44	127.35	63.5	63.98	0.49	0.5	1	1.03	5.65	4.72	16.1	25.78	1.12	1.09	1.44	1.41	2.38	2.34	13.61	13.62
IMAS-426:D08WFACXX:5:250019128	4.68	4.76	1.12	0.91	73.58	73.73	4.48	4.94	123.63	122.94	53.63	52.98	0.44	0.43	0.91	0.86	4.29	3.04	9.28	8.33	1.16	1.16	1.51	1.51	2.84	2.88	13.54	13.5
IMAS-427:D08WFACXX:5:250019113	5.59	5.84	2.29	2.53	65.95	65.71	2.95	2.98	144.77	147.13	73.05	74.81	0.47	0.47	1	1.04	18.29	20.12	9.3	8.18	1.2	1.21	1.9	2	3.29	3.42	13.28	12.98
IMAS-428:D08WFACXX:5:250019114	3.52	3.4	2.32	2.59	76.21	76.5	-0.02	-0.79	130.79	131.26	70.2	71.57	0.51	0.53	0.96	0.96	4.79	3.66	7.57	3.56	1.09	1.04	1.52	1.51	2.26	2.2	14.45	15.3
IMAS-429:D08WFACXX:5:250019115	4.83	5.06	1.36	1.2	67.05	66.69	5.66	7.01	123.78	122.36	54.65	53.79	0.45	0.44	0.94	0.9	3.28	0.75	9.02	6.01	1.24	1.29	1.56	1.57	2.91	3.03	13.19	12.51
IMAS-43:D08WFACXX:1:250018605	3.77	3.71	1.88	1.98	74.69	74.93	3.14	3.23	120.02	119.18	58.51	58.71	0.47	0.47	1.07	1.18	10.96	11.17	10.07	10.05	1.18	1.19	1.3	1.24	2.39	2.35	14.02	14.48
IMAS-430:D08WFACXX:5:250019116	6.48	6.88	1.61	1.6	70.83	70.84	-0.36	-1.21	146.73	149.52	67.59	68.64	0.45	0.45	0.87	0.78	7.1	6.46	10.14	10.32	1.06	1	1.5	1.48	3.74	3.94	13.96	14.32
IMAS-44:D08WFACXX:1:250018606	4.11	4.1	1.55	1.51	72.88	73.01	1.74	1.46	123.04	122.4	56.56	56.41	0.45	0.45	1.02	1.08	4.37	3.15	7.89	4.3	1.25	1.29	1.5	1.49	2.55	2.55	12.95	12.34
IMAS-45:D08WFACXX:1:250018607	3.1	2.91	1.86	1.95	73.01	73.13	3.06	3.12	130.25	130.34	57.42	57.18	0.44	0.44	0.94	0.91	2.52	0.88	9.06	7.36	1.12	1.08	1.45	1.41	2.05	1.95	13.88	14.18
IMAS-47:D08WFACXX:1:250018609	4.92	5.05	1.32	1.2	67.11	66.92	1.32	0.91	139.71	141.4	60.45	60.82	0.44	0.43	1.09	1.21	5.84	4.94	8.69	6.48	1.1	1.05	1.32	1.24	2.96	3.03	13.3	13
IMAS-48:D08WFACXX:1:250018610	6.86	7.32	1.04	0.81	62.5	62.06	2.86	2.85	111.75	109.17	53.36	52.6	0.46	0.46	0.98	1	6.68	5.97	7.85	4.35	1.12	1.08	1.39	1.34	3.93	4.16	13.51	13.43
IMAS-49:D08WFACXX:1:250018621	3.67	3.58	1.71	1.73	74.67	74.89	1.47	1.12	120.11	118.73	59.33	59.36	0.47	0.48	0.99	1.02	2.78	1.19	11.12	12.96	1.28	1.34	1.18	1.08	2.34	2.29	13.17	12.72
IMAS-5:D08WFACXX:1:250018612	3.66	3.57	1.67	1.68	64.97	64.65	3.7	3.93	138.84	140.18	52	51.13	0.38	0.36	0.9	0.83	2.47	0.82	7.94	4.54	1.19	1.19	1.51	1.5	2.33	2.28	13.19	12.79
IMAS-50:D08WFACXX:1:250018622	6.04	6.36	1.32	1.19	70.96	70.98	2.72	2.68	118.69	117.36	56.52	56.22	0.48	0.49	0.85	0.75	9.64	9.56	9.46	8.53	1.1	1.06	1.38	1.34	3.52	3.68	13.67	13.75
IMAS-51:D08WFACXX:1:250018623	3.85	3.8	1.16	0.97	72.52	72.63	1.98	1.77	125.8	125.67	56.75	56.55	0.45	0.44	0.9	0.85	33.26	38.36	16.58	26.75	1.31	1.39	1.41	1.37	2.43	2.4	13.2	12.82
IMAS-52:D08WFACXX:1:250018624	3.97	3.93	1.59	1.57	69.8	69.74	3.12	3.21	130.98	131.33	62.57	63.01	0.47	0.47	1.04	1.11	7.69	7.2	9.12	7.79	1.1	1.05	1.52	1.51	2.48	2.47	13.65	13.74
IMAS-53:D08WFACXX:1:250018625	5.07	5.23	1.78	1.82	69.92	69.89	4.05	4.37	146.75	149.3	59.99	60.24	0.41	0.39	0.96	0.95	4.78	3.65	11.22	12.85	1.08	1.02	2.27	2.5	3.04	3.11	13.68	13.79
IMAS-54:D08WFACXX:1:250018626	4.74	4.86	1.63	1.65	63.32	62.84	2.06	1.82	135.91	137.34	52.36	51.46	0.42	0.41	0.97	0.98	2.32	0.63	8.79	6.39	1.1	1.06	1.9	2	2.87	2.93	13.19	12.74
IMAS-55:D08WFACXX:1:250018627	5.69	5.94	1.51	1.47	64.06	63.71	2.94	2.99	136.71	138.07	57.96	58.01	0.41	0.4	0.98	1	1.84	0.05	7.19	2.58	1.12	1.08	1.87	1.97	3.34	3.47	13.8	14.01
IMAS-57:D08WFACXX:1:250018629	5.22	5.41	1.21	1.04	75.51	75.78	1.93	1.67	111.87	109.78	48.66	47.58	0.45	0.45	0.88	0.8	36.42	42.23	8.64	6.45	1.09	1.05	1.13	1.01	3.11	3.21	14.3	15.01
IMAS-58:D08WFACXX:1:250018630	3.78	3.67	1.75	1.8	77.79	78.46	2.48	2.34	110.39	106.13	50.56	48.82	0.48	0.5	0.9	0.76	12.31	13.4	8.32	1.58	1.17	1.17	1.61	1.62	2.39	2.34	13.4	13.03
IMAS-59:D08WFACXX:1:250018631	3.95	3.92	1.44	1.38	77.91	78.31	-0.69	-1.64	119.97	118.68	60.51	60.64	0.49	0.5	0.93	0.89	2.38	0.72	11.29	13.3	1.08	1.03	1.32	1.25	2.48	2.46	14.24	14.95
IMAS-6:D08WFACXX:1:250018576	3.35	3.21	2	2.16	72.21	72.3	2.9	2.94	130.13	130.57	60.19	60.57	0.45	0.46	0.89	0.82	11.6	11.97	11.79	14.7	1.16	1.15	1.38	1.33	2.18	2.11	13.72	13.87
IMAS-60:D08WFACXX:1:250018632	4.18	4.2	1.5	1.42	74.22	74.66	1.14	0.12	115.6	112.07	48.88	46.47	0.43	0.41	1.04	1.24	6.05	3.71	9.37	6.33	1.21	1.25	1.42	1.37	2.59	2.6	13.3	12.68
IMAS-61:D08WFACXX:1:250018633	4.2	4.23	1.64	1.64	71.05	71.1	3.49	3.92	136.37	138.56	59.65	59.81	0.44	0.42	0.97	0.98	17.27	21.12	9.47	7.14	1.12	1.07	1.79	1.87	2.6	2.61	13.3	12.62
IMAS-62:D08WFACXX:1:250018634	3.89	3.79	1.45	1.36	79.65	80.51	2.37	2.15	137.68	140.07	63.06	64	0.46	0.46	0.97	0.99	3.95	1.66	9.31	7.07	1.1	1.03	1.19	1.08	2.44	2.4	13.77	14.09
IMAS-63:D08WFACXX:1:250018635	4.64	4.72	1.67	1.7	70.38	70.35	1.84	1.57	141.09	142.95	62.56	62.96	0.44	0.43	1.06	1.15	3.36	1.92	8.05	4.81	1.15	1.14	1.67	1.71	2.82	2.86	14.06	14.51
IMAS-64:D08WFACXX:1:250018636	3.58	3.38	1.81	1.87	71.85	71.94	0.46	-0.63	132.77	134.35	67.82	70.02	0.5	0.52	1.03	1.16	15.57	17.53	9.25	6.96	1.07	0.98	1.41	1.38	2.29	2.19	13.57	13.59
IMAS-65:D08WFACXX:1:250018637	3.77	3.64	1.98	2.2	72.98	73.21	0.94	0.08	139.68	141.88	71.41	73.67	0.49	0.51	1.06	1.23	55.19	79.79	9.82	9.47	1.1	1	1.49	1.48	2.38	2.32	13.35	12.95
IMAS-66:D08WFACXX:1:250018638	4.94	5.35	1.73	1.81	78.15	79.11	3.35	3.69	116.26	112.95	55.91	55.33	0.49	0.52	0.95	0.91	2.6	-1.65	11.5	18.58	1.1	1.02	1.5	1.5	2.97	3.17	13.46	13.18
IMAS-67:D08WFACXX:1:250018639	4.69	4.97	1.06	0.65	75.21	75.79	2.77	2.74	105.53	98.63	50.43	48.35	0.48	0.5	0.96	0.94	2.51	-1.73	12.51	24.29	1.11	1.05	1.46	1.45	2.84	2.98	13.26	12.5
IMAS-68:D08WFACXX:1:250018640	3.68	3.49	1.21	0.67	74.56	74.92	3.19	3.39	124.13	122.98	59.71	60.15	0.47	0.49	0.94	0.86	3.66	-1.79	18.56	66.82	1.13	1.07	1.45	1.42	2.34	2.24	13.23	12.61
IMAS-69:D08WFACXX:1:250018641	5.51	5.96	1.11	0.75	67.44	67.13	4.11	4.74	134.57	136	59.02	59.1	0.43	0.42	0.93	0.88	2.52	-1.77	9.98	9.95	1.12	1.06	1.89	2.03	3.26	3.48	13.05	12.11
IMAS-7:D08WFACXX:1:250018613	3.24	3.09	1.89	1.96	71.72	71.79	3.06	3.12	128.7	128.62	56.46	56.15	0.43	0.42	0.9	0.84	23.94	27.01	9.56	8.61	1.12	1.09	1.34	1.28	2.12	2.05	13.6	13.61
IMAS-70:D08WFACXX:1:250018642	2.93	2.72	2.3	2.54	72.07	72.16	1.81	1.55	138.65	140	58.95	58.97	0.43	0.43	1	1.03	14.69	15.75	8.58	6.23	1.24	1.29	1.63	1.65	1.97	1.86	13.68	13.77
IMAS-71:D08WFACXX:1:250018643	3.71	3.59	1.23	0.87	70.32	70.3	1.78	1.33	130.46	131.55	55.4	54.84	0.44	0.43	0.93	0.89	4.42	2.37	8.07	3.75	1.14	1.09	NA	NA	2.35	2.29	13.24	12.65
IMAS-72:D08WFACXX:1:250018644	3.77	3.65	2.23	2.65	71.04	71.08	2.57	2.47	134.24	135.53	67.17	68.83	0.49	0.52	0.93	0.87	4.51	1.34	11.45	16.27	1.12	1.07	1.33	1.26	2.38	2.32	13.91	14.47
IMAS-73:D08WFACXX:1:250018645	5.39	6.02	1.38	1.2	64.66	63.91	1.92	1.39	111.77	106.68	43.79	40.01	0.39	0.35	0.97	0.99	11.04	11.41	9.28	6.39	1.19	1.2	1.54	1.54	3.2	3.51	13.19	12.25
IMAS-74:D08WFACXX:1:250018646	5.01	5.29	1.52	1.43	71.68	71.78	2.92	2.98	123.06	121.83	54.34	53.52	0.44	0.43	0.97	0.99	19.86	25.08	8.22	3	1.1	1.02	1.71	1.75	3	3.15	13.83	14.24
IMAS-75:D08WFACXX:1:250018647	4.33	4.43	1.99	2.21	73.63	74.03	1.43	0.58	123.02	122.17	61.48	62.57	0.49	0.51	0.96	0.93	5.52	2.86	10.66	13.81	1.05	0.91	1.55	1.56	2.67	2.71	14.3	15.98
IMAS-76:D08WFACXX:1:250018648	3.81	3.71	1.64	1.62	68.82	68.65	1.72	1.23	122.49	121.03	51.3	49.88	0.42	0.41	1	1.07	19.97	25.25	9.39	7.78	1.13	1.08	1.37	1.3	2.4	2.36	13.64	13.73
IMAS-77:D08WFACXX:1:250018649	4.21	4.21	1.79	1.84	69.54	69.47	2.76	2.73	117.92	116.22	45.34	43.62	0.41	0.4	0.95	0.93	5.76	4.69	9.16	7.76	1.41	1.57	1.43	1.4	2.6	2.61	13.64	13.67
IMAS-78:D08WFACXX:1:250018650	3.29	2.83	1.5	1.41	72.61	72.86	2.22	1.86	118.62	115.77	55.67	54.96	0.47	0.48	1.09	1.46	4.4	1.11	11.02	15.72	1.04	0.89	1.43	1.39	2.15	1.92	13.47	13.2
IMAS-79:D08WFACXX:1:250018651	3.67	3.45	1.55	1.47	69.04	68.82	2.35	2.08	122.43	120.76	52.67	51.14	0.43	0.41	1	1.11	2.5	-1.81	9.49	6.99	1.11	1.04	1.51	1.5	2.34	2.22	13.41	12.96
IMAS-8:D08WFACXX:1:250018577	2.81	2.13	1.63	1.63	70.25	70.24	3.22	3.48	133.52	134.83	58.68	58.7	0.44	0.43	0.97	1	3.51	-0.25	9.11	5.08	1.09	0.98	1.31	1.23	1.9	1.56	13.73	14.1
IMAS-80:D08WFACXX:1:250018652	3.7	3.61	1.77	1.82	74.69	74.95	2.57	2.53	124.26	123.81	57.04	56.92	0.46	0.46	0.97	0.97	5.83	4.9	8.05	4.86	1.07	1.01	1.32	1.24	2.35	2.31	14.27	14.98
IMAS-81:D08WFACXX:1:250018653	5.02	5.17	2.17	2.39	72.73	72.85	1.03	0.55	128.5	128.57	69.53	70.98	0.51	0.53	1.08	1.2	10.23	10.3	9	7.32	1.33	1.42	1.49	1.47	3.01	3.08	13.4	13.21
IMAS-82:D08WFACXX:1:250018654	3.43	3.3	1.86	1.93	72.17	72.25	0.52	-0.08	122.37	121.77	44.91	43.42	0.39	0.37	0.99	1.02	2.8	1.23	8.62	6.5	1.2	1.22	1.67	1.72	2.21	2.15	13.82	14.04
IMAS-83:D08WFACXX:1:250018655	3.58	3.3	1.65	1.62	75.51	76.12	2.94	3.03	128.7	128.24	63.61	64.56	0.48	0.49	1.08	1.39	2.38	-1.96	11	15.75	1.32	1.51	1.48	1.47	2.29	2.15	14.13	15.37
IMAS-84:D08WFACXX:1:250018656	3.93	3.89	1.64	1.64	73.59	73.74	1.87	1.62	123.11	122.33	51.45	50.48	0.43	0.42	0.92	0.88	5.42	4.43	8.21	5.26	1.05	0.98	1.11	0.98	2.47	2.45	13.16	12.73
IMAS-85:D08WFACXX:1:250018657	3.72	3.57	1.37	1.18	74.48	74.86	2.72	2.67	121.47	119.9	45.11	42.55	0.39	0.36	0.95	0.92	2.57	-1.7	8.38	3.1	1.16	1.14	1.4	1.35	2.36	2.28	14.07	14.9
IMAS-86:D08WFACXX:1:250018658	3.28	3.14	2.05	2.24	73.11	73.26	2.99	3.03	123.12	122.57	60.25	60.58	0.46	0.47	0.95	0.94	3.67	2.33	8.36	5.64	1.09	1.04	1.31	1.24	2.14	2.07	14.15	14.71
IMAS-87:D08WFACXX:1:250018659	5.7	5.95	1.45	1.37	63	62.58	2.84	2.85	104.85	101.52	49.07	47.99	0.47	0.48	0.96	0.95	4.92	3.81	7.96	4.76	1.27	1.32	1.52	1.52	3.35	3.48	13.36	13.15
IMAS-88:D08WFACXX:1:250018660	3.97	3.94	2	2.15	71.28	71.32	2.54	2.47	136.72	138.15	56.48	56.37	0.42	0.41	0.98	0.99	2.88	1.35	7.81	4.28	1.17	1.17	1.67	1.71	2.48	2.47	14.03	14.49
IMAS-89:D08WFACXX:1:250018661	3.77	3.7	1.37	1.26	76.09	76.38	0.47	-0.16	131.99	132.55	57.15	56.99	0.43	0.42	0.98	1	4.37	3.14	9.87	9.5	1.25	1.3	1.48	1.46	2.38	2.35	13.34	13.09
IMAS-9:D08WFACXX:1:250018614	3.48	3.36	2.14	2.33	70.74	70.74	1.44	1.07	120.67	119.21	55.77	55.28	0.47	0.47	0.94	0.92	3.3	1.84	8.14	5.37	1.09	1.03	1.33	1.26	2.24	2.18	13.25	12.91
IMAS-90:D08WFACXX:1:250018662	3.57	3.47	1.41	1.34	76.32	76.64	2.73	2.71	114.7	112.57	55.55	55.23	0.47	0.47	0.9	0.83	7.89	7.44	10.84	12.17	1.14	1.11	1.22	1.12	2.28	2.23	13.95	14.36
IMAS-91:D08WFACXX:1:250018663	4.65	4.81	1.72	1.77	70.57	70.56	0.89	-0.01	103.61	96.7	44.77	41.5	0.42	0.41	1.05	1.22	3.25	0.71	9.7	8.83	1.31	1.43	1.43	1.4	2.83	2.91	13.27	12.72
IMAS-92:D08WFACXX:1:250018664	3.93	3.8	1.59	1.57	68.95	68.74	2.94	3.03	136.74	139.01	54.4	53.31	0.41	0.38	1.04	1.25	2.39	-1.95	9.45	6.86	1.31	1.46	1.21	1.11	2.46	2.4	13.32	12.75
IMAS-93:D08WFACXX:1:250018665	3.93	3.89	1.54	1.53	76.48	76.79	1.21	0.79	128.05	128.16	61	61.33	0.48	0.49	1.09	1.21	3.85	2.49	10.59	11.45	1.11	1.07	1.4	1.36	2.47	2.45	13.66	13.72
IMAS-94:D08WFACXX:1:250018666	4.97	5.09	1.31	1.18	72.53	72.66	2.86	2.88	128.52	128.75	62.61	63.09	0.48	0.48	0.88	0.8	1.83	0.05	9.29	7.87	1.22	1.24	1.48	1.45	2.98	3.04	13.63	13.7
IMAS-95:D08WFACXX:1:250018667	4.52	4.59	1.09	0.9	72.41	72.5	4.08	4.42	109.64	106.86	47.86	46.45	0.45	0.45	1.16	1.34	3.81	2.47	10.31	10.55	1.19	1.2	1.52	1.5	2.76	2.79	12.85	12.13
IMAS-96:D08WFACXX:1:250018668	3.76	3.63	1.67	1.69	72.93	73.13	2.43	2.28	131.55	132.18	62.13	62.76	0.47	0.48	0.97	0.99	2.54	-1.71	9.2	6.63	1.29	1.42	1.52	1.52	2.38	2.31	13.83	14.28
IMAS-97:D08WFACXX:2:250018700	3.67	3.58	0.97	0.72	74.14	74.36	6.18	7.22	115.89	113.42	49.65	48.2	0.43	0.42	0.92	0.88	1.82	0.04	8.32	5	1.07	1	1.24	1.15	2.34	2.29	13.63	13.66
IMAS-98:D08WFACXX:2:250018701	5.13	5.29	1.41	1.32	74.81	75.04	3.13	3.21	144.42	146.61	66.16	67.15	0.46	0.46	0.9	0.85	21.97	24.61	7.57	3.52	1.17	1.16	1.49	1.49	3.07	3.15	13.97	14.34
IMAS-99:D08WFACXX:2:250018702	3.61	3.52	1.56	1.53	74.28	74.48	2.79	2.78	118.11	116.62	45.11	43.49	0.41	0.39	0.93	0.9	1.8	0	8.23	5.32	1.17	1.17	1.5	1.49	2.31	2.26	14.16	14.72

## Sheet: DHpops
Genotype	NCLB	BLUP_AD	AD	BLUP_PH	PH	BLUP_EPO	EPO	BLUP_HC	HC	BLUP_ER	ER	BLUP_GLS	GLS	BLUP_TEX	TEX	BLUP_EA	EA	BLUP_PA	PA
(CLWN201/CML504)DH1	2.42	78.47	77.3	203.9	194.06	0.47	0.49	6.86	6	12.14	13.25	2.2	2.11	1.85	1.78	2.24	2.14	2.37	2.02
(CLWN201/CML504)DH10	2.41	78.87	78.87	211.32	203.47	0.46	0.47	4.01	-0.08	10.58	9.8	1.98	1.75	2.01	2.01	2.24	2.05	2.4	2.32
(CLWN201/CML504)DH100	2.05	78.86	78.74	206.04	195.67	0.47	0.48	4.29	0.45	10.65	9.92	2.07	1.89	1.84	1.76	2.24	2.2	2.41	2.5
(CLWN201/CML504)DH101	3.2	79.37	80.54	223.36	230.04	0.47	0.49	8.12	8.76	10.36	9.28	2.29	2.25	2.19	2.3	2.24	2.12	2.36	1.95
(CLWN201/CML504)DH102	1.69	78.6	77.79	201.04	188.74	0.48	0.51	9.11	10.97	13.82	16.96	2.05	1.87	1.82	1.75	2.24	2.67	2.38	2.1
(CLWN201/CML504)DH103	1.45	79.23	80.06	207.74	200.73	0.48	0.51	5.3	2.47	11.61	12.02	1.97	1.75	1.66	1.49	2.24	1.64	2.36	1.95
(CLWN201/CML504)DH104	2.54	77.83	75.23	205.39	197.62	0.48	0.5	11.58	16.33	15.17	19.96	2.22	2.13	2.18	2.31	2.24	2.47	2.39	2.25
(CLWN201/CML504)DH105	2.94	78.74	78.43	204.27	194.52	0.48	0.49	5.5	3.09	10.63	9.91	2.53	2.62	2.18	2.29	2.24	2.47	2.41	2.49
(CLWN201/CML504)DH106	1.81	79.01	79.36	216.19	212.51	0.48	0.49	5.76	3.73	11.94	12.8	1.89	1.62	1.85	1.78	2.24	2.2	2.39	2.23
(CLWN201/CML504)DH107	1.84	78.74	78.49	210.9	204.19	0.48	0.49	7.14	6.65	14.18	17.76	2.49	2.56	2.03	2.06	2.24	2.12	2.42	2.57
(CLWN201/CML504)DH108	2.33	79.51	81.11	211.52	208.95	0.48	0.5	4.46	0.86	10.84	10.36	2.11	1.95	1.86	1.8	2.24	2.32	2.37	2.03
(CLWN201/CML504)DH109	1.55	78.28	76.75	205.75	194.09	0.47	0.48	6.75	5.73	10.17	8.68	1.94	1.69	2.01	2.02	2.24	2.05	2.43	2.73
(CLWN201/CML504)DH11	2.42	78.08	76.01	201.54	188.21	0.46	0.47	9.68	12.22	13.67	16.64	2.13	2	1.87	1.81	2.24	2.9	2.45	2.94
(CLWN201/CML504)DH110	2.06	78.09	76.18	207.17	197.99	0.48	0.49	7	6.33	15.09	19.78	1.84	1.55	2	1.99	2.24	2.07	2.37	2.06
(CLWN201/CML504)DH111	1.42	79.01	79.41	203.05	192.44	0.46	0.47	6.5	5.29	10.8	10.27	1.7	1.32	2.02	2.01	2.24	2.47	2.44	2.8
(CLWN201/CML504)DH112	1.7	78.62	78.19	194.29	173.25	0.5	0.53	9.25	11.21	11.64	12.11	2.13	2	1.72	1.59	2.24	2	2.35	1.79
(CLWN201/CML504)DH113	2.94	78.76	78.68	207.76	199.56	0.47	0.47	6.73	5.72	11.83	12.54	2.38	2.38	2.05	2.09	2.24	1.79	2.4	2.38
(CLWN201/CML504)DH114	3.44	78.57	77.9	220.68	219.89	0.48	0.49	12.1	17.44	11.13	11.01	2.47	2.52	2.17	2.26	2.24	2.27	2.42	2.55
(CLWN201/CML504)DH115	4.33	76.81	71.97	202.04	188.9	0.45	0.44	4.58	0.73	16.87	24.27	2.59	2.73	2.19	2.29	2.24	2.75	2.45	2.9
(CLWN201/CML504)DH116	2.59	78.24	76.95	203.61	191.03	0.46	0.46	5.78	3.69	18.8	27.95	2.02	1.82	2.35	2.55	2.24	2.7	2.45	2.89
(CLWN201/CML504)DH117	1.92	79.18	79.9	219.02	220.95	0.49	0.52	4.89	1.7	14.79	19.11	2.09	1.94	2.04	2.08	2.24	2.75	2.41	2.48
(CLWN201/CML504)DH118	2.81	79.03	79.42	210.42	205.38	0.47	0.47	4.93	1.87	11.8	12.46	2.34	2.32	2.02	2.05	2.24	2.2	2.41	2.41
(CLWN201/CML504)DH119	3.08	78.43	77.37	212.49	208.21	0.47	0.47	5.27	2.6	14.71	18.91	2.69	2.87	2.19	2.32	2.24	2.42	2.41	2.46
(CLWN201/CML504)DH12	2.3	78.96	79.14	208.58	200.28	0.47	0.48	11.93	17.06	16.91	23.81	2.19	2.07	1.68	1.53	2.24	1.99	2.39	2.31
(CLWN201/CML504)DH120	2.81	78.25	76.88	210.45	206.46	0.47	0.48	6.57	5.43	13.84	16.97	2.57	2.69	2.19	2.3	2.24	2.4	2.42	2.59
(CLWN201/CML504)DH121	2.11	78.33	76.91	196.67	182.28	0.47	0.48	11.92	17.08	13.85	17.03	2.02	1.82	2.02	2.05	2.24	2.7	2.45	2.9
(CLWN201/CML504)DH122	3.15	78.48	77.59	211.46	204.6	0.47	0.48	8.8	10.29	14.17	17.74	2.05	1.87	2.03	2.07	2.24	2.42	2.4	2.31
(CLWN201/CML504)DH124	2.05	78.13	76.25	209.46	202.54	0.47	0.49	4.63	1.12	14.11	17.58	2.18	2.07	2.03	2.04	2.24	2.2	2.42	2.56
(CLWN201/CML504)DH125	2.84	78.73	78.31	206.91	197.45	0.49	0.51	14.37	22.35	15.9	21.52	2.44	2.49	1.67	1.49	2.24	2.2	2.4	2.39
(CLWN201/CML504)DH126	2.09	79.66	81.58	209.01	201.73	0.47	0.47	7.49	7.47	14.87	19.62	2.09	1.93	1.85	1.81	2.24	2.49	2.41	2.42
(CLWN201/CML504)DH127	1.56	78.27	76.88	203.18	194	0.47	0.47	7.61	7.67	15.06	19.69	2.25	2.18	1.67	1.49	2.24	1.97	2.42	2.62
(CLWN201/CML504)DH128	2.32	79.2	79.96	209.24	202.99	0.47	0.49	4.29	0.5	9.44	7.26	2.1	1.94	2.18	2.28	2.24	2.05	2.41	2.45
(CLWN201/CML504)DH129	2.74	78.4	77.2	213.28	209.13	0.47	0.48	10.73	14.47	16.68	23.29	1.98	1.76	2.19	2.29	2.24	2.7	2.39	2.28
(CLWN201/CML504)DH13	1.94	79.23	80.07	212.51	208.26	0.48	0.5	4.28	-0.45	9.84	7.56	2.3	2.25	1.84	1.76	2.24	2.41	2.36	1.85
(CLWN201/CML504)DH130	2.7	77.82	75.44	207.82	200.78	0.46	0.46	5.86	3.94	14.74	18.98	1.92	1.68	2.02	2.03	2.24	2.45	2.41	2.47
(CLWN201/CML504)DH131	1.93	78.64	77.94	197.57	179.68	0.47	0.47	5.18	2.46	16.64	23.21	2.13	2	1.87	1.81	2.24	2.55	2.43	2.63
(CLWN201/CML504)DH132	2.87	78.42	77.43	207.52	200.26	0.47	0.47	7.28	6.98	11.82	12.53	2.26	2.19	1.87	1.81	2.24	2.42	2.43	2.64
(CLWN201/CML504)DH133	2.08	78.98	79.35	211.49	207.99	0.47	0.49	5.43	2.89	9.27	6.87	1.97	1.75	2.51	2.8	2.24	2.1	2.34	1.75
(CLWN201/CML504)DH134	2.33	78.84	78.78	209.8	202.9	0.45	0.44	5.88	3.9	10.15	8.83	2.05	1.87	2.86	3.32	2.24	2.75	2.38	2.19
(CLWN201/CML504)DH135	2.47	78.69	78.4	201.9	189.62	0.47	0.47	5.97	4.09	13.18	15.53	2.4	2.42	1.86	1.8	2.24	2.2	2.39	2.3
(CLWN201/CML504)DH136	1.19	79.74	81.64	209.04	203.78	0.46	0.47	4.04	-0.13	11.65	12.15	1.97	1.74	2.16	2.25	2.24	2.2	2.37	2.07
(CLWN201/CML504)DH137	1.72	78.71	78.24	205.61	195.86	0.47	0.49	14.27	22.16	13.78	16.85	1.81	1.49	2.03	2.05	2.24	2.62	2.43	2.73
(CLWN201/CML504)DH139	3.07	77.34	73.63	197.32	181.4	0.45	0.44	6.37	5.03	17.79	25.73	2.42	2.45	2.17	2.27	2.24	2.5	2.46	2.97
(CLWN201/CML504)DH14	2.94	79.88	82.44	207.77	197.02	0.47	0.48	4.17	-0.2	8.85	5.58	2.1	1.95	2	2.01	2.24	2.85	2.45	2.89
(CLWN201/CML504)DH141	2.45	78.5	77.79	208.19	201.39	0.48	0.5	4.63	1.17	14.56	18.56	2.04	1.87	2.02	2.04	2.24	2.7	2.4	2.32
(CLWN201/CML504)DH142	2.38	78.53	77.96	214.5	211.77	0.47	0.48	6.36	4.92	9.7	7.85	1.98	1.76	2.02	2.05	2.24	2.32	2.4	2.37
(CLWN201/CML504)DH143	2.84	78.38	77.34	206.63	196.03	0.48	0.51	5.82	3.85	13.17	15.51	2.54	2.63	1.87	1.82	2.24	2.67	2.45	2.88
(CLWN201/CML504)DH146	3.34	79	79.27	216.68	214.96	0.47	0.49	4.58	1.1	13.22	15.62	2.3	2.26	2.02	2.03	2.24	2.42	2.41	2.49
(CLWN201/CML504)DH147	3.7	78.76	78.34	212.23	208.59	0.46	0.47	3.91	-0.4	10.3	9.18	2.48	2.55	2.36	2.56	2.24	1.99	2.36	1.95
(CLWN201/CML504)DH148	1.8	78.81	78.78	214.05	211.27	0.47	0.48	9.25	11.24	11.72	12.34	1.82	1.5	1.87	1.8	2.24	1.9	2.4	2.32
(CLWN201/CML504)DH149	1.55	79.62	81.37	216.94	215.55	0.48	0.5	9.05	10.86	8.11	4.36	2.05	1.87	2.2	2.31	2.24	2.2	2.39	2.23
(CLWN201/CML504)DH15	1.86	78.02	76.06	216.26	214.3	0.47	0.48	8.41	9.41	12.64	14.36	2.14	2.01	1.71	1.57	2.24	1.77	2.37	2.03
(CLWN201/CML504)DH151	1.81	77.99	75.78	202.87	191.71	0.48	0.5	16.49	27.02	15.54	20.76	2.11	1.95	1.97	1.96	2.24	2.4	2.41	2.51
(CLWN201/CML504)DH152	4.54	77.27	73.55	198.98	182.41	0.47	0.47	3.66	-0.85	17.22	24.49	2.65	2.81	1.71	1.57	2.24	2.94	2.44	2.73
(CLWN201/CML504)DH154	1.68	79.07	79.51	215.54	214.09	0.47	0.49	5.68	3.46	11.19	11.13	1.99	1.76	2.34	2.54	2.24	2.35	2.45	2.87
(CLWN201/CML504)DH156	3.07	78.83	78.68	218.93	220.75	0.47	0.49	9.55	11.93	13.73	16.74	2.19	2.07	2.67	3.02	2.24	2.77	2.41	2.51
(CLWN201/CML504)DH157	2.82	78.85	78.81	219.32	221.49	0.49	0.51	6.44	5.05	11.85	12.56	2.29	2.25	2.22	2.36	2.24	2.45	2.36	1.95
(CLWN201/CML504)DH158	2.2	77.94	75.85	218.38	219.98	0.48	0.49	4.91	1.77	11.97	12.85	2.38	2.38	2.18	2.28	2.24	1.92	2.37	2.05
(CLWN201/CML504)DH159	2.56	79.24	79.96	212.41	208.7	0.47	0.47	11	15.11	10.62	9.88	1.9	1.63	1.86	1.79	2.24	2.05	2.36	1.93
(CLWN201/CML504)DH16	2.8	78.45	77.56	205.41	195.62	0.48	0.51	3.92	-0.23	12.97	15.05	2.44	2.49	2.02	2.05	2.24	2.4	2.4	2.38
(CLWN201/CML504)DH160	3.2	78.43	77.41	208.69	201.77	0.48	0.5	5.34	2.78	14.69	18.9	2.3	2.25	2.03	2.04	2.24	2.47	2.43	2.68
(CLWN201/CML504)DH161	3.55	78.82	78.7	209.97	203.17	0.47	0.49	3.61	-1.04	11.56	11.94	2.29	2.25	2.03	2.06	2.24	2.05	2.37	2.01
(CLWN201/CML504)DH162	2.97	78.51	77.69	202.77	192.89	0.47	0.49	6.46	5.15	16.16	22.13	2.21	2.12	2.02	2.04	2.24	2.87	2.38	2.13
(CLWN201/CML504)DH163	2.2	78.62	78	211.88	207.05	0.47	0.48	6.86	6.02	13.08	15.32	1.94	1.69	2.15	2.22	2.24	2.25	2.36	1.88
(CLWN201/CML504)DH164	1.97	78.29	76.94	218	218.51	0.47	0.48	5.21	2.42	13.43	16.08	1.88	1.61	1.85	1.78	2.24	2.32	2.39	2.2
(CLWN201/CML504)DH165	2.59	77.62	74.76	211.75	207.36	0.46	0.45	6.38	5.06	13.26	15.68	2.61	2.75	1.85	1.75	2.24	2.34	2.4	2.4
(CLWN201/CML504)DH166	1.22	78.96	79.36	214.61	213.14	0.48	0.51	15.11	24.01	12.22	13.39	1.98	1.75	2.02	2.04	2.24	2.4	2.37	2.06
(CLWN201/CML504)DH167	2.07	78.25	76.68	209.7	203.76	0.48	0.49	7.05	6.48	12.52	14.12	2.1	1.95	1.99	1.98	2.24	1.92	2.42	2.56
(CLWN201/CML504)DH168	2.3	78.8	78.71	206.4	197.2	0.47	0.49	23.11	41.38	12.86	14.83	1.93	1.68	1.85	1.77	2.24	2.57	2.46	2.99
(CLWN201/CML504)DH169	2.43	78.35	77.32	209.69	204.21	0.48	0.51	7.9	8.31	12.71	14.48	2.17	2.06	2.36	2.55	2.24	2.47	2.4	2.31
(CLWN201/CML504)DH17	2.33	77.78	75.25	208.01	198.69	0.46	0.46	7.78	8.03	11.82	12.54	1.89	1.62	1.68	1.53	2.24	1.97	2.36	1.89
(CLWN201/CML504)DH170	3.04	78.96	79.23	214.57	211.14	0.46	0.47	3.83	-0.59	12.98	15.08	1.99	1.77	1.85	1.78	2.24	2.6	2.43	2.69
(CLWN201/CML504)DH171	3.04	78.68	78.05	202.42	190.61	0.47	0.48	11.02	15.1	10.95	10.59	2.18	2.06	2.16	2.25	2.24	2.27	2.38	2.12
(CLWN201/CML504)DH172	2.46	77.61	74.61	202.9	193.21	0.49	0.53	5.03	2.07	12.08	13.09	2.3	2.26	1.86	1.8	2.24	2.55	2.38	2.14
(CLWN201/CML504)DH173	2.42	78.51	77.64	204.5	194.91	0.47	0.48	5.35	2.79	13.14	15.43	2.42	2.44	2.02	2.03	2.24	1.85	2.41	2.43
(CLWN201/CML504)DH174	2.33	79.65	81.5	212.61	209.07	0.46	0.47	6.74	5.77	11.21	11.17	2.05	1.88	1.84	1.75	2.24	2.35	2.45	2.89
(CLWN201/CML504)DH175	2.96	79.08	79.62	203.46	191.17	0.48	0.5	4.98	1.68	10.52	9.5	2.33	2.31	2.18	2.29	2.24	2.62	2.4	2.38
(CLWN201/CML504)DH176	2.47	79.34	80.54	216.63	217.27	0.48	0.51	8.92	10.52	11.84	12.55	2.53	2.62	1.85	1.79	2.24	2.6	2.36	1.9
(CLWN201/CML504)DH177	2.3	79.55	81.03	198.22	182.4	0.46	0.47	5.62	3.38	9.48	7.35	2.14	2	1.87	1.83	2.24	2.32	2.41	2.51
(CLWN201/CML504)DH178	2.3	78.35	77.21	200.9	184.95	0.47	0.48	11.51	16.64	13.5	16.44	2.06	1.88	1.71	1.56	2.24	2.47	2.45	2.93
(CLWN201/CML504)DH179	2.2	78.52	77.7	204.68	194.13	0.48	0.5	6.77	5.92	13.56	16.37	2.14	2	1.86	1.8	2.24	2.35	2.46	2.99
(CLWN201/CML504)DH18	2.46	78.44	77.39	216.38	216.46	0.47	0.49	7.46	7.32	11.67	12.22	2.13	1.99	1.71	1.57	2.24	2.62	2.4	2.35
(CLWN201/CML504)DH180	2.54	78.25	76.78	200.96	188.92	0.47	0.48	4.26	0	11.54	11.88	2.05	1.87	1.88	1.83	2.24	1.99	2.39	2.3
(CLWN201/CML504)DH181	2.48	78.71	78.22	213.73	211.13	0.47	0.48	5.32	2.73	11.64	12.14	2.31	2.27	2.18	2.29	2.24	2.42	2.42	2.57
(CLWN201/CML504)DH182	1.83	77.75	75.16	211.43	206.95	0.47	0.47	4.2	0.26	12.11	13.15	2.17	2.06	1.89	1.84	2.24	1.87	2.42	2.57
(CLWN201/CML504)DH183	3.19	78.26	76.83	206.93	198.15	0.47	0.47	5.44	3.01	10.81	10.32	2.41	2.44	2.03	2.06	2.24	2.2	2.41	2.49
(CLWN201/CML504)DH184	2.85	78.88	79.1	199.54	185.26	0.46	0.45	4.49	0.65	11.37	11.45	2.02	1.82	1.72	1.59	2.24	2	2.4	2.39
(CLWN201/CML504)DH185	2.44	78.24	76.63	201.84	189.26	0.47	0.48	4.78	1.23	13.13	15.59	2.13	1.99	2.03	2.05	2.24	2.27	2.44	2.82
(CLWN201/CML504)DH186	1.43	79.66	81.55	210.25	205.23	0.48	0.49	6.21	4.68	10.92	10.55	2.05	1.87	2.36	2.57	2.24	2.57	2.39	2.23
(CLWN201/CML504)DH187	3.09	78.59	77.91	214.75	213.31	0.47	0.48	3.67	-0.92	13.61	16.48	2.31	2.26	2.04	2.06	2.24	2.2	2.4	2.31
(CLWN201/CML504)DH188	1.94	78.61	77.79	201.1	186.14	0.47	0.48	7.83	8.17	10.68	10	2.13	2	2.67	3.04	2.24	2.05	2.37	2.05
(CLWN201/CML504)DH189	2.95	77.93	75.84	201.12	185.63	0.48	0.5	9.31	11.39	18.29	26.82	2.54	2.63	1.84	1.76	2.24	2.75	2.41	2.45
(CLWN201/CML504)DH19	3.17	78.93	79.06	208.39	198.83	0.47	0.48	6.48	5.15	13.89	17.13	2.06	1.88	2.04	2.08	2.24	2.17	2.44	2.74
(CLWN201/CML504)DH194	3.05	78.26	76.82	206.85	196.61	0.47	0.48	5.46	2.8	12.02	13.02	2.34	2.32	2.01	2.03	2.24	2.05	2.4	2.37
(CLWN201/CML504)DH195	2.46	78.16	76.36	209.4	201.77	0.46	0.46	10.92	14.84	9.59	7.59	2.13	1.99	2.04	2.09	2.24	1.77	2.45	2.87
(CLWN201/CML504)DH196	2.35	79.02	79.53	209.42	202.54	0.46	0.46	4.56	1.01	16.26	22.35	2.17	2.06	2.02	2.05	2.24	2.47	2.39	2.3
(CLWN201/CML504)DH197	3.51	77.81	75.02	209.41	201.51	0.47	0.49	9.14	11.02	13.36	15.94	2.45	2.5	2.35	2.55	2.24	2.62	2.43	2.63
(CLWN201/CML504)DH198	1.92	78.24	76.81	204.35	192.21	0.47	0.48	8.51	9.67	12.76	14.6	1.94	1.69	2.18	2.29	2.24	2.4	2.42	2.56
(CLWN201/CML504)DH199	2.57	78.44	77.29	210.92	206.45	0.47	0.48	4.47	0.83	11.76	12.41	2.48	2.55	1.71	1.57	2.24	2.2	2.4	2.33
(CLWN201/CML504)DH2	2.45	78.79	78.63	192.65	174.58	0.48	0.5	9.84	12.52	13.42	16.07	2.12	1.99	2.37	2.56	2.24	2.82	2.4	2.32
(CLWN201/CML504)DH20	3.59	78.25	76.76	210.68	203.68	0.47	0.47	6.93	6.24	11.62	12.11	2	1.77	2	2.02	2.24	2.25	2.4	2.37
(CLWN201/CML504)DH200	2.06	79.24	80.12	203.59	191.52	0.47	0.47	4.6	1.16	14.47	18.4	2.05	1.87	1.84	1.76	2.24	1.97	2.4	2.31
(CLWN201/CML504)DH201	2.28	78.87	78.84	216.09	214.74	0.48	0.49	7.84	8.15	13.43	16.12	2.34	2.32	1.85	1.77	2.24	2.55	2.36	1.93
(CLWN201/CML504)DH202	1.96	77.85	75.64	212.58	210.72	0.48	0.51	4.71	1.39	13.87	17.04	2.25	2.19	2.19	2.31	2.24	2.62	2.39	2.2
(CLWN201/CML504)DH204	3.39	78.36	77.02	217.56	216.4	0.47	0.48	6.1	4.39	14.07	17.52	2.12	1.96	2.18	2.29	2.24	2.77	2.37	2.08
(CLWN201/CML504)DH205	3.44	78.55	77.84	212.28	206.66	0.47	0.47	7.41	7.21	13.18	15.53	2	1.8	2.04	2.07	2.24	2.05	2.4	2.39
(CLWN201/CML504)DH206	2.24	78.88	78.85	200.22	180.22	0.46	0.46	8.71	10.12	15.68	22.18	2.16	2.03	2.18	2.28	2.24	2.77	2.45	2.88
(CLWN201/CML504)DH207	3.08	78.03	75.93	199.74	185.17	0.46	0.47	6.46	5.17	11.5	11.8	2.22	2.13	2.03	2.06	2.24	2	2.41	2.44
(CLWN201/CML504)DH21	2.06	79.6	81.37	212.74	206.19	0.48	0.51	4.77	1.17	14.45	18.64	2.02	1.82	1.68	1.53	2.24	2.25	2.38	2.12
(CLWN201/CML504)DH210	3.19	78.61	78.02	198.57	182.28	0.44	0.43	5.35	2.73	10.91	10.5	2.3	2.26	2.02	2.05	2.24	2.62	2.49	3.26
(CLWN201/CML504)DH211	1.82	77.61	74.63	198.33	184.26	0.47	0.48	11.33	15.74	13.52	16.31	2.04	1.87	1.68	1.53	2.24	2.55	2.4	2.37
(CLWN201/CML504)DH212	2.72	78.13	76.38	198.94	183.49	0.46	0.46	5.75	3.68	18.56	27.44	2.21	2.12	2.32	2.47	2.24	2.6	2.42	2.58
(CLWN201/CML504)DH213	2.7	79	79.38	214.52	211.62	0.49	0.51	6.87	6.05	12.73	14.54	2.18	2.07	2.35	2.55	2.24	2.12	2.39	2.29
(CLWN201/CML504)DH214	2.56	77.97	75.88	215.22	212.3	0.47	0.48	9.18	11.26	12.91	15.07	2.38	2.38	2.05	2.09	2.24	2.2	2.44	2.74
(CLWN201/CML504)DH215	2.33	79.61	81.63	205.74	194.53	0.47	0.48	5.83	3.85	11.02	10.76	2.14	2	2.01	2.02	2.24	2.32	2.45	2.93
(CLWN201/CML504)DH216	1.98	78.12	76.4	207.67	199.13	0.47	0.48	4.59	1.07	12.03	12.98	2.01	1.81	2.02	2.04	2.24	2.55	2.39	2.21
(CLWN201/CML504)DH217	1.91	78.82	78.41	202.22	188.17	0.47	0.49	7.96	8.39	11.98	12.9	2.14	2.01	1.82	1.74	2.24	2.5	2.47	3.06
(CLWN201/CML504)DH218	3.31	79.08	79.47	220.29	222.12	0.48	0.51	5.54	3.18	11.89	12.73	2.25	2.18	1.71	1.58	2.24	2.2	2.42	2.56
(CLWN201/CML504)DH22	1.85	78.17	76.46	203.51	193.39	0.47	0.48	7.15	6.63	12.42	13.91	2.09	1.94	1.86	1.8	2.24	2.9	2.45	2.89
(CLWN201/CML504)DH220	2.59	79.04	79.45	207.85	200.85	0.47	0.48	4.58	1.07	14.24	17.87	1.94	1.69	1.68	1.51	2.24	2.7	2.44	2.82
(CLWN201/CML504)DH221	3.41	79.37	80.64	207.94	200.07	0.47	0.48	6.43	5.11	11.3	11.38	2.49	2.56	1.7	1.55	2.24	2.42	2.4	2.4
(CLWN201/CML504)DH224	1.58	78.85	78.72	207.79	199.42	0.48	0.49	3.97	-0.25	10.86	10.39	2.04	1.86	2.02	2.04	2.24	2.2	2.37	2
(CLWN201/CML504)DH226	3.18	78.5	77.69	198.74	182.5	0.46	0.47	17.4	28.99	10.02	8.55	2.37	2.38	2.02	2.04	2.24	2.27	2.41	2.49
(CLWN201/CML504)DH227	2.58	78.62	78.1	219.88	221.48	0.47	0.48	19.89	34.43	12.14	13.23	2.22	2.13	1.89	1.85	2.24	2.7	2.4	2.38
(CLWN201/CML504)DH228	2.58	78.44	77.66	208.85	203.61	0.48	0.5	6.84	5.96	14.27	17.9	2.3	2.26	1.9	1.87	2.24	2.32	2.43	2.62
(CLWN201/CML504)DH229	1.95	78.6	77.94	206.17	197.66	0.48	0.5	8.89	10.46	14.31	18.04	2.26	2.19	1.68	1.52	2.24	1.92	2.35	1.87
(CLWN201/CML504)DH23	3.42	77.89	75.46	204.4	191.57	0.47	0.48	8.64	9.92	11.62	12.1	2.26	2.19	1.69	1.53	2.24	2.4	2.43	2.73
(CLWN201/CML504)DH231	3.27	77.92	75.8	208.11	198.55	0.48	0.5	5.59	3.33	9.5	7.37	2.09	1.93	1.84	1.75	2.24	2.05	2.36	1.94
(CLWN201/CML504)DH233	1.59	80.4	84.02	203.35	191.97	0.48	0.5	15.15	24.83	10.61	9.7	1.9	1.63	1.7	1.55	2.24	2.47	2.46	2.99
(CLWN201/CML504)DH234	3.21	77.78	75.16	200.22	184.19	0.47	0.47	10.73	14.38	11.96	12.86	2.05	1.87	1.86	1.81	2.24	2.27	2.44	2.74
(CLWN201/CML504)DH235	2.22	77.91	75.62	210.79	206.04	0.48	0.5	8.56	9.7	8.47	5.09	2.3	2.26	1.88	1.83	2.24	1.7	2.39	2.27
(CLWN201/CML504)DH24	2.68	78.95	79.2	198.57	183.18	0.47	0.48	5.08	2.17	11.71	12.31	2.77	3	1.85	1.77	2.24	2.57	2.47	3.12
(CLWN201/CML504)DH25	1.9	78.43	77.43	197.04	181.44	0.47	0.48	5.61	3.1	9.46	7.03	2.09	1.92	2	1.99	2.24	2.46	2.45	2.96
(CLWN201/CML504)DH26	3.08	78.59	77.92	203.19	193.02	0.47	0.48	7.56	7.62	12.96	15.32	2.79	3.05	2.05	2.08	2.24	2.55	2.43	2.68
(CLWN201/CML504)DH27	2.44	78.96	79.4	217.93	218.26	0.47	0.48	5.93	4.01	12.83	14.77	2.17	2.06	2.18	2.28	2.24	2.77	2.38	2.17
(CLWN201/CML504)DH28	2.24	79.02	79.38	211.41	206.6	0.49	0.51	9.5	11.82	10.72	10.09	2.24	2.17	2.49	2.74	2.24	2.53	2.41	2.49
(CLWN201/CML504)DH29	3.04	78.11	76.43	211.41	205.86	0.47	0.48	6.51	5.17	13.34	16.05	2.38	2.39	2.04	2.08	2.24	2.53	2.45	2.91
(CLWN201/CML504)DH3	1.72	79.28	80.26	205.23	196.79	0.47	0.49	4.89	1.72	12.27	13.51	2.13	2	2.02	2.04	2.24	2.32	2.35	1.82
(CLWN201/CML504)DH30	1.92	78.89	79.06	216.61	214.55	0.47	0.48	7.28	6.99	11.76	12.41	1.82	1.51	2.18	2.27	2.24	2.35	2.39	2.24
(CLWN201/CML504)DH31	2.3	78.29	77.03	205.43	195.5	0.46	0.45	12.06	17.89	15.73	21.6	2.39	2.39	1.86	1.78	2.24	2.77	2.42	2.62
(CLWN201/CML504)DH32	2.58	78.95	79.12	213.78	210.97	0.47	0.49	5.87	3.9	14.43	18.33	2.1	1.95	2.2	2.31	2.24	2.97	2.44	2.78
(CLWN201/CML504)DH33	2.33	78.03	75.94	211.25	205	0.48	0.49	6.08	4.41	11.31	11.41	1.98	1.75	1.86	1.8	2.24	2.47	2.38	2.2
(CLWN201/CML504)DH34	1.93	78.84	78.77	206.92	196.21	0.48	0.5	15.22	24.25	12.05	13.03	2.02	1.82	1.68	1.52	2.24	2.67	2.39	2.25
(CLWN201/CML504)DH35	2.21	78.54	77.7	212.22	206.21	0.48	0.5	7.02	6.38	12.06	13.05	1.82	1.5	2.02	2.04	2.24	2.25	2.37	2.02
(CLWN201/CML504)DH37	2.68	78.91	78.94	213.33	210.72	0.47	0.47	4.3	0.49	12.46	13.95	2.28	2.23	1.7	1.54	2.24	2.47	2.46	2.95
(CLWN201/CML504)DH38	2.81	77.34	73.67	204.31	192.39	0.47	0.48	7.33	7.09	14.34	18.11	2.52	2.61	1.85	1.77	2.24	2.07	2.42	2.55
(CLWN201/CML504)DH39	2.44	78.61	78.1	208.69	201.77	0.47	0.47	7.65	7.76	13.73	16.76	2.02	1.81	1.68	1.52	2.24	2.35	2.39	2.2
(CLWN201/CML504)DH4	2.18	78.84	78.7	213.07	207.82	0.48	0.51	5.35	2.71	10.56	9.72	1.93	1.68	2.18	2.29	2.24	1.85	2.36	1.9
(CLWN201/CML504)DH40	3.44	78.38	77.14	206.56	198.61	0.48	0.49	14.44	22.55	17.59	25.3	2.13	2	2.03	2.04	2.24	2.27	2.41	2.43
(CLWN201/CML504)DH41	3.06	78.32	77.17	211.68	206.04	0.47	0.48	11.44	15.99	10.63	9.88	2.06	1.88	2.03	2.06	2.24	2.4	2.4	2.32
(CLWN201/CML504)DH42	2.3	79.09	79.76	208.63	200.6	0.48	0.5	5.53	3.11	11.48	11.78	2.14	2.01	2.18	2.27	2.24	2.2	2.38	2.19
(CLWN201/CML504)DH43	2.71	78.17	76.65	210.42	204.94	0.48	0.49	12.59	18.53	12.12	13.2	2.44	2.49	2.03	2.06	2.24	2.17	2.44	2.81
(CLWN201/CML504)DH44	1.82	79.03	79.38	205.37	197	0.47	0.48	14.86	23.44	10.78	10.21	2.02	1.82	1.86	1.79	2.24	2.12	2.41	2.46
(CLWN201/CML504)DH45	2.31	78.44	77.34	211	205.92	0.47	0.48	13.25	19.99	14.77	19.08	1.98	1.75	1.85	1.76	2.24	2.27	2.44	2.74
(CLWN201/CML504)DH46	2.83	78.26	76.69	211.72	206.08	0.47	0.48	7.16	6.72	10.65	9.96	2.26	2.19	1.84	1.75	2.24	1.99	2.39	2.25
(CLWN201/CML504)DH47	3.82	78.89	78.92	212.11	207.18	0.46	0.47	4.63	1.26	11.88	12.67	2.22	2.13	1.87	1.81	2.24	2.82	2.45	2.87
(CLWN201/CML504)DH48	2.23	78.07	76.16	201.17	188.84	0.47	0.48	7.57	7.59	12.83	14.73	1.95	1.7	1.87	1.81	2.24	2.05	2.38	2.19
(CLWN201/CML504)DH49	3.35	78.75	78.52	205.02	196.01	0.49	0.51	5.33	2.69	15.31	20.24	2.74	2.94	2.02	2.05	2.24	2.67	2.44	2.82
(CLWN201/CML504)DH5	1.86	79.64	81.45	210.63	205.65	0.47	0.47	4.36	0.63	10.39	9.34	2.23	2.14	2.37	2.59	2.24	2.47	2.37	2.01
(CLWN201/CML504)DH50	4.09	79	79.38	200.77	185.65	0.48	0.5	6.28	4.82	13.71	16.71	2.17	2.06	2.02	2.06	2.24	2.29	2.39	2.27
(CLWN201/CML504)DH51	2.16	79.25	80.29	210.35	202.27	0.48	0.51	6.75	5.8	10.75	10.17	2.01	1.81	1.87	1.81	2.24	2.2	2.33	1.61
(CLWN201/CML504)DH52	1.46	79.3	80.4	211.16	207.35	0.47	0.47	6.14	4.49	9.54	7.45	2.34	2.32	2.22	2.36	2.24	2.27	2.45	2.89
(CLWN201/CML504)DH53	1.56	80.03	82.88	203.48	191.65	0.48	0.51	5.57	3.21	9.72	7.88	2.21	2.12	1.86	1.79	2.24	3.03	2.44	2.75
(CLWN201/CML504)DH54	2.43	79.39	80.66	211.95	206.16	0.48	0.5	3.93	-0.32	9.16	6.67	2.33	2.31	2.02	2.04	2.24	2.47	2.42	2.55
(CLWN201/CML504)DH55	2.33	78.82	78.66	196.86	179.48	0.46	0.47	8.99	10.64	14.48	18.42	2.61	2.75	1.68	1.52	2.24	2.67	2.47	3.14
(CLWN201/CML504)DH56	2.3	78.68	78.4	208.34	199.36	0.46	0.47	7.82	8.13	16.01	21.78	1.96	1.74	1.68	1.53	2.24	2.47	2.46	2.95
(CLWN201/CML504)DH57	2.3	78.84	78.88	207.11	197.91	0.47	0.48	6.22	4.56	13.12	15.57	2.22	2.13	1.68	1.52	2.24	2.12	2.42	2.61
(CLWN201/CML504)DH58	2.94	78.81	78.92	206.59	196.95	0.48	0.49	4.25	0	13.86	17.27	2.13	2	1.7	1.54	2.24	1.99	2.41	2.51
(CLWN201/CML504)DH59	2.21	78.56	77.69	202.92	192.28	0.46	0.46	9.87	12.63	8.88	6.04	2.38	2.38	2.36	2.57	2.24	2.12	2.45	2.91
(CLWN201/CML504)DH6	2.47	79.09	79.66	215.57	214.84	0.47	0.47	5.37	2.84	11.18	11.11	2.05	1.87	2.01	2.03	2.24	2.47	2.38	2.18
(CLWN201/CML504)DH60	1.94	79.35	80.42	209.22	202.38	0.46	0.46	14.55	22.81	11.26	11.29	2.01	1.81	2.17	2.28	2.24	2.29	2.44	2.74
(CLWN201/CML504)DH61	3.18	78.11	76.18	209.24	199.03	0.48	0.5	7.92	8.4	12.63	14.36	2.11	1.95	1.71	1.58	2.24	2.55	2.4	2.39
(CLWN201/CML504)DH63	2.18	78.07	76.39	205.27	194.07	0.45	0.45	4.14	0.18	10.75	10.13	1.97	1.75	1.86	1.8	2.24	2.35	2.43	2.69
(CLWN201/CML504)DH64	1.83	78.51	77.38	208.3	201.38	0.47	0.49	7.88	8.26	13.99	17.34	2.29	2.25	2.01	2.01	2.24	2.32	2.35	1.84
(CLWN201/CML504)DH65	2.3	78.78	78.51	206.15	195.97	0.47	0.48	4.92	1.78	13.7	16.69	2.13	2	2.37	2.59	2.24	2.67	2.37	2.05
(CLWN201/CML504)DH66	2.54	78.07	76.2	209.8	201.25	0.47	0.48	11.56	16.26	10.36	9.29	2.18	2.06	2.17	2.26	2.24	2.32	2.38	2.12
(CLWN201/CML504)DH67	2.68	78.77	78.45	204.35	195	0.48	0.5	4.22	0.32	13.28	15.76	2.34	2.32	1.85	1.78	2.24	1.77	2.38	2.2
(CLWN201/CML504)DH68	2.34	78.55	77.91	205.49	196.1	0.46	0.46	11.08	15.14	11.88	12.64	1.98	1.75	2.03	2.06	2.24	2.32	2.42	2.52
(CLWN201/CML504)DH69	2.84	77.88	75.5	212.25	209.73	0.48	0.49	6.27	4.67	13.66	16.6	2.03	1.83	2.02	2.05	2.24	2.42	2.44	2.76
(CLWN201/CML504)DH7	2.49	79.48	80.93	211.22	207.92	0.47	0.49	10.23	13.38	12.28	13.54	2	1.8	1.7	1.55	2.24	2.52	2.42	2.57
(CLWN201/CML504)DH70	2.57	79.07	79.64	210.62	203.75	0.47	0.49	5.39	2.87	12.31	13.62	2.21	2.12	2.04	2.07	2.24	1.87	2.41	2.44
(CLWN201/CML504)DH71	2.06	79.07	79.38	219.57	220.05	0.47	0.48	11.27	16.02	15.29	20.59	2.09	1.93	1.7	1.57	2.24	2.07	2.39	2.25
(CLWN201/CML504)DH72	1.9	79.03	79.63	194.9	175.34	0.48	0.5	8.72	10.09	11.05	10.85	1.94	1.69	1.86	1.8	2.24	2.2	2.38	2.15
(CLWN201/CML504)DH73	1.91	79.31	80.28	209.94	203.64	0.48	0.49	6.09	4.35	11.53	11.88	2.09	1.93	2.03	2.06	2.24	2.12	2.4	2.32
(CLWN201/CML504)DH74	2.46	78.93	79.33	210.56	207.4	0.47	0.49	9.69	12.14	12.01	12.94	1.78	1.44	2.19	2.29	2.24	2.55	2.37	2.02
(CLWN201/CML504)DH75	2.92	78.46	77.5	208.95	201.55	0.48	0.5	7.63	7.7	13.04	15.21	1.94	1.69	1.85	1.77	2.24	1.97	2.34	1.75
(CLWN201/CML504)DH76	1.93	78.68	78.34	199.89	186.32	0.47	0.48	5.26	2.56	12.58	14.21	2.37	2.37	2.18	2.28	2.24	2.47	2.43	2.69
(CLWN201/CML504)DH77	3.23	78.67	77.97	206.04	198.18	0.48	0.5	11.41	15.96	10.61	9.86	2.33	2.31	2.19	2.3	2.24	2.42	2.39	2.19
(CLWN201/CML504)DH78	3.55	79.57	81.38	209.08	200.72	0.48	0.5	6.63	5.58	9.58	7.57	2.26	2.19	2.39	2.62	2.24	2.2	2.42	2.57
(CLWN201/CML504)DH79	2.72	77.8	75.18	202.47	188.16	0.47	0.48	7.55	7.54	15.27	20.2	1.97	1.74	1.81	1.72	2.24	2.92	2.41	2.42
(CLWN201/CML504)DH8	2.49	79.32	80.62	219.04	217.08	0.48	0.49	5.07	2.09	11.86	12.6	2.01	1.81	2.19	2.3	2.24	2.27	2.35	1.81
(CLWN201/CML504)DH80	2.19	78.36	77.18	208.98	201.68	0.47	0.48	4.55	1.03	13.93	17.21	2.47	2.51	2.04	2.08	2.24	2.27	2.39	2.3
(CLWN201/CML504)DH81	2.44	77.38	73.85	203.41	193.75	0.47	0.47	8.52	9.63	12.93	14.97	2.39	2.39	1.68	1.51	2.24	2.2	2.39	2.26
(CLWN201/CML504)DH82	1.76	78.79	78.63	220.55	225.56	0.48	0.5	6.02	4.26	14.95	19.45	2.2	2.12	2	2.01	2.24	1.77	2.36	1.93
(CLWN201/CML504)DH83	1.93	79.17	79.7	210.12	204.16	0.48	0.5	4.55	0.99	13.12	15.4	2.1	1.94	2.04	2.07	2.24	2.4	2.38	2.18
(CLWN201/CML504)DH84	2.96	78.16	76.28	215.91	214.81	0.48	0.5	10.94	14.88	8.29	4.71	2.27	2.23	2.19	2.31	2.24	1.97	2.4	2.35
(CLWN201/CML504)DH85	2.43	78.82	78.72	207.18	197.85	0.46	0.47	6.26	4.74	10.67	9.96	1.9	1.63	2.03	2.07	2.24	2.2	2.38	2.12
(CLWN201/CML504)DH86	1.91	79.53	81.19	217.43	217.16	0.48	0.5	5.7	3.65	10.75	10.17	2.53	2.63	1.68	1.51	2.24	2.45	2.41	2.52
(CLWN201/CML504)DH87	2.08	78.29	76.94	211.07	206.14	0.47	0.48	4.44	0.8	12.39	13.78	2.05	1.87	2.02	2.06	2.24	2.07	2.4	2.31
(CLWN201/CML504)DH88	3.21	78.67	78.17	203.75	190.83	0.47	0.48	8.13	8.79	13.89	17.11	2.24	2.18	1.86	1.79	2.24	2.49	2.42	2.57
(CLWN201/CML504)DH89	3.09	78.74	78.42	206.27	196.1	0.46	0.46	5.28	2.6	14.9	19.34	2.06	1.88	2.01	2.02	2.24	2.07	2.44	2.81
(CLWN201/CML504)DH9	1.59	79.08	79.74	205.89	196.75	0.46	0.46	15.22	24.18	13.07	15.41	2.04	1.87	2.15	2.23	2.24	2.42	2.4	2.4
(CLWN201/CML504)DH90	2.06	79.02	79.44	202.39	190.8	0.48	0.51	9.23	11.36	9.83	7.87	2.18	2.06	1.69	1.54	2.24	2.6	2.4	2.37
(CLWN201/CML504)DH91	2.3	79.43	80.87	206.41	195.9	0.46	0.46	7.3	7.05	15.11	20.16	2.06	1.88	2.34	2.52	2.24	2.6	2.41	2.42
(CLWN201/CML504)DH92	3.33	78.96	79.1	213.13	211.33	0.46	0.47	6.05	4.26	13.09	15.36	2.18	2.07	1.7	1.56	2.24	2.47	2.41	2.43
(CLWN201/CML504)DH93	2.04	79.57	81.4	200.01	182.87	0.47	0.48	4.67	1.25	11.12	10.98	1.96	1.73	2.04	2.08	2.24	2.07	2.42	2.62
(CLWN201/CML504)DH94	1.35	78.86	78.89	203.96	190.77	0.47	0.47	11.13	15.33	12.13	13.23	1.98	1.75	1.71	1.58	2.24	2.27	2.44	2.83
(CLWN201/CML504)DH95	1.67	78.97	79.19	205.77	196.17	0.46	0.47	11.12	15.32	11.91	12.72	2.18	2.07	2.03	2.06	2.24	1.85	2.36	1.97
(CLWN201/CML504)DH96	2.21	79.18	79.91	216.59	215.7	0.48	0.49	5.62	3.35	11.9	12.72	2.22	2.13	2.23	2.38	2.24	2.47	2.44	2.81
(CLWN201/CML504)DH97	1.95	78.08	76.16	206.52	195.88	0.46	0.46	3.99	-0.53	11.39	11.53	2.18	2.06	2.01	2.01	2.24	2.27	2.37	2.05
(CLWN201/CML504)DH98	1.94	78.8	78.76	207.85	200.08	0.46	0.46	4.28	0.42	16.68	23.28	2.13	2	1.88	1.82	2.24	2.35	2.42	2.63
(CLWN201/CML504)DH99	2.32	78.71	78.36	216.24	214.63	0.46	0.47	5.5	3.04	13.47	16.2	1.86	1.56	2.01	2.02	2.24	2.32	2.41	2.44
(CLWN201/CML511)DH1	2	78.92	79.2	209.16	205.03	0.46	0.46	9.7	12.25	14.67	18.78	2.21	2.13	2.04	2.07	2.24	2	2.37	2.08
(CLWN201/CML511)DH10	3.26	77.89	75.79	208.84	205.17	0.46	0.45	4.5	0.96	15.35	20.27	1.89	1.63	2.17	2.26	2.24	2.13	2.36	1.89
(CLWN201/CML511)DH101	3.47	78.3	77.07	208.69	205.1	0.47	0.47	4.52	0.98	14.5	18.4	2.15	2.05	2.02	2.04	2.24	2.06	2.42	2.55
(CLWN201/CML511)DH102	3.27	78.95	79.2	209.55	205.46	0.44	0.42	5.76	3.46	14.44	18.55	2.13	2.01	1.67	1.49	2.24	1.97	2.36	1.93
(CLWN201/CML511)DH103	3.64	78.77	78.79	209.74	207.2	0.45	0.43	5.16	2.35	17.22	24.37	2.2	2.12	1.69	1.53	2.24	1.88	2.39	2.27
(CLWN201/CML511)DH104	4.88	78.59	78.18	209.23	205.48	0.45	0.42	9.39	11.55	13.64	16.49	2.33	2.32	1.87	1.81	2.24	2.5	2.43	2.63
(CLWN201/CML511)DH105	3.06	79.58	81.42	213.72	212.99	0.47	0.47	4.25	0.42	14.88	19.2	2	1.81	2.01	2.02	2.24	2.13	2.39	2.25
(CLWN201/CML511)DH106	2.18	79.08	79.68	214.04	214.68	0.46	0.45	6.76	5.81	15.58	20.77	2.17	2.07	1.83	1.73	2.24	2.25	2.36	1.97
(CLWN201/CML511)DH107	2.22	79.17	80.28	204.17	196.53	0.45	0.44	5.08	2.17	12.27	13.44	1.89	1.63	1.69	1.54	2.24	1.88	2.37	2.07
(CLWN201/CML511)DH108	3.04	78.36	77.25	202.85	195.13	0.46	0.44	14.19	21.97	14.08	17.45	2.4	2.43	1.7	1.55	2.24	1.69	2.39	2.26
(CLWN201/CML511)DH11	2.89	78.64	78.51	211.26	208.32	0.46	0.45	6.98	6.31	13.31	15.76	1.96	1.74	1.85	1.76	2.24	2.31	2.4	2.31
(CLWN201/CML511)DH110	4.48	79.57	81.46	208.97	202.97	0.46	0.45	3.63	-0.97	12.57	14.12	2	1.8	1.85	1.78	2.24	2.13	2.4	2.37
(CLWN201/CML511)DH111	2.2	79.24	80.21	221.48	226.3	0.47	0.46	4.72	1.37	15.48	20.56	1.81	1.5	1.65	1.46	2.24	2.32	2.34	1.75
(CLWN201/CML511)DH112	2.7	78.43	77.52	211.51	209.69	0.45	0.44	7.39	7.19	13.82	16.86	2.27	2.23	1.84	1.74	2.24	1.75	2.36	1.89
(CLWN201/CML511)DH113	2.96	79	79.41	215.19	216.49	0.45	0.42	6.67	5.58	13.52	16.24	2.12	2	2.01	2.02	2.24	2.19	2.39	2.25
(CLWN201/CML511)DH118	3.62	78.24	77.07	210.01	207.5	0.48	0.5	4.26	0.47	17.37	24.73	1.88	1.62	1.85	1.79	2.24	1.82	2.34	1.75
(CLWN201/CML511)DH119	3.79	78.48	77.75	204.19	196.62	0.47	0.46	6.24	4.66	12.38	13.69	2.44	2.5	1.84	1.77	2.24	1.75	2.36	1.87
(CLWN201/CML511)DH12	4.53	79.11	80.05	215.5	216.84	0.45	0.44	6.01	4.21	12.79	14.57	2.33	2.31	2	1.99	2.24	2.44	2.38	2.1
(CLWN201/CML511)DH120	4.11	79.22	80.46	210.6	208.63	0.48	0.49	5.66	3.4	12.64	14.37	2.01	1.81	1.85	1.77	2.24	1.94	2.43	2.63
(CLWN201/CML511)DH13	3.08	78.64	78.28	213.64	212.2	0.46	0.46	5.57	3.23	16.23	22.22	2.23	2.17	1.82	1.74	2.24	1.94	2.35	1.84
(CLWN201/CML511)DH14	1.73	78.5	77.89	208.47	205.03	0.47	0.47	6.87	6.06	13.31	15.77	1.97	1.75	1.71	1.55	2.24	1.81	2.36	1.9
(CLWN201/CML511)DH15	3.77	78.8	78.76	195.59	177.23	0.46	0.45	4.24	-0.06	14.98	19.78	2.24	2.18	1.98	1.96	2.24	2.48	2.37	2.02
(CLWN201/CML511)DH16	2.94	78.3	77.21	198.99	187.74	0.46	0.45	5.01	2.05	13.18	15.46	1.97	1.75	1.67	1.49	2.24	1.69	2.42	2.51
(CLWN201/CML511)DH17	4.09	78.21	76.88	207.38	201.22	0.47	0.48	4.68	1.33	12.5	13.95	2.04	1.87	1.67	1.49	2.24	1.75	2.41	2.49
(CLWN201/CML511)DH18	2.06	78.32	77.23	204.83	197.78	0.45	0.43	9.57	11.95	16.6	23.02	1.81	1.5	2.16	2.24	2.24	2.38	2.4	2.32
(CLWN201/CML511)DH19	2.11	78.54	78.05	202.33	193.44	0.45	0.43	6.41	5.09	11.57	11.91	2.02	1.82	1.66	1.48	2.24	1.69	2.34	1.72
(CLWN201/CML511)DH2	3.41	78.73	78.63	212.03	212.59	0.47	0.46	5.83	3.87	13.68	16.57	2.06	1.89	1.68	1.53	2.24	1.81	2.4	2.38
(CLWN201/CML511)DH20	4.74	76.16	69.75	191.54	174.25	0.43	0.39	7.89	8.3	23.28	37.8	2.59	2.74	1.84	1.76	2.24	2.69	2.4	2.37
(CLWN201/CML511)DH21	4.36	79.28	80.47	214.88	215.93	0.46	0.45	17.7	29.63	12.45	13.83	2.14	2.01	2.2	2.3	2.24	2.69	2.43	2.7
(CLWN201/CML511)DH23	3.07	78.28	77.13	208.91	204.61	0.45	0.44	4.11	0.03	21.1	32.97	2.04	1.86	2.36	2.54	2.24	2.25	2.37	2.07
(CLWN201/CML511)DH24	2.23	79.38	80.9	226.9	237.59	0.46	0.45	10.5	13.98	14.17	17.63	1.89	1.62	2.01	2.02	2.24	2.5	2.36	1.94
(CLWN201/CML511)DH25	3.66	78.88	78.98	207.09	199.94	0.46	0.46	6.32	4.8	14.49	18.35	2.11	1.99	2.03	2.06	2.24	2.13	2.34	1.7
(CLWN201/CML511)DH26	2.92	78.92	79.17	204	196.92	0.46	0.45	9.71	12.23	14.48	18.35	2.12	1.99	2.67	3.01	2.24	2.56	2.38	2.18
(CLWN201/CML511)DH27	1.25	78.84	78.95	224.47	233.42	0.46	0.46	5.85	3.86	15.28	20.1	2.05	1.88	1.85	1.76	2.24	2	2.36	1.91
(CLWN201/CML511)DH28	4.56	78.3	77.18	215.83	217.23	0.45	0.43	5.55	3.21	12.81	14.64	1.89	1.63	2.18	2.27	2.24	2.38	2.36	1.9
(CLWN201/CML511)DH29	2.76	79.36	80.74	219.35	222.58	0.46	0.45	14.57	22.87	14.51	18.41	2.16	2.06	2.03	2.06	2.24	2.63	2.39	2.21
(CLWN201/CML511)DH3	4.16	78.35	77.29	184.01	161.12	0.46	0.45	11.07	15.19	12.82	14.68	2.28	2.24	2.18	2.29	2.24	2.32	2.4	2.38
(CLWN201/CML511)DH30	3.96	78.1	76.44	206.18	199.86	0.46	0.44	9.55	11.88	19.85	30.23	2.4	2.43	1.83	1.74	2.24	2.13	2.41	2.46
(CLWN201/CML511)DH31	4.31	78.58	78.24	212.66	212.87	0.48	0.48	11	15.11	11.78	12.35	2.21	2.13	2	2	2.24	2.38	2.4	2.37
(CLWN201/CML511)DH32	1.87	79.08	79.78	211.78	212.06	0.46	0.45	7.87	8.2	14.05	17.39	2.04	1.87	2.19	2.29	2.24	2.38	2.35	1.82
(CLWN201/CML511)DH33	3.46	78.93	79.35	219.34	225.17	0.47	0.47	8.25	9.16	12.03	12.92	1.83	1.52	1.86	1.79	2.24	1.81	2.34	1.74
(CLWN201/CML511)DH34	2.85	78.59	78.32	206.95	201.26	0.47	0.48	4.93	1.84	14.61	18.61	2.32	2.31	2.02	2.03	2.24	2.13	2.34	1.66
(CLWN201/CML511)DH35	3.51	78.63	78.33	210.13	206.62	0.45	0.43	5.08	2.23	17.11	24.15	2.04	1.87	1.85	1.77	2.24	2.06	2.38	2.18
(CLWN201/CML511)DH36	2.1	78.92	79.24	208.05	204.88	0.47	0.46	11.23	15.54	15.98	21.64	1.96	1.75	2.04	2.09	2.24	2.44	2.42	2.56
(CLWN201/CML511)DH37	4	78.75	78.72	212.51	211.51	0.46	0.45	9.35	11.43	15.07	19.65	2.31	2.3	2.33	2.5	2.24	2.38	2.36	1.99
(CLWN201/CML511)DH38	3.06	78.81	78.65	212.14	210.42	0.46	0.45	5.85	3.87	15.16	19.85	2.11	1.98	2.17	2.26	2.24	2.38	2.35	1.81
(CLWN201/CML511)DH39	2.92	77.95	76.03	198.27	186.26	0.46	0.45	3.67	-0.79	16.29	22.34	2.04	1.87	1.84	1.76	2.24	2.25	2.39	2.24
(CLWN201/CML511)DH4	3.59	78.49	77.54	193.33	176.55	0.46	0.45	4.9	1.79	19.3	29.03	2.4	2.43	1.67	1.49	2.24	2.32	2.41	2.43
(CLWN201/CML511)DH40	3.32	79.74	82.12	210.01	207.57	0.47	0.48	5.62	3.28	13.36	15.84	2.09	1.94	1.85	1.78	2.24	2.13	2.36	1.89
(CLWN201/CML511)DH42	3.63	79.2	80.22	207.46	202.1	0.46	0.45	9.34	11.47	16.26	22.3	1.78	1.48	1.68	1.53	2.24	2.25	2.42	2.52
(CLWN201/CML511)DH43	4.79	78.82	79.05	215.85	216.64	0.46	0.45	9.7	12.19	12	12.86	2.22	2.14	1.82	1.73	2.24	2.07	2.39	2.26
(CLWN201/CML511)DH44	4.22	78.36	77.48	200.61	190.62	0.45	0.43	7.93	8.43	18.77	27.82	2.06	1.89	1.69	1.54	2.24	2.13	2.4	2.37
(CLWN201/CML511)DH45	2.69	78.19	76.78	220.36	225.15	0.46	0.46	5.13	2.33	12.99	15.03	2.4	2.44	2.02	2.04	2.24	2	2.34	1.66
(CLWN201/CML511)DH46	3.9	78.44	77.59	206.83	200.15	0.45	0.44	8.17	8.84	18.26	26.74	1.98	1.76	1.99	1.98	2.24	2.25	2.39	2.25
(CLWN201/CML511)DH47	3.07	78.6	78.24	212.29	210.9	0.46	0.44	4.55	1.04	12.56	14.09	2.41	2.44	1.83	1.74	2.24	1.63	2.34	1.76
(CLWN201/CML511)DH48	3.45	79.72	81.98	199.65	187.8	0.46	0.45	5.15	2.25	11.85	12.52	2.11	1.98	1.98	1.97	2.24	2.13	2.39	2.27
(CLWN201/CML511)DH49	2.26	78.42	77.66	195.73	182.11	0.44	0.42	4.96	1.98	18.52	27.25	1.88	1.62	2	1.99	2.24	2.56	2.38	2.12
(CLWN201/CML511)DH5	3.08	78.57	78.19	211.82	209.73	0.46	0.45	8.14	8.82	11.09	10.84	1.97	1.75	1.7	1.54	2.24	2.19	2.41	2.43
(CLWN201/CML511)DH51	4.65	78.58	77.85	210.19	207.53	0.46	0.45	6.83	5.98	14.3	17.97	2.68	2.87	2.35	2.52	2.24	2.13	2.36	1.9
(CLWN201/CML511)DH52	2.7	79.23	80.16	211.05	209.07	0.47	0.47	4.32	0.55	12.7	14.4	1.78	1.48	1.84	1.76	2.24	1.82	2.34	1.76
(CLWN201/CML511)DH53	5.32	79.37	80.7	214.84	215.54	0.48	0.49	6.7	5.74	13.44	16.05	2.44	2.5	2.02	2.05	2.24	2.25	2.41	2.43
(CLWN201/CML511)DH54	5.23	78.47	77.58	208.17	203.12	0.47	0.47	4.62	1.24	12.93	14.93	2.4	2.43	2.04	2.07	2.24	2.44	2.39	2.25
(CLWN201/CML511)DH55	2.6	78.58	78.13	208.53	202.42	0.46	0.45	8.93	10.6	15.59	20.78	1.95	1.74	2.04	2.09	2.24	2.25	2.36	1.92
(CLWN201/CML511)DH56	4.18	78.99	79.53	203.18	196.9	0.46	0.45	5.22	2.47	11.32	11.35	2.42	2.48	1.99	1.98	2.24	2	2.41	2.4
(CLWN201/CML511)DH57	2.88	78.88	79	203.03	194.34	0.46	0.46	3.62	-0.96	11.81	12.42	2.18	2.1	1.84	1.76	2.24	1.94	2.34	1.76
(CLWN201/CML511)DH58	3.83	79.25	80.12	205.24	196.65	0.47	0.47	8.88	10.44	13.77	16.8	2.22	2.16	1.85	1.78	2.24	2.13	2.39	2.24
(CLWN201/CML511)DH59	4.37	79.74	82.03	199.54	187.6	0.47	0.48	5.47	3.02	15.19	19.88	2.28	2.24	2.18	2.27	2.24	2.19	2.37	2.06
(CLWN201/CML511)DH6	4.43	78.95	79.44	213.63	213.53	0.47	0.47	4.39	0.7	13.72	16.67	1.99	1.79	2.19	2.3	2.24	2.38	2.34	1.77
(CLWN201/CML511)DH60	2.56	79	79.57	200.28	189.28	0.47	0.47	9.39	11.63	12.08	13.01	2.32	2.3	2.18	2.28	2.24	1.88	2.36	1.93
(CLWN201/CML511)DH61	3.96	78.25	76.86	204.94	198.53	0.46	0.45	4.88	1.71	14.63	18.67	2.43	2.49	2.02	2.03	2.24	2.38	2.37	2.06
(CLWN201/CML511)DH62	1.86	78.67	78.55	208.36	204.33	0.45	0.44	4.53	1.01	18.35	26.88	1.9	1.64	2.01	2.01	2.24	2.31	2.36	1.98
(CLWN201/CML511)DH63	3.77	78.67	78.45	204.9	198.06	0.46	0.45	4.81	1.59	12.08	13.03	2.43	2.48	1.69	1.54	2.24	1.75	2.38	2.14
(CLWN201/CML511)DH64	4.23	78.89	79.3	208.53	202.61	0.47	0.46	4.91	1.81	14.07	17.43	2.05	1.88	1.7	1.55	2.24	2.07	2.43	2.63
(CLWN201/CML511)DH65	1.8	79.06	79.81	220.65	226.97	0.47	0.47	14.88	23.52	13.41	15.96	2.43	2.49	1.83	1.74	2.24	2.25	2.39	2.22
(CLWN201/CML511)DH66	2.29	78.33	77.24	206.51	198.99	0.45	0.44	9.17	11.02	15.58	20.8	1.88	1.62	1.69	1.54	2.24	1.88	2.37	2.05
(CLWN201/CML511)DH67	2.86	78.9	79.2	208.21	203.41	0.46	0.45	5.19	2.44	14.71	18.83	2.03	1.87	1.69	1.53	2.24	2	2.34	1.76
(CLWN201/CML511)DH69	2.66	78.45	77.62	200.41	189.57	0.44	0.42	9.13	11.04	15.21	19.98	1.79	1.48	2.19	2.31	2.24	2.19	2.39	2.23
(CLWN201/CML511)DH7	5.18	79.16	80.02	212.18	210.54	0.45	0.44	5.74	3.66	13.42	15.99	2.05	1.88	1.71	1.57	2.24	2.13	2.46	2.99
(CLWN201/CML511)DH70	2.25	79.4	80.75	223.24	231.79	0.47	0.48	6.41	5.1	12.18	13.26	1.96	1.74	1.71	1.56	2.24	2.13	2.34	1.76
(CLWN201/CML511)DH71	2.63	79.38	80.89	207.79	203.49	0.47	0.47	5.66	3.39	14.11	17.51	1.9	1.64	2.04	2.06	2.24	1.94	2.38	2.11
(CLWN201/CML511)DH72	2.24	78.73	78.75	214.81	216.12	0.46	0.45	9.3	11.36	12.59	14.18	1.97	1.76	1.85	1.77	2.24	2.25	2.37	2.04
(CLWN201/CML511)DH73	2.44	78.53	77.83	211.62	210.01	0.45	0.44	4.95	1.89	14.56	18.54	2.28	2.25	2.18	2.28	2.24	2.13	2.34	1.71
(CLWN201/CML511)DH74	2.73	78.86	79	208.6	205.71	0.46	0.45	7.43	7.33	10.61	9.76	2.13	2	1.67	1.5	2.24	2.13	2.41	2.44
(CLWN201/CML511)DH75	2.73	78.2	76.6	197.51	186.16	0.45	0.42	10.04	13.01	13.23	15.58	2.27	2.24	2.19	2.29	2.24	2.19	2.42	2.61
(CLWN201/CML511)DH76	3.89	78.94	79.15	207.01	202.81	0.47	0.47	5.68	3.46	17.99	26.12	2.13	2.03	2.17	2.24	2.24	2.63	2.38	2.17
(CLWN201/CML511)DH77	2.73	79.18	80.15	209.11	206.79	0.47	0.48	5.01	2	15.65	20.92	2.07	1.93	1.66	1.48	2.24	1.88	2.37	2.02
(CLWN201/CML511)DH78	2.54	78.52	78.07	214.81	215.97	0.45	0.43	14.05	21.68	12.88	14.79	2.23	2.17	1.7	1.53	2.24	1.94	2.39	2.25
(CLWN201/CML511)DH79	3.01	78.56	77.98	207.85	203.04	0.43	0.4	6.37	5	15.45	20.49	2.12	2	1.67	1.49	2.24	2.07	2.43	2.68
(CLWN201/CML511)DH8	5.9	78.47	77.77	219.5	224.07	0.46	0.46	4.02	-0.1	13.75	16.71	2.49	2.56	2.18	2.28	2.24	2.38	2.4	2.38
(CLWN201/CML511)DH80	3.06	79	79.4	210.96	209.53	0.46	0.45	5.47	3.04	15.01	19.55	2.16	2.05	1.84	1.77	2.24	1.88	2.35	1.82
(CLWN201/CML511)DH81	4.26	79	79.44	198.44	186.68	0.46	0.45	11.76	16.7	17.2	24.35	2.34	2.33	1.9	1.86	2.24	2.32	2.4	2.32
(CLWN201/CML511)DH82	4	78.77	78.76	206.35	201.91	0.46	0.46	14.39	22.44	13.37	15.86	1.96	1.74	2.18	2.27	2.24	2.44	2.45	2.86
(CLWN201/CML511)DH83	3.15	78.8	79.08	215.3	216.22	0.47	0.47	5.8	3.68	12.18	13.24	1.88	1.62	1.86	1.79	2.24	1.69	2.35	1.87
(CLWN201/CML511)DH84	1.82	78.25	77.12	206.01	200.12	0.44	0.42	9.78	12.39	14.97	19.44	2.03	1.85	1.65	1.46	2.24	2.13	2.4	2.32
(CLWN201/CML511)DH85	4.62	78.08	76.47	203.94	197.15	0.46	0.45	14.12	21.91	15.95	21.58	2.25	2.19	2.17	2.26	2.24	2.25	2.39	2.24
(CLWN201/CML511)DH86	4.42	78.48	77.58	203.59	195.57	0.45	0.43	10.69	14.34	17.57	25.19	2.46	2.54	1.85	1.77	2.24	2.25	2.41	2.46
(CLWN201/CML511)DH88	3.39	78.55	77.94	202.55	193.9	0.46	0.45	4.68	1.39	13.12	15.32	2.19	2.11	2.02	2.04	2.24	1.88	2.38	2.18
(CLWN201/CML511)DH89	2	78.89	79.2	195.96	181.04	0.46	0.45	4.42	0.74	12.65	14.28	2.13	2	2	2.01	2.24	2.94	2.43	2.69
(CLWN201/CML511)DH9	2.88	79.39	80.89	211.07	209.16	0.47	0.47	8.92	10.57	15.07	19.64	2.06	1.89	1.87	1.8	2.24	1.94	2.36	1.88
(CLWN201/CML511)DH90	3.8	78.49	77.71	220.06	224.58	0.46	0.44	3.6	-1	15.89	21.49	2.24	2.19	1.68	1.52	2.24	2.06	2.37	2.06
(CLWN201/CML511)DH91	2.34	78.98	79.5	208.4	204.2	0.46	0.46	6.4	5.11	11.55	11.87	2.04	1.87	2.01	2.02	2.24	2.13	2.38	2.09
(CLWN201/CML511)DH92	5.16	79.06	79.68	218.96	223.19	0.47	0.47	5.05	2.19	14.34	18.05	2.17	2.06	2.35	2.53	2.24	2.69	2.41	2.49
(CLWN201/CML511)DH93	4.28	78.45	77.6	203.3	195.16	0.46	0.45	13.58	20.62	18.89	28.09	2.39	2.43	1.87	1.81	2.24	2.06	2.4	2.37
(CLWN201/CML511)DH94	2.59	79.41	80.92	213.35	214.3	0.47	0.48	18.74	31.94	10.48	9.49	2.08	1.93	1.68	1.52	2.24	2	2.39	2.27
(CLWN201/CML511)DH95	1.19	79.09	79.62	214.44	215.31	0.46	0.46	5.79	3.68	15.16	19.83	1.96	1.74	1.8	1.71	2.24	1.94	2.37	2.06
(CLWN201/CML511)DH96	2.92	79.24	80.24	209.98	205.62	0.47	0.46	5.18	2.4	12.08	13.05	1.79	1.48	2.17	2.26	2.24	2.31	2.41	2.43
(CLWN201/CML511)DH98	3.42	78.42	77.74	213.46	213.73	0.46	0.45	8.62	9.9	17.95	26	1.82	1.51	2	1.99	2.24	2.5	2.38	2.12
(CML494/CML550)DH1	4	78.91	79.81	227.67	249.03	0.46	0.45	6.55	5.48	7.53	-0.26	2.41	2.48	2.41	2.58	2.24	1.92	2.38	2
(CML494/CML550)DH11	5.6	78.82	79.5	233.02	257.53	0.48	0.48	6.42	5.19	7.59	-0.13	2.37	2.38	2.9	3.24	2.24	1.75	2.41	2.5
(CML494/CML550)DH110	5.4	78.93	79.7	219.46	233.56	0.45	0.43	7.21	7.1	7.65	0.04	2.98	3.49	1.43	1.26	2.24	2.08	2.43	2.79
(CML494/CML550)DH113	5.52	78.6	79.1	218.02	229.73	0.46	0.43	7.36	7.36	7.65	0.03	2.93	3.38	2.4	2.55	2.24	2.17	2.41	2.51
(CML494/CML550)DH114	4.54	78.79	79.31	227.15	245.77	0.45	0.42	7.54	7.77	8.17	1.59	2.62	2.86	1.54	1.4	2.24	1.75	2.37	1.88
(CML494/CML550)DH116	4.53	78.9	79.69	229.47	253.06	0.46	0.45	8.55	10.08	7.95	0.96	2.64	2.88	2.05	2.09	2.24	2.17	2.41	2.5
(CML494/CML550)DH118	6	79.37	81.02	228.15	248.59	0.45	0.44	7.39	7.41	7.65	0.02	2.77	3.12	1.43	1.24	2.24	2.92	2.43	2.76
(CML494/CML550)DH119	5.86	79.35	80.83	220.03	232.01	0.47	0.46	8.58	10.13	8.19	1.66	3.05	3.61	1.41	1.24	2.24	2.67	2.43	2.87
(CML494/CML550)DH12	4.78	79.18	80.68	234.65	259.91	0.46	0.44	7.55	7.75	8.25	1.82	2.86	3.27	1.53	1.37	2.24	1.92	2.39	2.26
(CML494/CML550)DH120	5.63	79.84	82.27	225.62	244.22	0.47	0.47	7.27	7.19	7.62	-0.02	3.13	3.76	2.07	2.13	2.24	2.17	2.42	2.65
(CML494/CML550)DH121	4.65	80	82.56	228.91	249.74	0.46	0.44	8.04	8.88	7.59	-0.16	2.56	2.74	1.67	1.57	2.24	2.17	2.41	2.41
(CML494/CML550)DH122	5.15	79.91	82.47	228.22	247.41	0.47	0.48	7.34	7.35	7.71	0.19	2.72	3.01	1.49	1.32	2.24	2.25	2.44	3.04
(CML494/CML550)DH124	4.74	79.14	80.36	226.64	245.98	0.48	0.49	7.33	7.3	7.7	0.13	2.49	2.61	1.9	1.88	2.24	1.33	2.4	2.41
(CML494/CML550)DH125	4.9	79.45	81.17	225.34	244.11	0.46	0.44	7.9	8.62	7.52	-0.37	2.99	3.49	1.7	1.62	2.24	2.08	2.44	2.96
(CML494/CML550)DH126	4.38	79.16	80.36	225.7	244.21	0.47	0.47	7.02	6.56	7.59	-0.12	2.76	3.1	2.16	2.23	2.24	1.83	2.42	2.63
(CML494/CML550)DH127	4.66	79.28	80.9	228.67	249.98	0.46	0.45	7.89	8.6	7.66	0.07	2.93	3.38	2.47	2.63	2.24	1.92	2.4	2.39
(CML494/CML550)DH129	5	78.88	79.59	219.47	232.81	0.46	0.44	7.17	6.88	7.62	-0.07	2.64	2.88	1.42	1.23	2.24	1.92	2.4	2.35
(CML494/CML550)DH130	5.38	78.6	79.01	222.48	238.59	0.45	0.42	7.57	7.83	8.12	1.46	2.79	3.14	2.53	2.74	2.24	2.17	2.44	2.96
(CML494/CML550)DH131	5.05	79.14	80.28	218.35	231.59	0.47	0.48	6.91	6.39	7.64	0.03	2.77	3.11	1.4	1.2	2.24	2.33	2.44	2.9
(CML494/CML550)DH132	5.76	78.86	79.8	228.78	250.5	0.46	0.45	6.54	5.47	8.15	1.51	2.58	2.76	2.06	2.11	2.24	1.92	2.39	2.24
(CML494/CML550)DH136	4.88	79.6	81.54	231.52	253.34	0.47	0.48	7.43	7.48	7.69	0.14	2.8	3.14	1.77	1.7	2.24	2	2.44	3
(CML494/CML550)DH142	5.14	78.6	79	214.82	225.2	0.46	0.45	6.66	5.72	8.11	1.38	2.86	3.27	1.99	1.99	2.24	1.92	2.42	2.64
(CML494/CML550)DH144	4.9	79.5	81.4	228.3	248.22	0.46	0.45	8.29	9.52	8.77	3.37	3.01	3.52	2.39	2.54	2.24	1.92	2.43	2.9
(CML494/CML550)DH148	4.64	78.21	77.87	214.8	224.45	0.44	0.41	7.31	7.23	7.65	0.04	2.41	2.48	2.65	2.9	2.24	1.92	2.4	2.25
(CML494/CML550)DH149	5.24	78.7	79.08	220.11	232.13	0.46	0.44	7.62	8.02	7.56	-0.2	2.97	3.47	2.17	2.26	2.24	1.67	2.38	1.98
(CML494/CML550)DH15	5.01	78.7	79.16	228.05	250.26	0.45	0.43	10.35	14.13	7.58	-0.15	2.75	3.09	1.65	1.56	2.24	2.08	2.43	2.88
(CML494/CML550)DH153	5.38	79.8	82.04	230.46	254.3	0.46	0.45	6.98	6.48	7.57	-0.23	2.51	2.64	1.55	1.43	2.24	2.17	2.43	2.78
(CML494/CML550)DH154	5.64	78.87	79.72	223.7	241.83	0.46	0.44	7.15	6.92	7.62	-0.06	3.2	3.87	1.89	1.85	2.24	2.42	2.41	2.52
(CML494/CML550)DH158	4.68	78.95	79.91	221.56	238.58	0.47	0.46	7.4	7.43	8.66	3.05	2.66	2.9	2.62	2.85	2.24	2.42	2.41	2.51
(CML494/CML550)DH163	5.5	78.82	79.54	225.36	242.72	0.45	0.43	6.69	5.81	8.17	1.56	2.82	3.22	1.64	1.53	2.24	2.42	2.44	2.9
(CML494/CML550)DH169	5.13	79.54	81.47	230.52	254.81	0.49	0.5	7.23	7.1	7.66	0.07	2.57	2.76	2.42	2.6	2.24	1.67	2.44	3.05
(CML494/CML550)DH170	5.48	78.82	79.45	234.6	260.01	0.46	0.45	6.8	6.1	8.02	1.13	3.12	3.74	1.66	1.55	2.24	1.92	2.4	2.39
(CML494/CML550)DH171	5.38	78.42	78.5	234.29	259.37	0.44	0.4	11.71	17.26	8.21	1.67	3.12	3.75	2.65	2.91	2.24	2.25	2.4	2.4
(CML494/CML550)DH174	5.38	79.01	80.03	219.51	233.51	0.44	0.39	7.92	8.62	8.03	1.19	2.79	3.14	2.29	2.43	2.24	2.08	2.42	2.62
(CML494/CML550)DH175	5.02	79.84	82.25	233.19	257.31	0.47	0.46	6.81	6.05	7.67	0.08	2.44	2.51	1.91	1.9	2.24	2.17	2.4	2.36
(CML494/CML550)DH179	5.37	80.04	82.77	225.76	243	0.44	0.41	8.76	10.52	8.28	1.87	2.7	2.99	2.39	2.54	2.24	2.25	2.41	2.49
(CML494/CML550)DH19	4.74	78.83	79.61	229.64	249.45	0.44	0.41	9.52	12.29	7.58	-0.16	2.83	3.23	2.28	2.4	2.24	2.08	2.42	2.61
(CML494/CML550)DH190	4.53	78.95	79.95	225.07	243.36	0.45	0.42	9.85	12.97	7.58	-0.16	2.69	2.98	2.02	2.05	2.24	2.08	2.43	2.74
(CML494/CML550)DH192	4.65	78.62	79.09	220.01	233.93	0.46	0.45	9.08	11.3	8.23	1.76	2.85	3.25	1.66	1.56	2.24	1.67	2.4	2.4
(CML494/CML550)DH193	5.18	79.03	80.14	212.92	221.08	0.47	0.48	8.89	10.86	8.39	2.24	2.79	3.13	2.18	2.27	2.24	2.33	2.41	2.5
(CML494/CML550)DH194	5.14	78.94	79.94	219.63	231.68	0.46	0.45	7.08	6.74	8.7	3.17	2.74	3.03	2.51	2.71	2.24	2.42	2.42	2.64
(CML494/CML550)DH197	5.04	78.93	79.65	231.9	256.66	0.45	0.43	10.28	14.58	7.66	0.05	2.92	3.37	1.68	1.58	2.24	2.33	2.44	3.03
(CML494/CML550)DH198	5.37	79.22	80.59	231.49	253.06	0.46	0.45	6.62	5.71	7.68	0.1	3.12	3.74	1.52	1.36	2.24	2.08	2.41	2.46
(CML494/CML550)DH199	5.62	79.83	82.28	230.58	254.69	0.44	0.4	7.79	8.33	7.67	0.06	3.06	3.63	1.81	1.77	2.24	2.67	2.44	2.98
(CML494/CML550)DH20	5.02	79.98	82.79	224.65	243.72	0.46	0.44	7.8	8.36	7.65	0.05	2.98	3.49	1.77	1.68	2.24	2.25	2.44	2.99
(CML494/CML550)DH200	4.89	79.07	80.15	235.06	262.55	0.47	0.46	7.79	8.4	7.6	-0.08	2.57	2.75	2.3	2.42	2.24	2	2.4	2.37
(CML494/CML550)DH201	5.04	78.8	79.61	235.22	262.33	0.45	0.43	6.7	5.84	7.67	0.07	2.5	2.62	2.29	2.41	2.24	1.75	2.39	2.16
(CML494/CML550)DH206	5.01	79.01	80.11	225.64	245.2	0.45	0.43	7.11	6.77	8.07	1.29	2.69	2.98	1.76	1.67	2.24	1.92	2.43	2.84
(CML494/CML550)DH207	5.01	79.32	80.85	235.3	261.78	0.47	0.47	6.45	5.3	7.64	0	2.77	3.12	1.95	1.97	2.24	2	2.41	2.51
(CML494/CML550)DH208	5.78	79.33	80.77	219.96	233.27	0.47	0.46	8.31	9.54	8.11	1.44	2.98	3.48	1.53	1.39	2.24	2.33	2.43	2.77
(CML494/CML550)DH209	5.36	79.02	80.01	228.9	248.51	0.47	0.47	7.45	7.54	7.61	-0.08	2.79	3.14	2.32	2.46	2.24	2.17	2.43	2.77
(CML494/CML550)DH21	5.38	77.92	77.35	215.8	224.7	0.43	0.39	7.37	7.37	7.77	0.4	3.07	3.64	2.17	2.27	2.24	2	2.43	2.87
(CML494/CML550)DH211	4.75	78.64	79.06	230.55	252.91	0.47	0.46	9.52	12.33	8.21	1.66	2.85	3.25	2.19	2.28	2.24	2.08	2.39	2.24
(CML494/CML550)DH212	6.15	79.03	79.98	229.16	248.54	0.47	0.47	7.48	7.67	8.48	2.52	2.71	3	1.85	1.83	2.24	2.42	2.41	2.52
(CML494/CML550)DH215	5.01	79.55	81.45	226.64	246.98	0.47	0.47	12.62	19.31	8.11	1.37	2.78	3.12	2.15	2.23	2.24	2.08	2.42	2.7
(CML494/CML550)DH216	5.13	79.22	80.56	236.42	261.26	0.45	0.42	6.31	4.96	8.64	2.96	2.62	2.85	2.25	2.34	2.24	1.92	2.37	1.86
(CML494/CML550)DH219	5.11	79.2	80.47	230.69	255.21	0.46	0.44	6.79	6.1	7.66	0.03	2.73	3.02	2.42	2.6	2.24	2	2.42	2.61
(CML494/CML550)DH220	5.5	79.49	81.44	228.84	251.09	0.45	0.43	7.98	8.72	7.65	0.04	2.96	3.47	1.8	1.74	2.24	2.42	2.45	3.15
(CML494/CML550)DH221	5.91	78.68	79.15	228.31	250.77	0.46	0.44	7.42	7.43	7.55	-0.25	3.16	3.83	1.51	1.34	2.24	1.92	2.41	2.52
(CML494/CML550)DH223	5.52	79.6	81.59	227.63	248.29	0.47	0.46	6.33	5.06	7.62	-0.06	2.93	3.38	1.88	1.85	2.24	2.17	2.39	2.24
(CML494/CML550)DH224	5.01	79.51	81.34	228.48	250.21	0.46	0.45	7.63	7.99	7.65	0.01	2.65	2.88	1.43	1.24	2.24	1.75	2.43	2.85
(CML494/CML550)DH225	4.86	79.27	80.77	223.07	238.14	0.45	0.43	7.53	7.72	8.82	3.53	2.72	3.01	1.88	1.86	2.24	2.08	2.39	2.19
(CML494/CML550)DH226	5.11	79.12	80.23	223.78	240.34	0.47	0.46	8.4	9.78	7.68	0.12	2.94	3.39	2.56	2.79	2.24	2.67	2.44	2.91
(CML494/CML550)DH228	4.88	79.51	81.41	227.07	247.17	0.45	0.43	7.37	7.39	7.71	0.21	2.82	3.22	2.01	2.03	2.24	2.58	2.4	2.39
(CML494/CML550)DH232	4.49	78.71	79.23	230.95	254.82	0.45	0.42	7.01	6.58	8.21	1.68	2.62	2.86	1.54	1.39	2.24	1.67	2.41	2.54
(CML494/CML550)DH235	4.92	79.52	81.5	226.74	247.02	0.48	0.48	10.36	14.21	8.16	1.54	2.84	3.24	2.24	2.35	2.24	2.17	2.43	2.76
(CML494/CML550)DH24	4.97	78.7	79.15	224.5	242.13	0.45	0.43	8.92	10.92	7.61	-0.11	2.36	2.37	1.56	1.43	2.24	2.33	2.43	2.85
(CML494/CML550)DH27	5.36	77.76	76.72	217.45	229.41	0.44	0.4	6.65	5.71	8.92	3.84	2.9	3.35	1.91	1.89	2.24	2.33	2.42	2.61
(CML494/CML550)DH28	5.61	79.1	80.31	225.37	244.75	0.47	0.46	8.15	9.12	8.08	1.31	2.87	3.27	2.09	2.17	2.24	1.92	2.44	3.02
(CML494/CML550)DH29	5.39	78.29	78.17	221.85	236.86	0.46	0.45	6.85	6.22	8.7	3.15	2.49	2.61	1.66	1.58	2.24	2.25	2.43	2.74
(CML494/CML550)DH30	5.23	78.34	78.37	222.47	239.33	0.45	0.42	12.23	18.43	7.66	0.09	2.72	3.01	1.72	1.65	2.24	2.17	2.4	2.29
(CML494/CML550)DH33	5.74	79.73	81.9	227.19	245.91	0.48	0.48	7.4	7.42	8.69	3.14	2.96	3.47	1.8	1.76	2.24	2	2.44	2.9
(CML494/CML550)DH34	5.14	78.77	79.29	225.25	244.2	0.46	0.44	7.77	8.25	7.61	-0.11	2.57	2.75	2.57	2.8	2.24	2.25	2.39	2.13
(CML494/CML550)DH36	5.85	78.67	79.04	233.54	259.13	0.45	0.43	8.23	9.35	7.54	-0.26	3.14	3.76	1.65	1.56	2.24	2.42	2.44	3
(CML494/CML550)DH37	5.38	78.33	78.2	223.13	238.43	0.47	0.47	9.87	13.04	8.26	1.8	2.65	2.89	2.16	2.24	2.24	2	2.4	2.37
(CML494/CML550)DH38	5.86	79.13	80.32	223.9	241.14	0.46	0.45	6.81	6.15	8.19	1.63	2.57	2.75	2.29	2.41	2.24	2.42	2.43	2.86
(CML494/CML550)DH39	4.97	78.4	78.29	216.88	227.21	0.47	0.47	6.98	6.53	7.69	0.14	2.84	3.24	1.83	1.78	2.24	2.08	2.39	2.23
(CML494/CML550)DH4	5.74	78.92	79.68	223.81	240.87	0.48	0.48	12.92	20	7.64	0.05	3.24	3.97	2.42	2.61	2.24	2.33	2.42	2.62
(CML494/CML550)DH40	5.15	79.23	80.53	228.04	248.68	0.47	0.46	9.43	12	8.1	1.41	2.7	2.99	1.54	1.4	2.24	2.25	2.43	2.86
(CML494/CML550)DH41	5.49	79.45	81.12	225.76	245.21	0.47	0.46	7.08	6.73	7.64	-0.03	2.69	2.98	1.32	1.1	2.24	2.17	2.43	2.75
(CML494/CML550)DH42	4.75	78.12	77.59	228.99	250.75	0.45	0.42	7.9	8.58	8.19	1.61	2.72	3.01	2.79	3.09	2.24	2.08	2.39	2.24
(CML494/CML550)DH43	5.79	78.38	78.41	229.75	252.72	0.44	0.4	7.69	8.16	8.22	1.72	3.12	3.74	2.52	2.7	2.24	2.25	2.44	2.99
(CML494/CML550)DH44	5.78	79.02	80.04	229.18	251.56	0.45	0.42	8.1	9.05	7.71	0.19	2.78	3.13	1.91	1.91	2.24	2.58	2.46	3.26
(CML494/CML550)DH45	5.4	79.41	81.13	221.43	236.94	0.46	0.44	7.07	6.72	7.57	-0.21	2.93	3.39	2.39	2.54	2.24	1.92	2.42	2.63
(CML494/CML550)DH46	4.73	79.15	80.28	231.22	253.17	0.46	0.45	8.64	10.26	7.56	-0.2	2.58	2.76	2.17	2.25	2.24	2	2.43	2.89
(CML494/CML550)DH47	4.17	79.27	80.87	230.39	252.98	0.46	0.44	6.66	5.84	7.6	-0.13	2.28	2.24	2.38	2.52	2.24	1.67	2.38	2
(CML494/CML550)DH48	5.27	79.36	80.86	231.41	255.99	0.47	0.46	7.02	6.59	7.5	-0.41	3.06	3.63	1.81	1.75	2.24	2.25	2.4	2.27
(CML494/CML550)DH50	6.12	78.72	79.19	221.3	236.26	0.45	0.42	9.62	12.42	8.12	1.4	3.13	3.76	1.44	1.28	2.24	2.67	2.44	3.01
(CML494/CML550)DH52	5.48	79.05	80.23	227.49	248.52	0.44	0.39	6.07	4.46	7.67	0.11	2.7	2.99	1.26	1.02	2.24	2.16	2.43	2.75
(CML494/CML550)DH54	4.4	78.51	78.67	221.65	237.63	0.46	0.45	6.89	6.35	8.27	1.81	2.43	2.5	2.52	2.71	2.24	2	2.4	2.38
(CML494/CML550)DH55	4.02	78.63	78.92	229.8	253.11	0.49	0.5	6.91	6.34	7.68	0.12	2.55	2.73	1.66	1.56	2.24	1.67	2.4	2.39
(CML494/CML550)DH56	5.26	79.15	80.35	225.17	243.87	0.46	0.44	6.49	5.34	7.67	0.1	2.57	2.75	2.45	2.63	2.24	1.92	2.38	2.02
(CML494/CML550)DH58	5.37	78.38	78.35	229.19	250.02	0.46	0.44	7.11	6.87	7.55	-0.25	2.91	3.37	2.05	2.08	2.24	1.83	2.4	2.38
(CML494/CML550)DH6	5.62	78.86	79.47	224.31	241.86	0.47	0.46	9.27	11.7	8.21	1.7	2.76	3.11	2.14	2.21	2.24	2.25	2.44	3
(CML494/CML550)DH61	5.89	78.05	77.55	229.05	251.56	0.45	0.42	6.82	6.09	7.6	-0.11	3.18	3.85	1.3	1.07	2.24	1.67	2.42	2.62
(CML494/CML550)DH68	5.02	79.63	81.72	227.27	246.02	0.46	0.45	6.74	5.93	7.7	0.15	2.43	2.49	1.95	1.96	2.24	2.33	2.44	2.98
(CML494/CML550)DH7	6.17	78.14	77.67	221.7	239.11	0.46	0.44	6.41	5.21	8.24	1.83	2.88	3.33	1.78	1.72	2.24	2.42	2.43	2.79
(CML494/CML550)DH70	5.41	78.7	79.11	209.74	213.39	0.46	0.44	7.9	8.62	8.64	2.99	2.89	3.35	1.82	1.79	2.24	2.25	2.46	3.25
(CML494/CML550)DH73	5.37	78.95	79.84	226.97	247.03	0.46	0.45	9.39	11.94	7.66	0.04	3.04	3.61	2.39	2.55	2.24	2.33	2.46	3.26
(CML494/CML550)DH75	6.1	78.79	79.65	226.65	246.45	0.46	0.45	7.17	6.94	7.58	-0.18	2.76	3.1	1.91	1.9	2.24	2	2.41	2.58
(CML494/CML550)DH76	4.75	78.57	78.89	226.3	245.35	0.47	0.46	7.52	7.67	7.73	-2.02	2.75	3.09	2.28	2.4	2.24	2.08	2.4	2.38
(CML494/CML550)DH80	5.1	79.05	80.16	222.54	239.94	0.45	0.43	11.72	17.3	8.37	2.16	2.49	2.62	2.19	2.28	2.24	2.5	2.41	2.53
(CML494/CML550)DH81	4.75	78.62	78.98	221.99	238.55	0.45	0.43	7.5	7.58	7.53	-0.3	2.69	2.98	1.42	1.25	2.24	2	2.39	2.14
(CML494/CML550)DH82	5.13	78.57	78.94	228.17	248.67	0.45	0.43	7.8	8.38	8.4	2.26	2.31	2.27	1.56	1.43	2.24	2.09	2.42	2.61
(CML494/CML550)DH86	4.99	78.97	79.86	226.7	246.33	0.46	0.45	8.9	10.89	8.06	1.29	2.16	2.01	2.65	2.89	2.24	2.09	2.42	2.67
(CML494/CML550)DH89	4.67	79.25	80.7	225.92	246.09	0.45	0.43	10.85	15.26	12.31	13.89	2.76	3.1	2.91	3.25	2.24	2.25	2.43	2.75
(CML494/CML550)DH9	5.26	78	77.36	220.51	235.29	0.46	0.44	7.23	6.99	7.62	-0.05	3.15	3.77	2.02	2.04	2.24	2.08	2.39	2.23
(CML494/CML550)DH99	4.48	78.8	79.4	218.7	231.42	0.47	0.46	7.13	6.88	8.16	1.59	2.41	2.48	2.78	3.09	2.24	2.08	2.4	2.33

## Sheet: F3pop
Genotype	F3pop4_BLUE_NCLB	F3pop5_BLUE_NCLB	F3pop6_BLUE_NCLB
F3pop_1	3.57805	2.01034	2.85032
F3pop_2	4.35578	1.98365	3.80397
F3pop_3	4.1201	2.3235	3.8383
F3pop_4	3.81372	2.47926	2.01929
F3pop_5	3.79059	1.62233	3.06944
F3pop_6	3.54015	1.92261	2.999
F3pop_7	3.98578	2.10215	2.37351
F3pop_8	3.74035	2.28898	3.15168
F3pop_9	3.77098	2.58313	4.74392
F3pop_10	3.86941	1.6222	2.61172
F3pop_11	3.49758	2.59982	2.64297
F3pop_12	4.01382	1.93032	3.29929
F3pop_13	3.86069	1.69024	2.67728
F3pop_14	4.50293	2.03442	2.50026
F3pop_15	4.49336	2.46589	4.37546
F3pop_16	4.19379	2.33616	2.64562
F3pop_17	3.65618	2.65378	3.57436
F3pop_18	4.12473	1.99088	2.54748
F3pop_19	4.52897	1.85554	2.04273
F3pop_20	4.38891	2.59973	2.61876
F3pop_21	3.80899	1.5912	2.90358
F3pop_22	3.75494	1.79459	2.72422
F3pop_23	2.9872	2.1438	3.01469
F3pop_24	3.49721	2.5826	2.79835
F3pop_25	4.00547	1.89919	4.08558
F3pop_26	4.23994	1.94481	3.1432
F3pop_27	3.49395	2.28896	4.00992
F3pop_28	4.94874	2.00717	2.4305
F3pop_29	3.90059	2.48378	3.48491
F3pop_30	3.96359	2.16923	3.80513
F3pop_31	3.4679	2.15112	3.1292
F3pop_32	3.59609	2.31332	3.09193
F3pop_33	4.67814	1.85403	3.46786
F3pop_34	3.74035	2.04252	2.89206
F3pop_35	4.06162	2.84929	3.99016
F3pop_36	3.72213	2.1637	2.82946
F3pop_37	3.55325	2.48484	2.29251
F3pop_38	3.4992	1.53089	3.11457
F3pop_39	3.58582	1.75088	3.63546
F3pop_40	4.04649	2.71387	2.40081
F3pop_41	3.80766	2.4249	3.07
F3pop_42	3.89768	1.60952	3.34892
F3pop_43	3.79342	2.22242	3.77571
F3pop_44	4.15745	2.42033	2.75353
F3pop_45	3.76459	2.13794	2.42578
F3pop_46	3.82	2.95274	3.22544
F3pop_47	3.85896	2.36815	2.7847
F3pop_48	4.55031	1.94991	2.79277
F3pop_49	4.2545	1.94502	3.07972
F3pop_50	4.66631	1.99393	2.71803
F3pop_51	4.26536	2.23553	2.81891
F3pop_52	3.42965	1.64513	2.97061
F3pop_53	3.83796	1.70379	2.48125
F3pop_54	4.02576	2.2876	2.81174
F3pop_55	4.58873	1.9177	3.84003
F3pop_56	3.9049	2.73697	3.83355
F3pop_57	3.59743	2.40016	2.98343
F3pop_58	3.46215	2.32308	3.07055
F3pop_59	3.73224	2.15866	2.44553
F3pop_60	3.4416	2.99908	3.84025
F3pop_61	3.04688	2.25474	4.45283
F3pop_62	4.42417	1.81	2.40908
F3pop_63	3.84915	2.71462	3.14567
F3pop_64	3.7806	2.5034	3.17146
F3pop_65	4.01254	2.44073	2.54266
F3pop_66	4.27004	2.14017	2.97053
F3pop_67	5.21551	2.12606	2.77195
F3pop_68	3.94228	2.16664	3.20635
F3pop_69	3.56081	2.51865	3.44312
F3pop_70	3.74148	2.0793	2.85907
F3pop_71	4.14871	2.30905	3.79475
F3pop_72	4.2687	2.12005	2.48748
F3pop_73	3.6616	1.69661	3.02132
F3pop_74	4.18189	2.53538	2.34195
F3pop_75	3.87288	1.94068	3.12239
F3pop_76	4.34284	2.3251	2.59609
F3pop_77	3.47483	2.0683	3.46953
F3pop_78	3.56092	1.99247	3.20194
F3pop_79	3.57906	1.896	3.42338
F3pop_80	4.40187	2.23077	3.0099
F3pop_81	2.85132	1.88782	2.76457
F3pop_82	3.44799	2.13292	3.12729
F3pop_83	4.74406	2.3833	3.8463
F3pop_84	4.19047	2.36631	2.56909
F3pop_85	3.38152	2.06665	2.73012
F3pop_86	4.11901	2.05319	4.02006
F3pop_87	3.37771	2.30475	2.93948
F3pop_88	4.08123	2.30919	3.83962
F3pop_89	4.12808	2.13162	2.83311
F3pop_90	3.54743	1.80913	2.77711
F3pop_91	4.0493	2.01648	2.90685
F3pop_92	3.40269	1.54726	2.89459
F3pop_93	3.98821	2.19851	5.33607
F3pop_94	4.30764	1.94793	2.71831
F3pop_95	3.57931	2.47233	2.57149
F3pop_96	4.79837	2.17422	2.60749
F3pop_97	3.59685	2.2303	3.17876
F3pop_98	3.77887	2.16346	3.53621
F3pop_99	3.72774	2.60101	2.64515
F3pop_100	3.94484	2.03518	2.74262
F3pop_101	3.96266	2.74359	4.18535
F3pop_102	4.12101	1.95775	2.59121
F3pop_103	3.18353	2.24216	2.67147
F3pop_104	4.43412	2.67679	3.34219
F3pop_105	2.97914	1.79236	2.57605
F3pop_106	5.40254	2.5136	2.47734
F3pop_107	4.22751	2.04622	3.06739
F3pop_108	3.53889	1.67121	3.28692
F3pop_109	4.6539	2.05376	3.29888
F3pop_110	5.34841	2.3298	2.84412
F3pop_111	3.69277	2.10821	2.59801
F3pop_112	3.70808	2.17425	4.26395
F3pop_113	3.83302	1.95102	3.44192
F3pop_114	3.35793	2.37911	2.98155
F3pop_115	3.40426	1.76555	2.73732
F3pop_116	4.18671	2.33234	3.29453
F3pop_117	3.65966	1.89371	3.33977
F3pop_118	4.12708	1.66706	2.51735
F3pop_119	3.74564	1.84002	3.33148
F3pop_120	5.18386	2.44868	2.83883
F3pop_121	3.66877	1.96649	3.48412
F3pop_122	4.46141	2.70779	2.5226
F3pop_123	4.6318	1.83711	2.66265
F3pop_124	4.30243	2.19176	4.03464
F3pop_125	4.05726	2.15466	2.61516
F3pop_126	3.5348	2.48514	2.44577
F3pop_127	4.27467	2.44699	3.56158
F3pop_128	3.69863	3.12209	2.44036
F3pop_129	3.63124	2.42686	2.77582
F3pop_130	2.80197	2.59199	3.34788
F3pop_131	4.61144	2.15349	5.43611
F3pop_132	3.63032	2.31138	2.96682
F3pop_133	4.05364	2.23215	2.70748
F3pop_134	4.0515	2.0018	2.39846
F3pop_135	3.98327	2.2704	2.91673
F3pop_136	3.67087	1.72679	2.91209
F3pop_137	3.49116	1.64205	1.96764
F3pop_138	3.99357	1.99889	3.72357
F3pop_139	3.51521	2.0518	2.45256
F3pop_140	4.48984	2.00098	3.37488
F3pop_141	3.50324	2.48423	3.06401
F3pop_142	3.77721	1.67389	2.64613
F3pop_143	4.85097	2.03264	2.58588
F3pop_144	3.81535	2.89766	3.4414
F3pop_145	3.32907	2.12589	2.4693
F3pop_146	3.64916	1.79418	3.73818
F3pop_147	4.02984	2.26922	2.99065
F3pop_148	4.66724	2.31354	2.8892
F3pop_149	4.22721	2.5556	3.1688
F3pop_150	3.97103	1.92279	2.54455
F3pop_151	3.58844	2.72395	2.62743
F3pop_152	3.9522	1.5607	3.37712
F3pop_153	3.26886	2.41328	2.98565
F3pop_154	4.18838	1.7252	2.88531
F3pop_155	3.85841	2.0015	2.95845
F3pop_156	4.0076	1.92932	2.55382
F3pop_157	4.35917	2.63232	2.92728
F3pop_158	4.24289	1.70008	3.89304
F3pop_159	3.81398	2.41477	3.49074
F3pop_160	3.22419	2.70867	3.273
F3pop_161	3.93643	2.38529	2.64168
F3pop_162	3.5459	2.05112	3.04236
F3pop_163	4.28692	2.38861	3.7175
F3pop_164	4.05164	1.79199	3.00685
F3pop_165	3.5541	2.15787	4.77274
F3pop_166	4.05369	2.46758	3.02456
F3pop_167	4.26919	2.14806	3.03404
F3pop_168	4.8181	2.21869	2.7466
F3pop_169	3.11267	2.39138	2.42877
F3pop_170	3.76045	2.05787	2.91663
F3pop_171	3.83806	1.6041	2.89049
F3pop_172	3.54497	2.1228	2.84163
F3pop_173	NA	2.23765	2.83813
F3pop_174	NA	1.48089	4.68159
F3pop_175	NA	2.3151	2.47547
F3pop_176	NA	1.78059	4.05075
F3pop_177	NA	2.15291	2.83569
F3pop_178	NA	2.01847	3.52747
F3pop_179	NA	2.29577	3.16903
F3pop_180	NA	2.27983	3.84156
F3pop_181	NA	1.44603	2.43402
F3pop_182	NA	1.82042	2.59959
F3pop_183	NA	2.26361	2.40437
F3pop_184	NA	2.31001	2.8897
F3pop_185	NA	2.19551	2.635
F3pop_186	NA	2.41625	2.62011
F3pop_187	NA	2.73843	2.56543
F3pop_188	NA	2.35001	3.87775
F3pop_189	NA	2.20831	2.69102
F3pop_190	NA	2.1059	3.33744
F3pop_191	NA	1.83064	2.7693
F3pop_192	NA	2.93846	2.92156
F3pop_193	NA	2.10486	2.73309
F3pop_194	NA	1.86438	2.49456
F3pop_195	NA	1.91916	2.89486
